# Supplementary material
Source: PubMed Central journal article supplement (PMC4250114)
Supplement: pnas.1419550111.sapp.pdf [file pnas.1419550111.sapp.pdf]

## SUPPORTING INFORMATION

### **Targeted Carbon Conservation at National Scales with High-Resolution Monitoring**

Gregory P. Asner<sup>1</sup>, David E. Knapp<sup>1</sup>, Roberta E. Martin<sup>1</sup>, Raul Tupayachi<sup>1</sup>,  
Christopher B. Anderson<sup>1</sup>, Joseph Mascaro<sup>1</sup>, Felipe Sinca<sup>1</sup>,  
K. Dana Chadwick<sup>1</sup>, Mark Higgins<sup>1</sup>, William Farfan<sup>2</sup>,  
William Llactayo<sup>3</sup>, Miles R. Silman<sup>2</sup>

<sup>1</sup>Department of Global Ecology, Carnegie Institution for Science, Stanford, CA USA  
([gpa@carnegiescience.edu](mailto:gpa@carnegiescience.edu), [dknapp@carnegiescience.edu](mailto:dknapp@carnegiescience.edu),  
[rmartin@carnegiescience.edu](mailto:rmartin@carnegiescience.edu), [r2t.dge@gmail.com](mailto:r2t.dge@gmail.com), [cbanders@carnegiescience.edu](mailto:cbanders@carnegiescience.edu),  
[jmascaro@stanford.edu](mailto:jmascaro@stanford.edu))

<sup>2</sup>Department of Biology, Wake Forest University, Winston-Salem, NC USA  
([wfarfan@gmail.com](mailto:wfarfan@gmail.com), [silmanmr@wfu.edu](mailto:silmanmr@wfu.edu))

<sup>3</sup>Dirección General de Ordenamiento Territorial, Ministerio del Ambiente, San Isidro,  
Lima, Perú  
([wllactayo@minam.gob.pe](mailto:wllactayo@minam.gob.pe))

\* Author for correspondence: [gpa@carnegiescience.edu](mailto:gpa@carnegiescience.edu); Tel: 650.3251521; Fax  
650.462.5968

This file includes:

Methods  
References  
Figs. S1-S13  
Table S1

## Methods

Our mapping approach is summarized in **Fig. S1**. The core technology is airborne Light Detection and Ranging (LiDAR), which yields highly detailed measurements of forest canopy height and vertical canopy profile that predictably scale with variation in aboveground carbon stocks. Recent studies of a wide range of vegetation types worldwide demonstrate that airborne LiDAR can be used to estimate ACD at one-hectare resolution with a precision and accuracy matching estimates based on field measurements alone (1). When properly calibrated, airborne LiDAR-based and field plot-based estimates of forest carbon stocks approach just 10% absolute disagreement at one-hectare spatial resolution, across a wide range of vegetation types including tropical forests (2, 3). This offset of around 10% is lower than the typical errors incurred in field plot-based estimates of tropical forest carbon stocks at one-hectare resolution (4). This suggests that airborne LiDAR can be used to extend field-plot networks to far larger spatial scales. Critically, airborne LiDAR-estimated stocks of aboveground carbon can be generated over hundreds of thousands of hectares per day - a task that cannot be accomplished with field plots.

A second key component of the approach to derive high-resolution carbon maps relies on machine learning algorithms to scale airborne LiDAR samples up to full regional or country-wide coverage maps. For decades, stratification and sampling of forests based on *a priori* environmental information, such as elevation or forest type, has served as the method to extrapolate carbon stock estimates from field inventory plots (5). However, stratification-based methods can yield artificial boundaries in the resulting carbon maps, particularly when applied across highly diverse environmental

conditions (6). In response to this problem, Baccini et al. (7) employed a Random Forest Machine Learning (RFML) algorithm to model the relationship between LiDAR-based forest carbon samples and a portfolio of spatially extensive satellite data sets. RFML fits multiple environmental datasets (predictors) to estimates of vegetation structure or biomass (response), as described later. In doing so, a direct scaling of LiDAR samples to full-coverage maps can be derived without artificial boundaries between ecosystems that often occur using traditional stratification approaches. Recently, Mascaro et al. (8) showed that scaling LiDAR-based carbon samples up to a regional level was 60% more accurate with RFML compared to traditional stratification approaches. In addition, Baccini and Asner (9) demonstrated that RFML methods can be quickly and cost-effectively updated with new carbon data over time, allowing for dynamic long-term monitoring. Another attractive characteristic of RFML is its ability to provide quantitative information on the environmental variables most predictive of current carbon distributions (8, 10).

### ***LiDAR Flight Planning***

We used airborne LiDAR to massively sample plant canopy structure throughout Perú. The final map of aboveground carbon density (ACD) relied on an airborne LiDAR sampling approach that supplies data to the RFML upscaling methodology (described below). This required a focus of many aircraft flights on forested ecosystems, but it also included extensive portions of grassland, shrubland, savanna, and open woodland ecosystems. We approached this challenge by over-sampling the land surface using a preliminary national stratification of the country as a flight-planning guide. The

stratification was based on geologic substrate, soils, topography and large known shifts in community composition, and was described in detail in (11).

### ***LiDAR Data Acquisition***

The LiDAR data were collected using the Carnegie Airborne Observatory-2 Airborne Taxonomic Mapping System (AToMS; 12), which is carried onboard a twin turbopropeller Dornier 228 aircraft. The AToMS LiDAR is a dual laser, scanning waveform system capable of firing at 500,000 laser shots per second. To cover the maximum area per flight hour, the aircraft was operated at speeds of up to 150 knots at an altitude averaging 2000 m above ground level. The LiDAR settings were configured to achieve an average on-the-ground laser spot spacing of 4 shots m<sup>-2</sup>, peaking at 8 shots m<sup>-2</sup> in areas of flightline overlap.

Airborne LiDAR sampling was carried out using 100 x 100 km grid cells overlaid on the stratification map. For this study, we sought to sample at least 2% (200 km<sup>2</sup>) of each grid cell, with the additional goal of sampling at least 2% of the weighted contribution each stratification class to each grid cell. Past work has shown that 1% coverage per vegetation type yields robust and stable statistical distributions for landscapes of about 500 ha or larger (6). A total of 6,761,624 ha of LiDAR data were collected throughout the country in an extensive sampling pattern shown in **Fig. S2a**. The LiDAR sampling density achieved by stratification class averaged 6.47% or 655.8 km<sup>2</sup> per grid cell (**Fig. S2b**). Some grid cells to the far edges of the mapping area were sampled less, with the lowest coverage amounting to 179.2 km<sup>2</sup> (1.8%) of a grid cell along the border with Colombia.

### ***LiDAR-based Canopy Height***

Mean top-of-canopy height (TCH) was calculated for each hectare of LiDAR coverage ( $n = 6,761,624$ ). To create this data layer, laser range measurements from the LiDAR were combined with embedded high resolution Global Positioning System-Inertial Measurement Unit (GPS-IMU) data to determine the 3-D locations of laser returns, producing a 'cloud' of LiDAR data. The resulting LiDAR data cloud consisted of a very large number of precisely georeferenced point elevation measurements ( $n \sim 278$  trillion), where elevation is relative to a reference ellipsoid (WGS 1984).

These LiDAR data points were processed to identify which laser pulses penetrated the canopy volume and reached the ground surface, from which a high-resolution digital terrain model (DTM) was developed. This was achieved using a 10 m x 10 m filter kernel throughout the LiDAR coverage, and the lowest elevation in each kernel was deemed a possible ground detection. These filtered points were then evaluated by fitting a horizontal plane through each point. If the closest unclassified point was  $< 5.5^\circ$  and  $< 1.5$  m higher in elevation, the pre-filtered point was finalized as a ground-classified surface point. This process was repeated until all potential ground points within the LiDAR coverage were evaluated. A digital surface model (DSM), which is essentially the top-most surface (e.g., canopies, buildings, exposed ground), was also generated based on interpolations of all first-return points at 1.0 m spatial resolution. By combining the DTM and DSM in a tightly matched pair of data layers, the vertical difference between them yielded a high-accuracy model of top-of-canopy height (TCH) at 1.1 m spatial resolution throughout the 6,761,624 ha LiDAR sampling coverage.

Previous validation studies of this CAO LiDAR TCH estimation approach has demonstrated it to be highly accurate in a wide range of forests including extremely densely foliated, tall tropical forests exceeding 60 m in height and leaf area index (LAI) levels (13, 14). The 1.1-m TCH data were then averaged to one-hectare resolution, which further decreases uncertainty in derived mean top-of-canopy canopy height (15).

### ***Upscaling LiDAR to a Full Map Coverage***

Scaling up a large volume of LiDAR TCH data to full map coverage can be accomplished with a variety of techniques, one of which is applying LiDAR-derived statistics of canopy height to an environmental stratification map. Often stratification maps are based on *a priori* knowledge of vegetation type and/or abiotic factors such as soils, elevation, and climate. This “paint by numbers” stratified sampling approach is often used with plot-based forest inventory data to assign field-based estimates to different stratification classes (16-18). Stratification has also been used with airborne LiDAR in nearly the same type of approach (6).

The problem with stratification is that it is overly dependent upon *a priori* knowledge of the factors that may or may not drive variation in the ecological metric of interest -- aboveground carbon density in this case. In an environmentally complicated region like Perú, with ecosystems ranging from cold highland deserts to humid submontane assemblages to vast lowland forests on varying geologies, we likely cannot stratify well enough to develop confidence in bridging the scale gap from LiDAR or field plots to full geographic coverages. Moreover, because extremely large geographies contain exceedingly remote habitats and highly variable cloud densities, neither LiDAR

datasets nor field inventory plots can be placed throughout them in a random or systematically-aligned design (19). This renders typical spatial methods for scaling, such as averaging or kriging (20), prone to very large errors. As a result, maps based on stratification or simple spatial extrapolation are unreliable, and they cannot be used to properly generate spatially-explicit maps of uncertainty, which is paramount to understanding the stocks, gains and losses of carbon from a large, heterogeneous region such as the Peruvian Andes or the Amazon basin.

To meet this challenge, machine learning algorithms have been developed and applied to spatially-discontinuous datasets, like field plots and LiDAR sampling, in order to develop spatially-explicit estimates of vegetation properties based on spatially-contiguous environmental variables such as topography, geologic substrate and long-term climate maps. In this context, the Random Forest Machine Learning (RFML) algorithm (21), has been used in global tropical forest carbon mapping (7), as well as in national, sub-national, and down-scaled global carbon mapping (9, 10). RFML fits multiple decision trees to input data (e.g. spatially-coincident environmental datasets) using a random subset of the input variables for each tree constructed for a given response variable (e.g., LiDAR TCH samples). The modal value of the calculated decision trees is used to create an “ensemble” tree that is used for prediction (e.g. spatially-contiguous TCH). RFML is non-parametric, insensitive to data skew, and robust to a high number of variable inputs (22). Recently, a comprehensive comparison of RFML to the traditional stratification-based approach for upscaling LiDAR samples has demonstrated the RFML approach in a 16 million ha portion of lowland Amazonia (8). However, that study also suggested that spatial context plays a major role in

determining how well RFML can scale from local samples to full coverage, particularly with respect to strong gradients in environmental factors. In the case of the Andes-to-Amazon, or Perú as a whole, the region contains enormous variation in most abiotic factors including elevation, slope, aspect, geologic substrate and soils, floristics, and climate. Thus, RFML cannot perform well unless it has a mechanism to accommodate numerous and rapid spatial changes in environmental conditions.

To address this issue, we developed a new version of RFML based on a moving tile technique that ingests the airborne LiDAR data in local models (**Fig. S3**). These tiles are then mosaicked together to form large, contiguous, national-scale mapping products. Specifically, we created hundreds of RFML models by dividing the LiDAR and environmental data into a system of geographic tiles, each covering 200 x 200 km per tile. In addition, we ran the models on these tiles with an overlap of 50 km on each side, for a total coverage of 300 x 300 km per tile. In each tile, up to 60,000 1-ha LiDAR measurements of average TCH were randomly selected from all possible LiDAR 1-ha TCH values in the tile. The remaining unselected LiDAR data were used later for validation of the RFML modeling approach, described later.

The environmental variables used in each of the tiled RFML models were taken from co-aligned predictor spatial datasets (**Fig. S4**). These include the fractional cover of photosynthetic vegetation (PV), non-photosynthetic vegetation (NPV), and bare substrate (Bare) derived from a national-scale mapping of Perú using the CLASlite approach with a mosaic of Landsat satellite imagery (23). Each fractional cover map quantitatively indicates the percentage cover in every 30-m Landsat pixel, and as a result, the maps of PV, NPV and Bare substrate are highly sensitive to spatial variation



in canopy gap fraction, openness and roughness, as described in previous studies (24, 25). The fractional cover maps were computed from a mosaic of cloud-free imagery using the compositing method presented in Asner et al. (10), with an additional cross-image brightness normalization (26). Previous studies have demonstrated that fractional PV and NPV are highly correlated with woody and non-woody cover, respectively, in nearly all ecosystems (27-32).

An additional set of environmental variables was derived from NASA Shuttle Radar Topography Mission (SRTM) at 90 m resolution: elevation, slope and aspect (**Fig. S4**). A relative elevation model (REM) was also developed by calculating the height of the ground above nearest water body (33), thus providing a spatial proxy for vegetation-related water resources. We included multiple potential incoming solar insolation models using SRTM elevation data in the SAGA GIS Potential Insolation module (34). These insolation layers (units of kWhm<sup>-2</sup>) were created by modeling total insolation (direct and diffuse) for the days of the equinoxes and solstices (21<sup>st</sup> of Mar, Jun, Sept, and Dec). Additionally, we included long-term (2000-2010) cloudiness data derived from the NASA Moderate Resolution Imaging Spectroradiometer (MODIS). Cloudiness is based on the number of times a MODIS pixel was identified as being affected by clouds in the Quality Assurance (QA) flags of the 8-day reflectance product (35). The QA flags used in the compilation included the following: Pixel Adjacent to Cloud, Internal Cloud Algorithm, Cirrus Detected, Cloud Shadow and MOD35 Cloud. The number of flags that were set to “on” for each pixel were added and averaged to yield a percent cloudiness per pixel. All environmental predictor maps were resampled to one-

hectare resolution, co-aligned, and combined into a stack of predictor variables covering the entire country of Perú.

The predictor maps and the LiDAR one-hectare TCH samples were run through the tile-based RFML models to create regression trees (**Fig. S1, S3**). Because the process was carried out on individual 300 x 300 km tiles, some discontinuities along the edges of each tile were observed. A mosaicking methodology was therefore developed to adjust the data in the overlap area of each tile in the mosaic. To accomplish this goal, a central tile was used as the start of the national-scale mosaic, and adjacent overlapping tiles were added one by one along the edges of the central tile. Each new tile added to the mosaic was adjusted as a weighted average of each pixel based on its proximity to the edge of the tile. For example, a one-hectare pixel on the very edge of a 300 x 300 km tile would be weighted more with the value of the overlapping pixel of its neighbor tile. Similarly, a pixel close to the center of its tile, but still in the overlap area, would be weighted more with the tile center to which it is closest.

To further increase the robustness of this tile-based RFML approach, we ran ten iterations for each tile, with each iteration randomly selecting a different set of up to 60,000 one-hectare LiDAR TCH observations. Additionally, in each tile RFML run, we successively shifted the extent of the tile by 10% (20 km) in the East-West and North-South directions. Each of these ten iterations formed a separate mosaic of the mapped (upscaled) TCH throughout Perú. The ten individual, national-scale mosaics were then averaged to produce a single national-scale map of TCH at one-hectare resolution, with a corresponding standard deviation map generated from the ten individual RFML modeling runs. The standard deviation map is an indicator of how uncertain predicted

TCH is in each hectare of Perú based on using different sets of direct LiDAR TCH observations throughout the tiling system.

We left out 10.5% (536,874 ha) of the LiDAR data from the RFML models, randomly distributed throughout the entire LiDAR coverage. We used these data to validate the upscaled TCH map, which indicated a  $R^2 = 0.78$  and a root mean squared error (RMSE) of 3.50 m (**Fig. S5a**). In addition, we analyzed our relative error in mapped TCH as a percentage RMSE against LiDAR-measured canopy height (**Fig. S5b**). This indicated large relative errors of more than 60% on short (low biomass) vegetation of less than 5 m height, and decreasing relative error of less than 20% on higher biomass vegetation of 15 m or taller. For the purposes of ecological analysis or carbon accounting, these errors are quite low, and are heightened only in smaller canopies that often represent very low-biomass shrublands or rapidly regrowing successional vegetation associated with agricultural systems that are not large aboveground carbon stores. In contrast, our errors are demonstrably low for tall forest ecosystems where the overwhelming majority of aboveground carbon is stored.

### ***Calibrating Mapped TCH to ACD***

Aboveground carbon density (ACD) was estimated from the mapped TCH data following the approach of plot-aggregate allometric scaling (1, 2). They determined that a highly precise and accurate link between TCH and field estimates of ACD can be made by applying regional plot-aggregated estimates of vegetation wood density and diameter-to-height relationships. To develop this TCH-to-ACD calibration for Andean and Amazonian forests, and other vegetation types throughout the region, a permanent

inventory plot network was established in three latitudinal belts covering northern, central and southern Perú. The network includes 272 plots comprised of 262 0.3-ha plots, and an additional ten 1.0-ha plots as shown in **Fig. S6**. The plot network is arranged in a nested design of 5-30 individual plots in 13 regionally distributed clusters to capture landscape-scale heterogeneity in carbon stocks across geological, soil, topographic and floristic compositional conditions. The plots include major forest types in lowland Amazonia including white sand, clay terrace, alluvial floodplain, swamp, *Mauritia* palm and bamboo-dominated ecosystems. Additionally, the plot network incorporates an extensive sampling of submontane and montane dry to wet forests, woodlands and shrublands up to treeline at multiple altitudes and latitudes. Finally, the plot network includes coverage of both primary and secondary forests, selectively logged forests, Brazil-nut concession forests, and highly degraded to deforested lands.

We estimated ACD in each field plot using allometric models. We first accounted for dead trees and non-tree growth forms, such as palms, bamboo, and lianas, by using growth-form-specific allometric models (6). For palms and dead trees we used models incorporating height measured using laser range finders. For all other individuals, we used a new, generalized allometric model from Chave et al. (36), which in addition to diameter, requires inputs of wood density and height. We identified 98.7% of living stems to genus, and obtained a genera-specific wood density estimate from a global wood density database for 96.4% of living stems. We accounted for height variation using a combination of direct measurements (with either laser range finders or clinometers) and diameter-based estimation. We measured the height of the three

largest-diameter trees in each plot (e.g., those with the greatest importance to carbon estimation) as well as seven or more additional trees in each plot spanning a range of diameters. These tree height data were used in two ways: (a) measured trees retained their measured heights for input into the Chave et al. (36) allometric model, and (b) more than 10,400 tree measurements were used for the creation of a diameter-to-height model that was used to estimate the height of all other trees. We multiplied all dry biomass estimates by 0.48 to calculate ACD.

We used maximum likelihood analysis to fit a power-law model between field-estimated ACD and TCH. The fit was performed on the un-transformed TCH and ACD values using a non-arithmetic error term to account for heteroskedasticity; this method is analogous to fitting a linear model to the log-transformed TCH and ACD data, but avoids the need for back-transformation (37). In addition, a recently identified change in wood density with elevation was incorporated into the TCH-to-ACD calibration using plots along an Andean-Amazon elevation gradient (38), thereby establishing the regression slope of a linear relationship between wood density and elevation. This slope was found to be  $0.00005 \text{ mg cm}^{-3} \text{ m}^{-1}$  of elevation gain above 400 m elevation. The adjustment was applied to plots of elevations above 400 m:

$$WD_{\text{adj}} = WD_{\text{orig}} + ((\text{ELEV}_{\text{site}} - 400) * 0.00005) \quad (\text{i})$$

Incorporating this adjustment for the elevation-dependence of wood density, the average increase in ACD at 1-ha resolution was  $5.0 \text{ Mg ha}^{-1}$  or 5.24%. The resulting relationship between TCH and ACD is shown in **Fig. S7**, with an RMSE =  $27.4 \text{ Mg C ha}^{-1}$  and an  $R^2 = 0.82$ . We view this accuracy and precision as excellent given the extreme breadth of vegetation structural, floristic and land-use variation incorporated in our

permanent plot network. The final calibration equation relating top-of-canopy height (TCH) to aboveground carbon density (ACD) for Andean and Amazonian forests is:

$$\text{ACD} = 0.8245 \times \text{TCH}^{1.573} \quad (2)$$

This equation was applied to the Perú-wide TCH map generated from the Random Forest modeling.

### ***Validation of Mapped Carbon Densities***

To validate the accuracy of our final carbon map, we held back field-based ACD estimates from 43 Carnegie plots spread throughout the permanent plot network coverage (**Fig. S8**). In addition, we used the eight published RAINFOR plots in lowland Amazonia (39) and six published sub-montane and montane plots (40). These field plot-based estimates of ACD were regressed against one-hectare mapped estimates from the fully upscaled (RFML modeled) results in Fig. 1 of the main text.

## References

1. Asner GP, *et al.* (2012) A universal airborne LiDAR approach for tropical forest carbon mapping. *Oecologia* 168(4):1147-1160.
2. Asner GP & Mascaro J (2014) Mapping tropical forest carbon: Calibrating plot estimates to a simple LiDAR metric. *Remote Sensing of Environment* 140(0):614-624.
3. Zolkos SG, Goetz SJ, & Dubayah R (2013) A meta-analysis of terrestrial aboveground biomass estimation using lidar remote sensing. *Remote Sensing of Environment* 128:289-298.
4. Rejou-Mechain M, *et al.* (2014) Local spatial structure of forest biomass and its consequences for remote sensing of carbon stocks. *Biogeosciences Discuss.* 11(4):5711-5742.
5. Danae M & Mollicone D (2010) Options for sampling and stratification for national forest inventories to implement REDD+ under the UNFCCC. *Carbon Balance and Management* 5:1-9.
6. Asner GP, *et al.* (2010) High-resolution forest carbon stocks and emissions in the Amazon. *Proceedings of the National Academy of Sciences* 107:16738-16742.
7. Baccini A, *et al.* (2012) Estimated carbon dioxide emissions from tropical deforestation improved by carbon-density maps. *Nature Clim. Change* doi:10.1038/nclimate1354.
8. Mascaro J, *et al.* (2014) A tale of two "forests": Random Forest machine learning aids tropical forest carbon mapping. *PLoS ONE* 9(1):e85993.
9. Baccini A & Asner GP (2013) Improving pantropical forest carbon maps with airborne LiDAR sampling. *Carbon Management* 4(6):591-600.
10. Asner G, *et al.* (2013) High-fidelity national carbon mapping for resource management and REDD+. *Carbon Balance and Management* 8(1):7.
11. Asner GP, *et al.* (2014) *The High-Resolution Carbon Geography of Peru* (Minuteman Press, Berkeley, CA USA) p 69.
12. Asner GP, *et al.* (2012) Carnegie Airborne Observatory-2: Increasing science data dimensionality via high-fidelity multi-sensor fusion. *Remote Sensing of Environment* 124(0):454-465.
13. Asner GP, Hughes RF, Varga TA, Knapp DE, & Kennedy-Bowdoin T (2009) Environmental and biotic controls over aboveground biomass throughout a tropical rain forest. *Ecosystems* 12:261-278.
14. Taylor PG, *et al.* (in press) Landscape-scale controls on aboveground forest carbon stocks on the Osa Peninsula, Costa Rica.
15. Mascaro J, Detto M, Asner GP, & Muller-Landau HC (2011) Evaluating uncertainty in mapping forest carbon with airborne LiDAR. *Remote Sensing of Environment* 115(12):3770-3774.
16. Brown S, Gillespie AJR, & Lugo AE (1989) Biomass estimation methods for tropical forests with application to forest inventory. *Forest Science* 35:881-902.
17. Lowell K (1996) Discrete polygons or a continuous surface: which is the appropriate way to model forests cartographically? *Spatial Accuracy Assessment in Natural Resources and Environmental Sciences: 2nd International Symposium*, eds Mowrer HT, Czaplewski RL, & Hamre RH (U.S. Department of Agriculture,

- Forest Service, Rocky Mountain Forest and Range Experiment Station, Fort Collins, Colorado), pp 235-242.
18. USDA Forest Service (2008) Forest Inventory and Analysis Program. (USDA, Arlington, VA).
  19. McRoberts RE, Næsset E, & Gobakken T (2013) Inference for lidar-assisted estimation of forest growing stock volume. *Remote Sensing of Environment* 128:268-275.
  20. Mitchard ETA, *et al.* (2014) Markedly divergent estimates of Amazon forest carbon density from ground plots and satellites. *Global Ecology and Biogeography*:n/a-n/a.
  21. Breiman L (2001) Random forests. *Machine Learning* 45:5-32.
  22. Evans JS, Murphy MA, Holden ZA, & Cushman SA (2011) Modeling species distribution and change using random forest. *Predictive species and habitat modeling in landscape ecology: concepts and applications*, eds Drew CA, Wiersma YF, & Huettmann F (Springer Science, New York, NY), pp 139-159.
  23. Asner GP, Knapp DE, Balaji A, & Paez-Acosta G (2009) Automated mapping of tropical deforestation and forest degradation: CLASlite. *Journal of Applied Remote Sensing* 3:033543.
  24. Bryan JE, *et al.* (2013) Extreme differences in forest degradation in Borneo: comparing practices in Sarawak, Sabah, and Brunei. *PLoS ONE* 8(7):e69679.
  25. Carlson KM, *et al.* (2012) Committed carbon emissions, deforestation, and community land conversion from oil palm plantation expansion in West Kalimantan, Indonesia. *Proceedings of the National Academy of Sciences* 109(19):7559-7564.
  26. Higgins MA, *et al.* (2012) Use of Landsat and SRTM Data to Detect Broad-Scale Biodiversity Patterns in Northwestern Amazonia. *Remote Sensing* 4(8):2401-2418.
  27. Asner GP, Elmore AJ, Flint Hughes R, Warner AS, & Vitousek PM (2005) Ecosystem structure along bioclimatic gradients in Hawai'i from imaging spectroscopy. *Remote Sensing of Environment* 96(3-4):497-508.
  28. Asner GP & Heidebrecht KB (2002) Spectral unmixing of vegetation, soil and dry carbon cover in arid regions: comparing multispectral and hyperspectral observations. *International Journal of Remote Sensing* 23(19):3939-3958.
  29. Lobell DB, Asner GP, Law BE, & Treuhaft RN (2001) Subpixel canopy cover estimation of coniferous forests in Oregon using SWIR imaging spectrometry. *Journal of Geophysical Research-Atmospheres* 106(D6):5151-5160.
  30. Roberts DA, *et al.* (2004) Spectral and structural measures of northwest forest vegetation at leaf to landscape scales. *Ecosystems* 7(5):545-562.
  31. Souza C, Firestone L, Silva LM, & Roberts D (2003) Mapping forest degradation in the Eastern Amazon from SPOT 4 through spectral mixture models. *Remote Sensing of Environment* 87(4):494-506.
  32. Asner GP, Knapp DE, Cooper AN, Bustamante MMC, & Olander LP (2005) Ecosystem structure throughout the Brazilian Amazon from Landsat observations and automated spectral unmixing. *Earth Interactions* 9:1-31.
  33. Asner G, *et al.* (2012) Human and environmental controls over aboveground carbon storage in Madagascar. *Carbon Balance and Management* 7(1):2.



34. Cimmery V (2010) User Guide for SAGA (version 2.0.5) (SourceForge).
35. LPDAAC (2011) MOD09A1. ed Center NLPDAA (USGS Earth Resources Observation and Science (EROS), Sioux Falls, SD USA).
36. Chave J, *et al.* (2014) Improved allometric models to estimate the aboveground biomass of tropical trees. *Global Change Biology*:n/a-n/a.
37. Mascaro J, Litton CM, Hughes FR, Uowolo A, & Schnitzer SA (2011) Minimizing bias in biomass allometry: model selection and log-transformation of data. *Biotropica* 43(6):649-653.
38. Malhi Y, *et al.* (2010) Introduction: Elevation gradients in the tropics: laboratories for ecosystem ecology and global change research. *Global Change Biology* 16(12):3171-3175.
39. Peacock J, Baker TR, Lewis SL, Lopez-Gonzalez G, & Phillips OL (2007) The RAINFOR database: monitoring forest biomass and dynamics. *Journal of Vegetation Science* 18(4):535-542.
40. Girardin CAJ, *et al.* (2013) Comparison of biomass and structure in various elevation gradients in the Andes. *Plant Ecology and Diversity* 6(3):100-110.

## Figure Legends

**Fig. S1.** Overview of the methodology used to map vegetation carbon stocks throughout the country of Perú: (A) A pre-stratification step combines geological, soil, community floristic composition, elevation, and forest cover maps to forecast the potential range of environmental conditions to be encountered during airborne surveys. (B) The country is gridded into 200 x 200 km sampling cells, and airborne Light Detection and Ranging (LiDAR) is used to massively sample each grid cell. Over-sampling is achieved by ensuring that large areas are covered for each potential set of environmental conditions estimated during pre-stratification. (C) A diverse array of satellite data is produced to provide continuous geographic information on vegetation cover, topographic variables, and climate. (D) The satellite and LiDAR data are processed through a geostatistical modeling approach, and combined with calibrations of LiDAR to field-estimated carbon stocks, to map aboveground carbon stocks at one-hectare resolution, along with spatially explicit uncertainty maps.

**Fig. S2.** (A) Airborne Light Detection and Ranging (LiDAR) from the Carnegie Airborne Observatory is used to sample the region shown in red lines. Total LiDAR observation coverage for this study was 6.7 million hectares. (B) Percentage coverage of each 200 x 200 km sampling grid cell. Previous studies indicate that over-sampling occurs at 1% LiDAR coverage, thus we consider this a “massive” sampling of the region.

**Fig. S3.** New geostatistical modeling approach based on the Random Forest Machine Learning (RFML) algorithm. The country of Perú is gridded into 300 x 300 km cells. In each cell, a diverse set of compiled satellite predictor maps (Fig. S4) are precisely co-aligned with airborne LiDAR samples. Up to 60,000 hectares of LiDAR data are randomly selected within a grid, and the RFML method is used to develop a prediction of LiDAR-based top-of-canopy height (TCH). This procedure is repeated ten times for each grid cell, with random selection of the input LiDAR data. An independent subset of LiDAR data are held back from the analysis of each grid cell to provide validation of the modeling results. This provides an estimate of the uncertainty in each grid cell.

**Fig. S4.** Geospatial datasets used in the Random Forest Machine Learning (RFML) algorithm to develop relationships between airborne LiDAR samples of top-of-canopy height (TCH; first image panel) and satellite-derived, continuous fields of fractional canopy cover (PV, NPV, Bare), topographic variables (elevation, slope, aspect, relative elevation above water body), average insolation at four points in the year, and cloudiness.

**Fig. S5.** (A) Validation of top-of-canopy height (TCH) modeled at the national scale using the Random Forest Machine Learning (RFML) approach and direct measurements of TCH from airborne LiDAR. (B) Decline in uncertainty of RFML-based TCH estimates with increasing TCH. This result is critically important since the majority of aboveground carbon stock is associated with vegetation heights of 15 meters or more.

**Fig. S6.** Regional distribution and density of Carnegie permanent field calibration-validation plot network in Perú. Circle locations indicate the centroid of each cluster of inventory plots; Circle colors indicate general forest type and condition; Elevation map indicates the partitioning of plots in lowland (blue-green), submontane (yellow) and montane (red) conditions.

**Fig. S7.** Calibration of airborne LiDAR-based measurements of top-of-canopy height (TCH) against field-based estimates of aboveground carbon density (ACD) in lowland, submontane and montane vegetation throughout Perú.

**Fig. S8.** Validation of nationally mapped estimates of aboveground carbon density (ACD) versus field plot inventory estimates of ACD for sites across Northern, Central and Southern Perú.

**Fig. S9.** Estimated percentage uncertainty of aboveground carbon density at one-hectare resolution for the country of Perú. See Fig. 1 of main text for the mean estimates of ACD associated with these uncertainty estimates.

**Fig. S10.** Zoom images of aboveground carbon density (ACD) to highlight natural sources of extreme variation, such as (A) Amazon river floodplain dynamics; (B) Prevalence of bamboo in Southern Peruvian Amazon forests; and (C) Dissipation of carbon stocks toward treeline in the Andes.

**Fig. S11.** Zoom images of aboveground carbon density (ACD) to highlight human-dominated sources of variation, such as (A) Deforestation and forest degradation around the city of Puerto Maldonado in Madre de Dios; (B) Deforestation along the Iquitos-Nauta road in Loreto; and (C) Massive areas of deforestation and land conversion outside of the city of Pucallpa in Ucayali.

**Fig. S12.** Zoom images from the high-resolution aboveground carbon map of Perú highlighting regions shown in yellow boxes of Fig. 3 (main text). These include areas threatened by oil palm plantations and gold mining in the central and northern Peruvian Amazon, as well as areas of protection in Brazil nut and rubber tree extractive reserves in southern Perú.

**Fig. S13.** Relationship between the size of protected areas in Perú and their total carbon stored above ground.

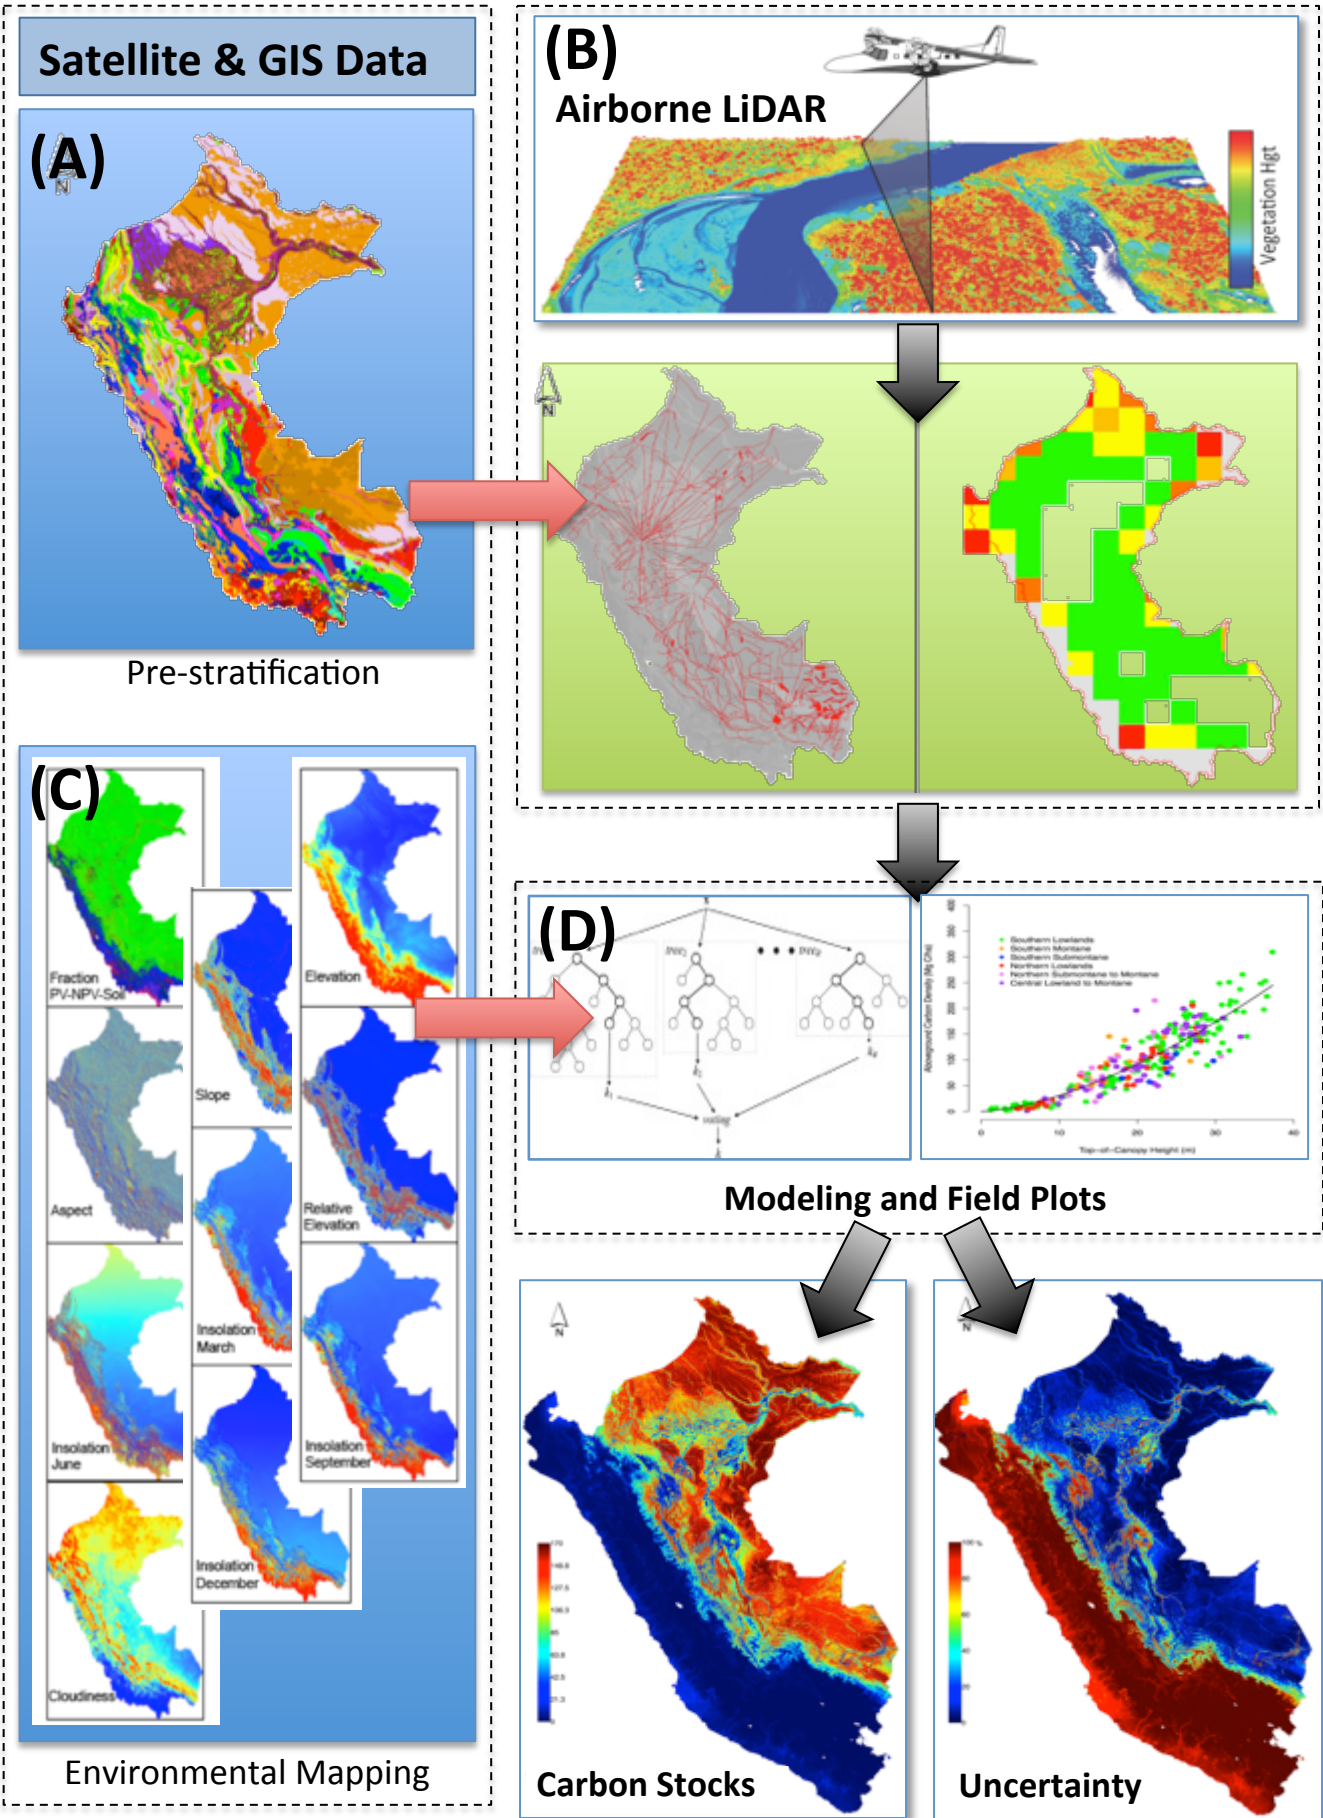

Fig. S1

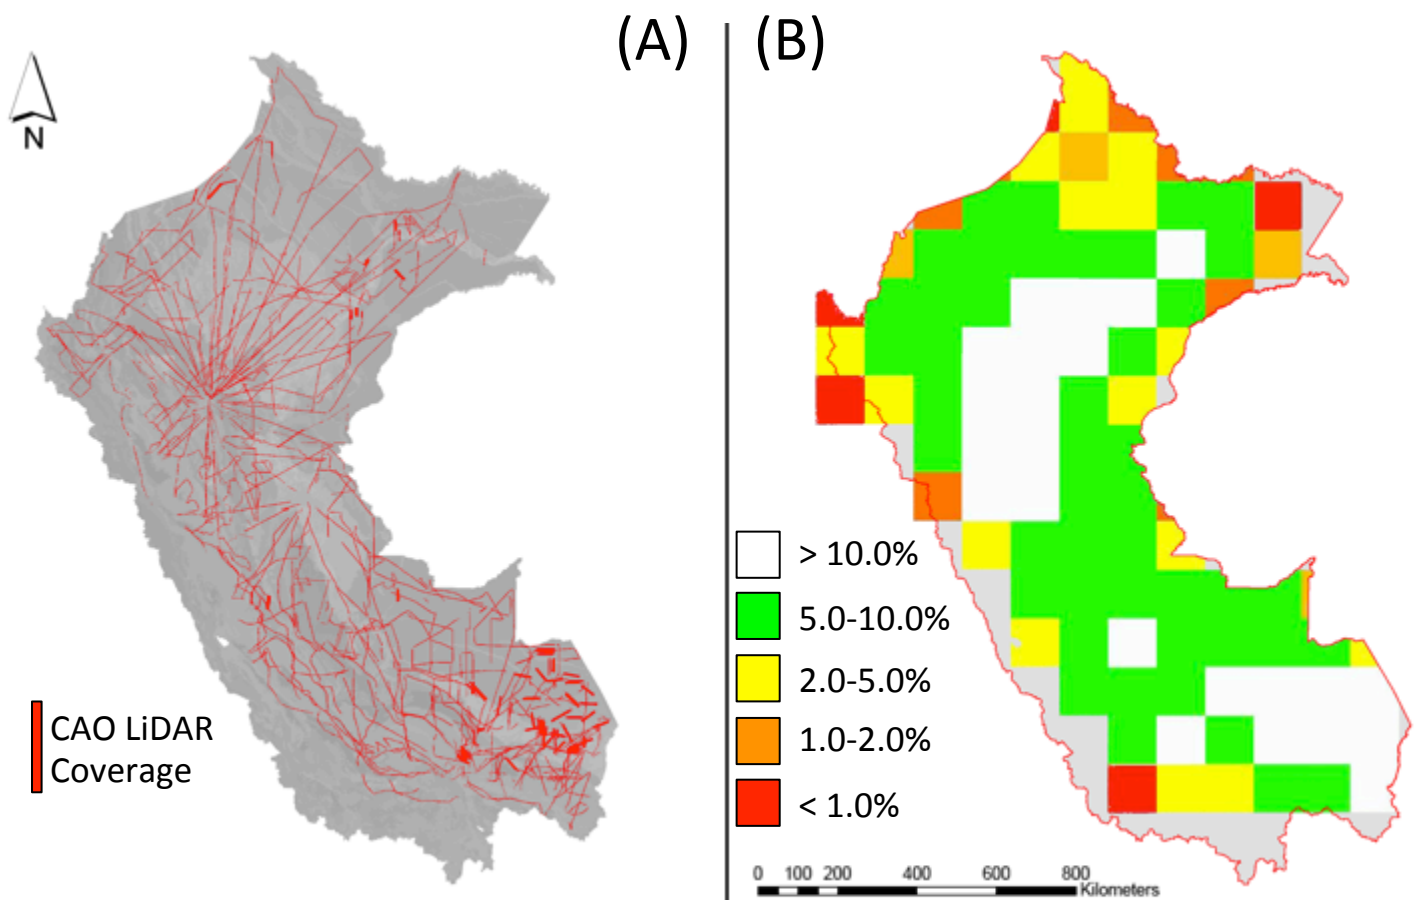

Fig. S2

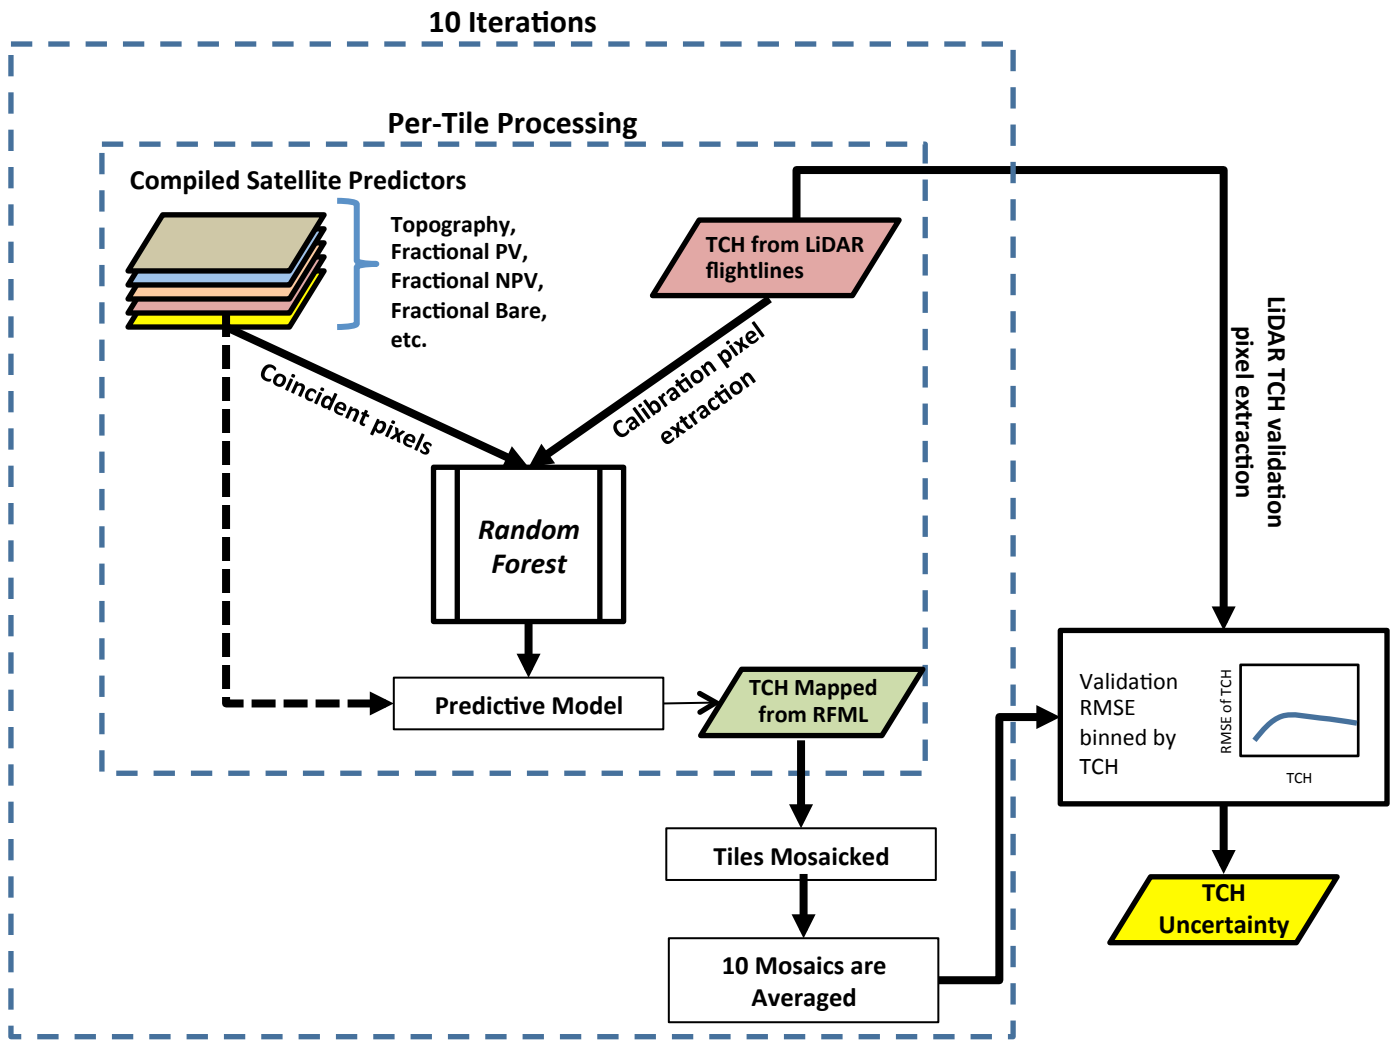

Fig. S3



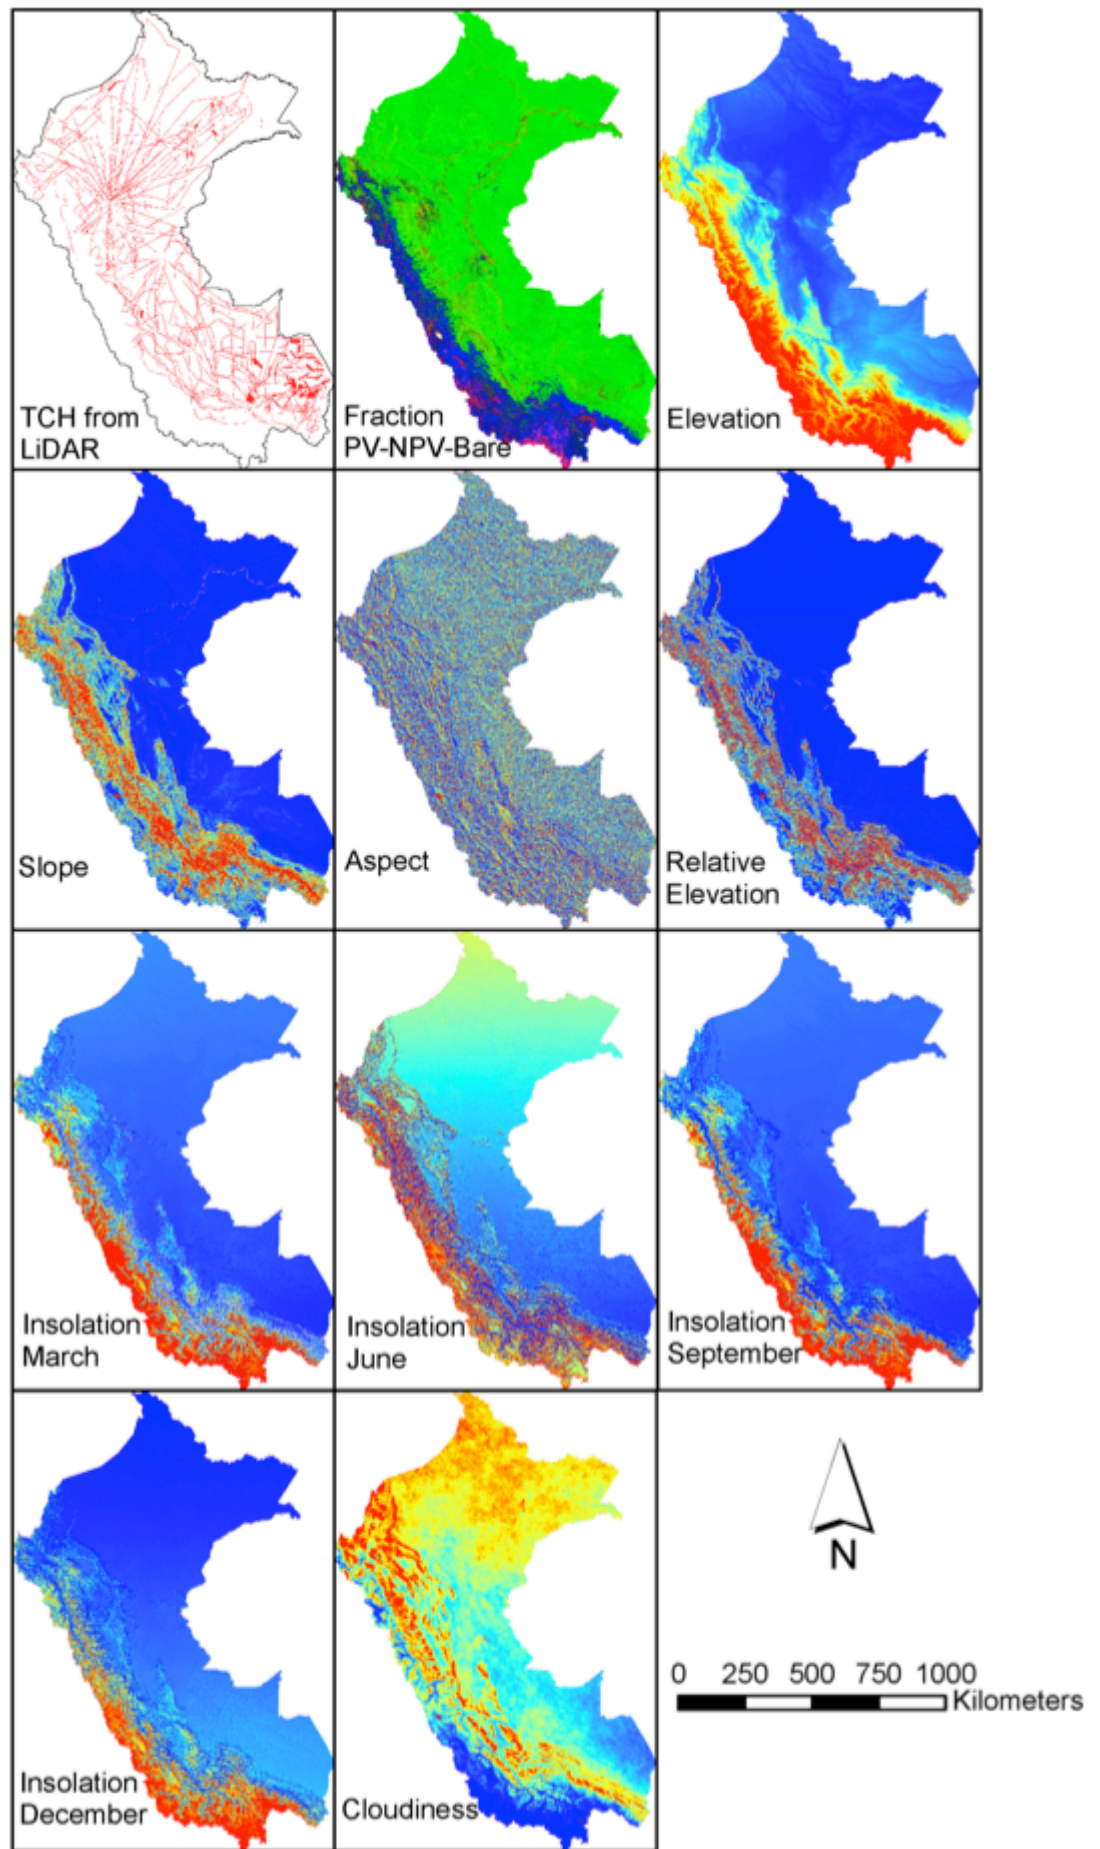

Fig. S4

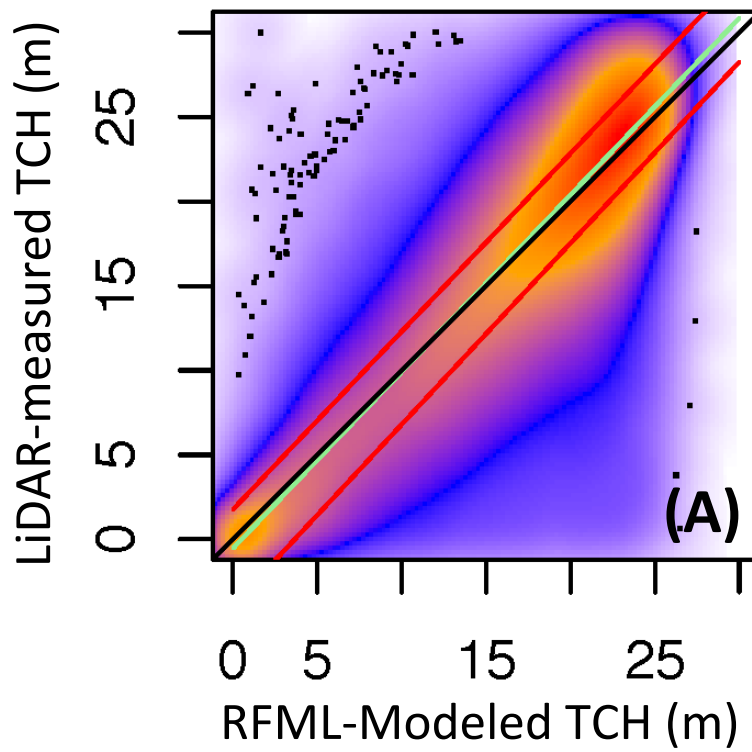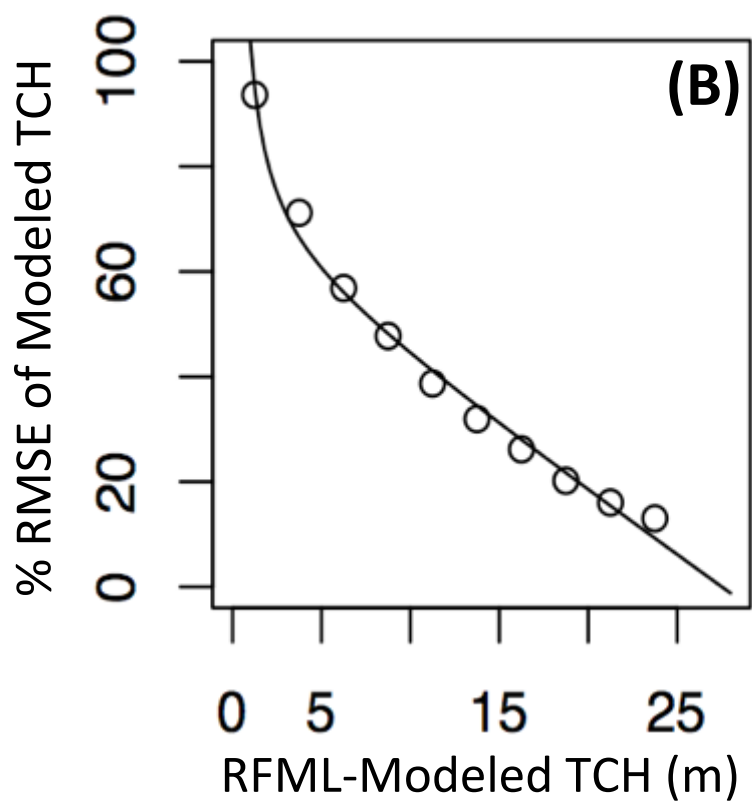

Fig. S5



# Carnegie Institution Permanent Plot Network

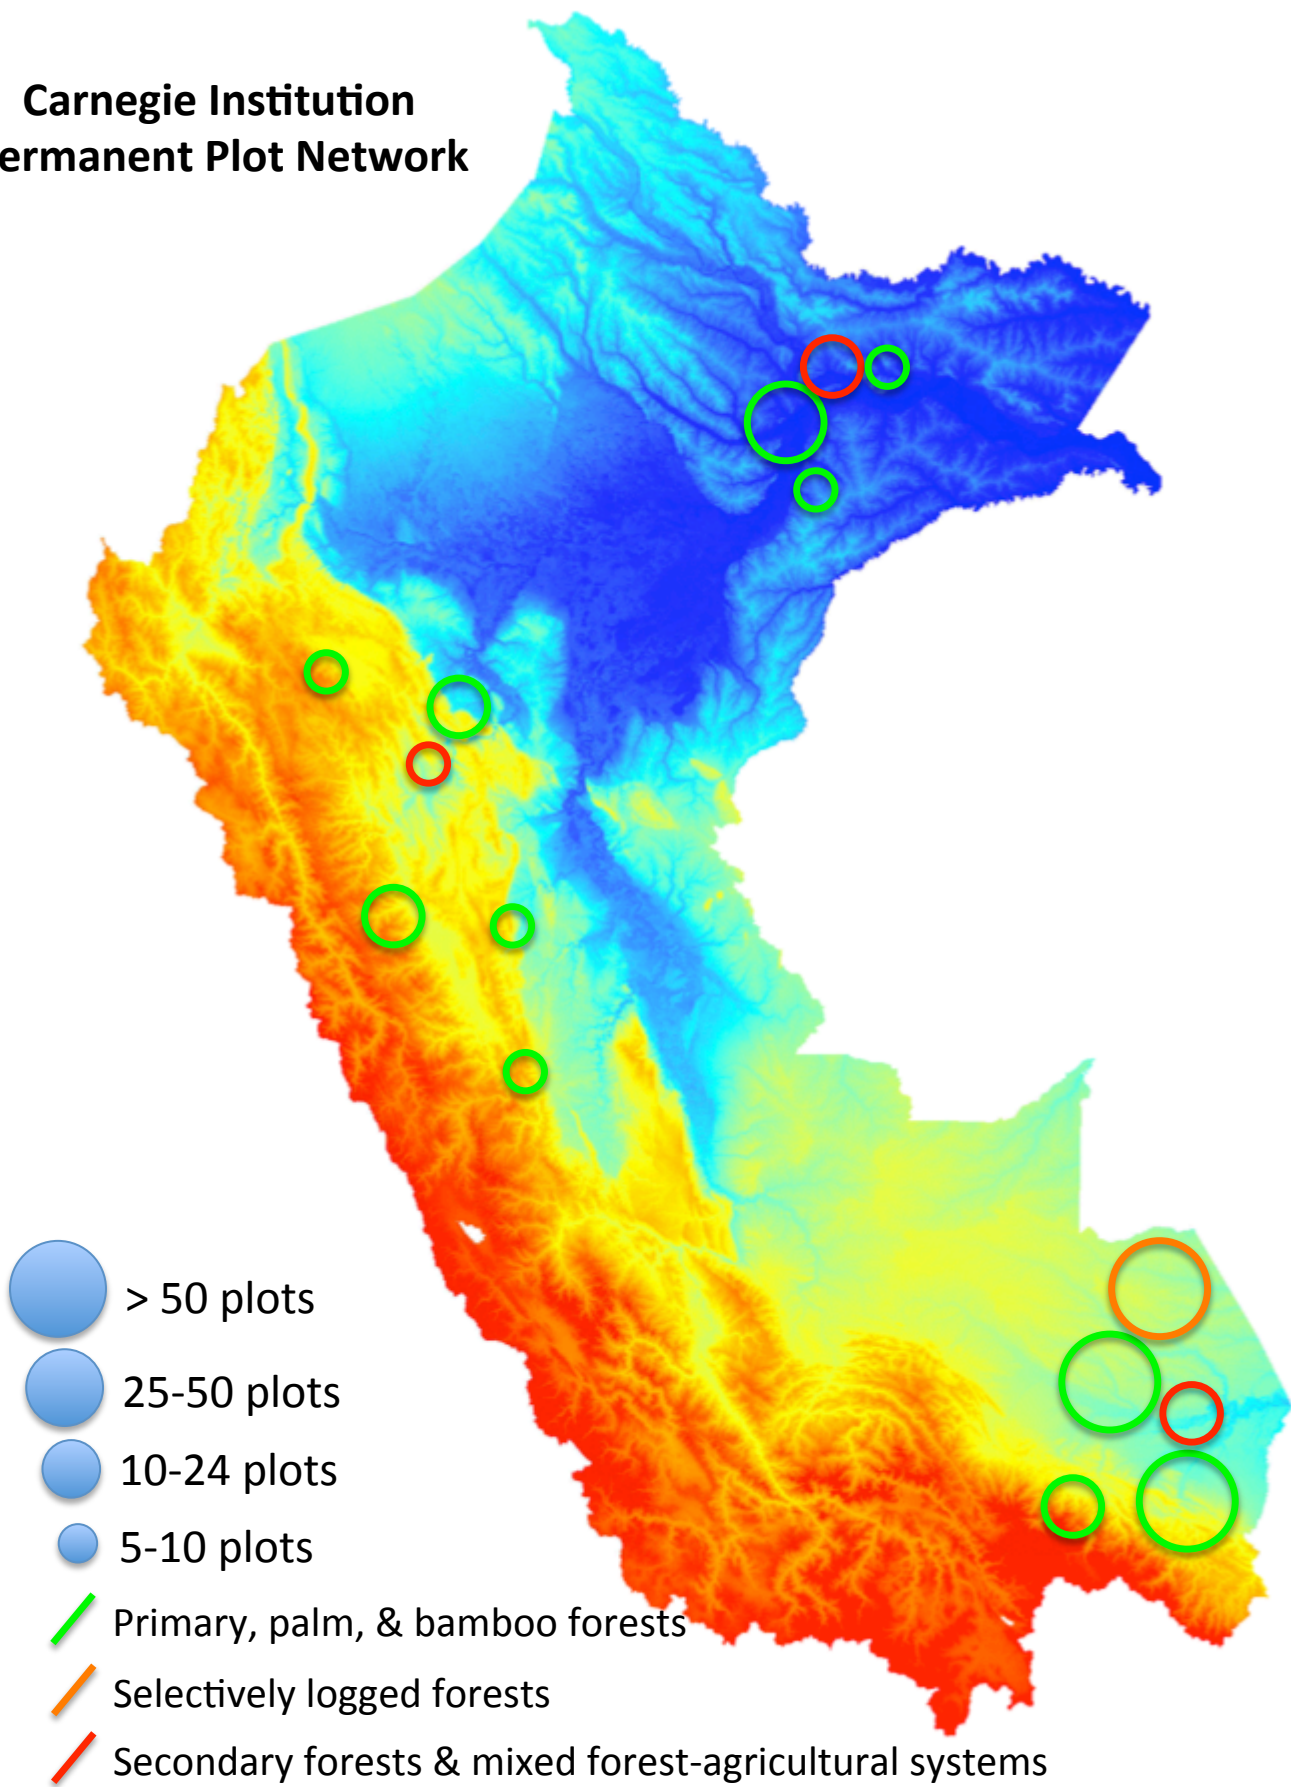

Fig. S6

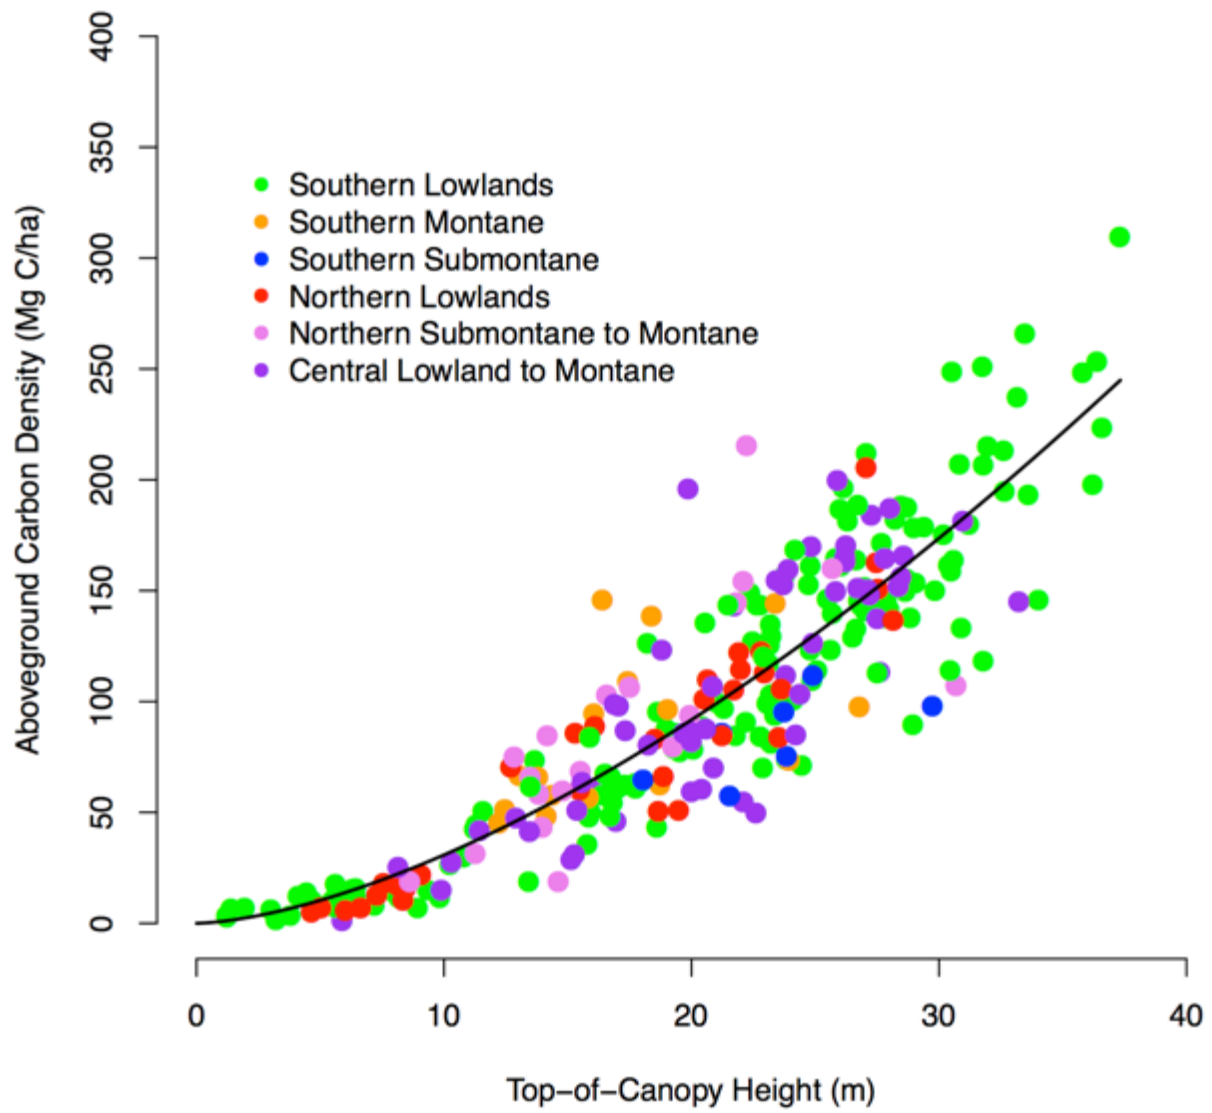

Fig. S7

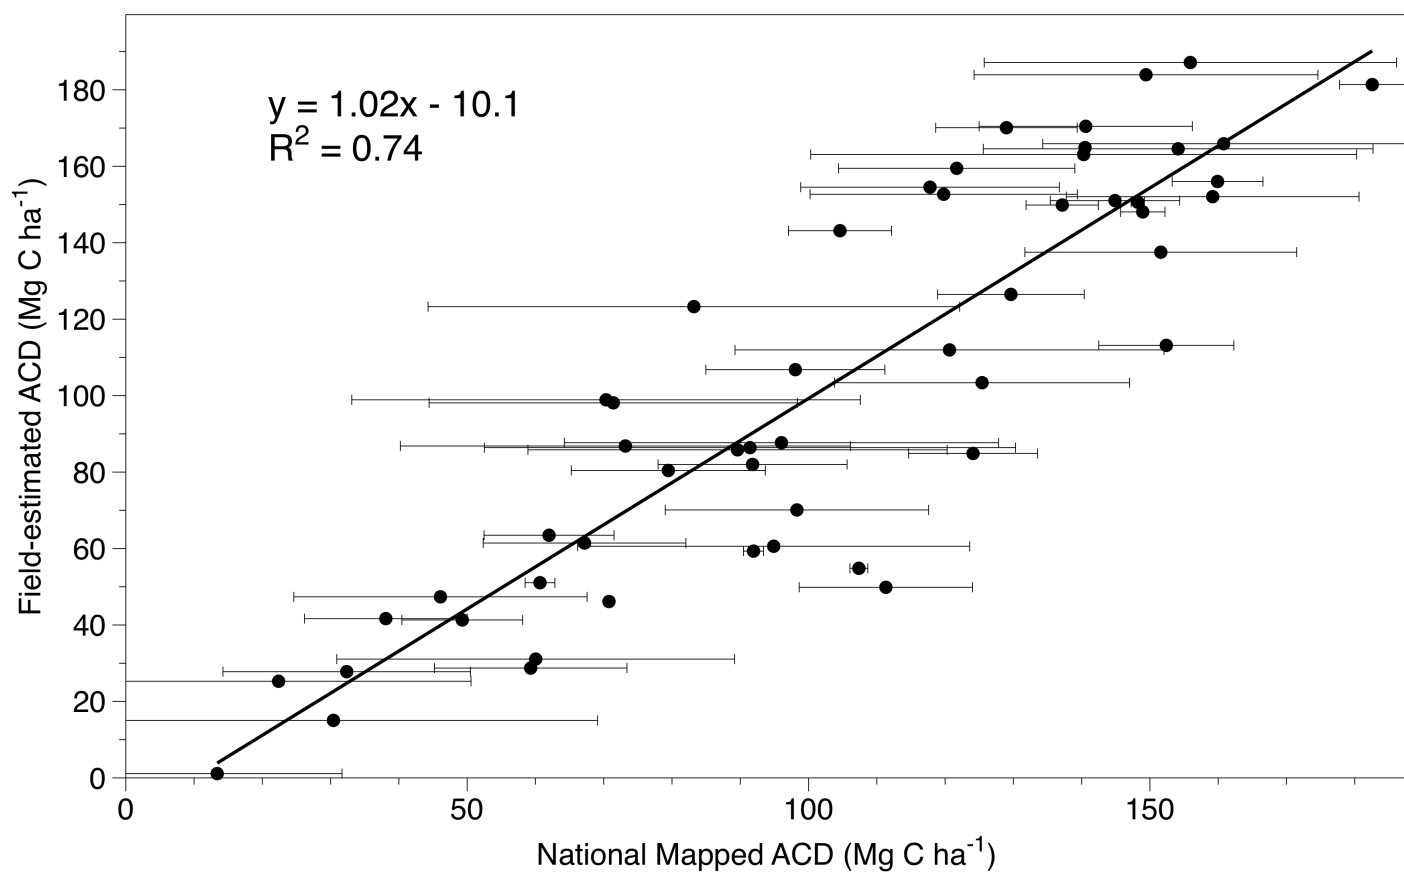

Fig. S8

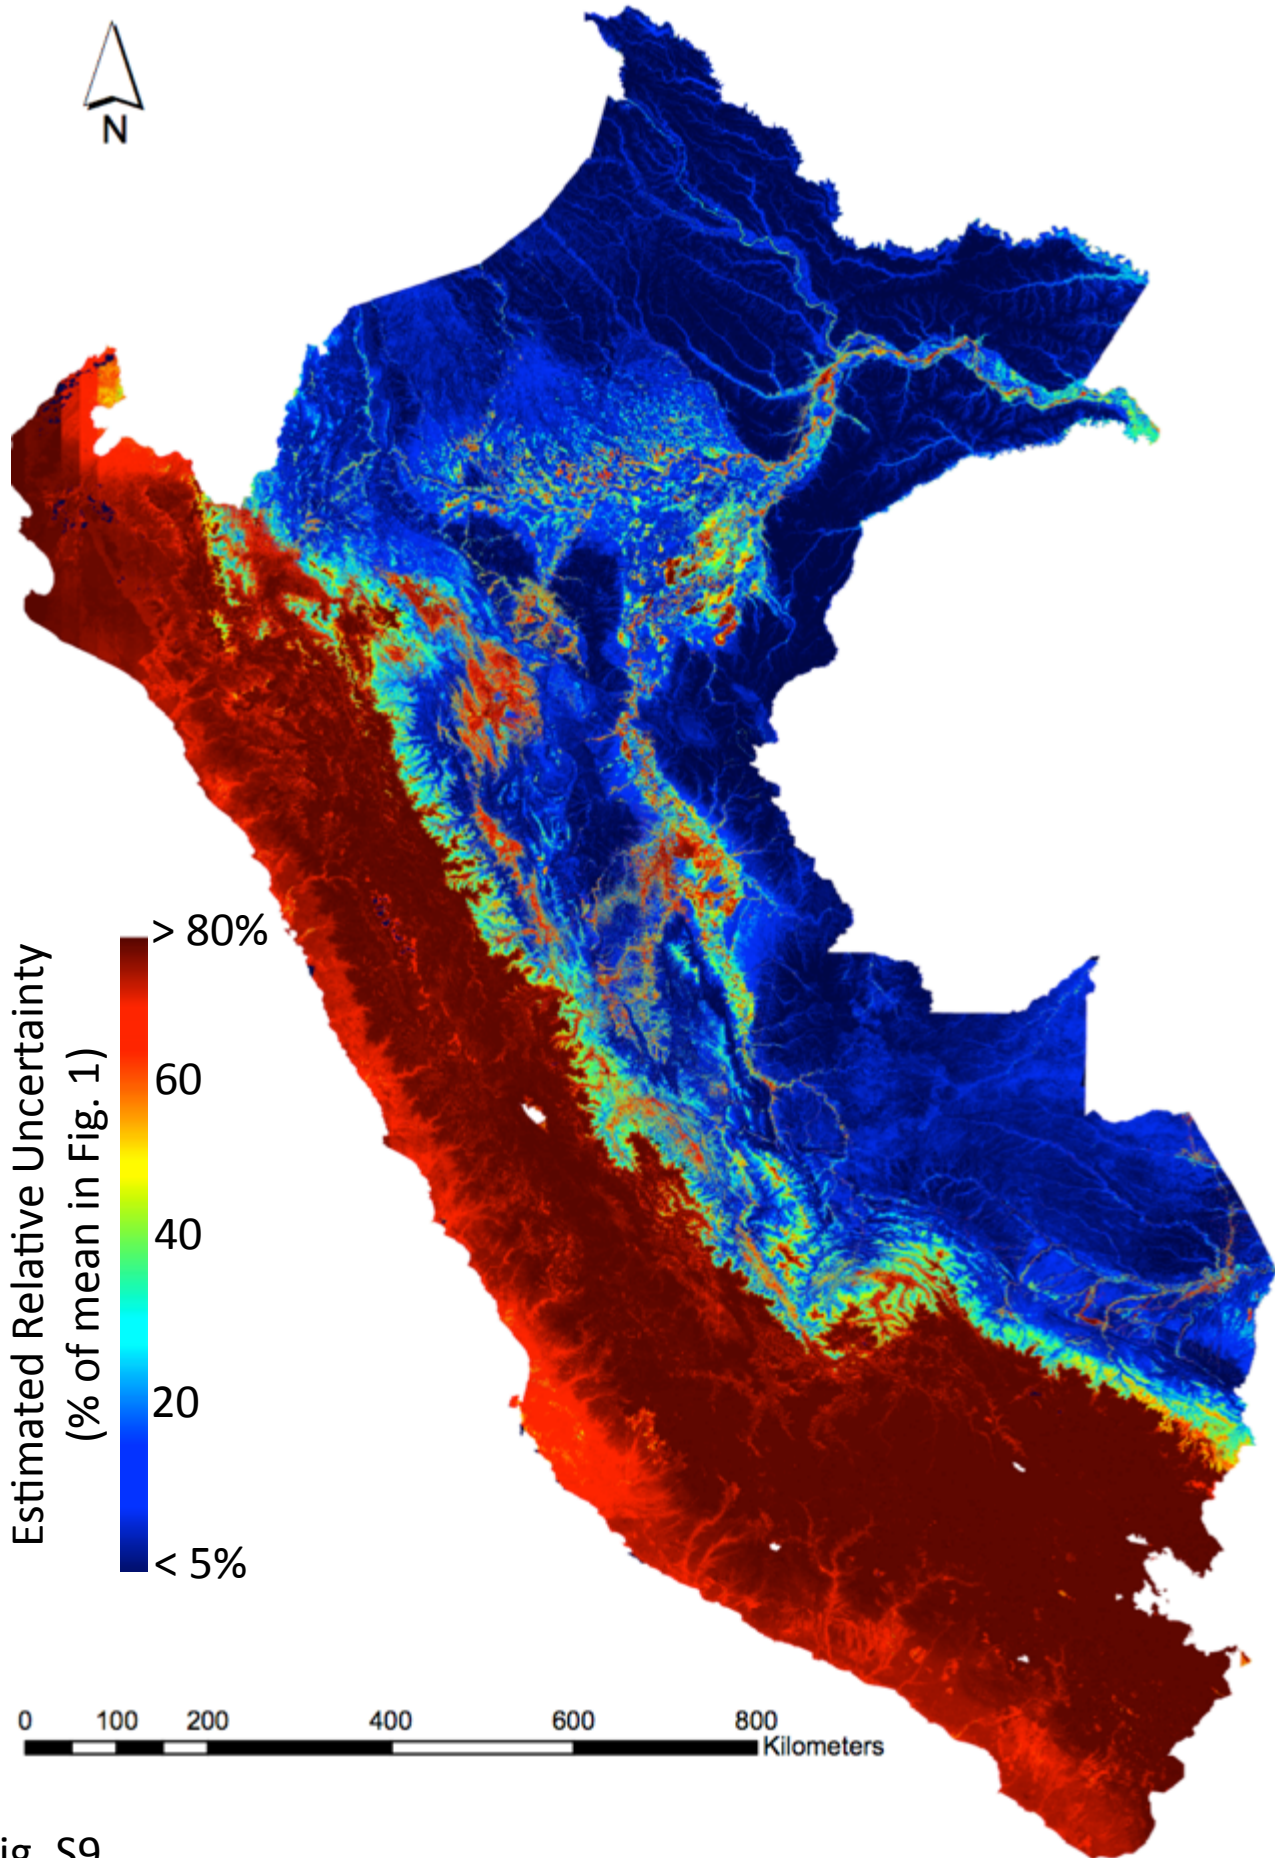

Fig. S9



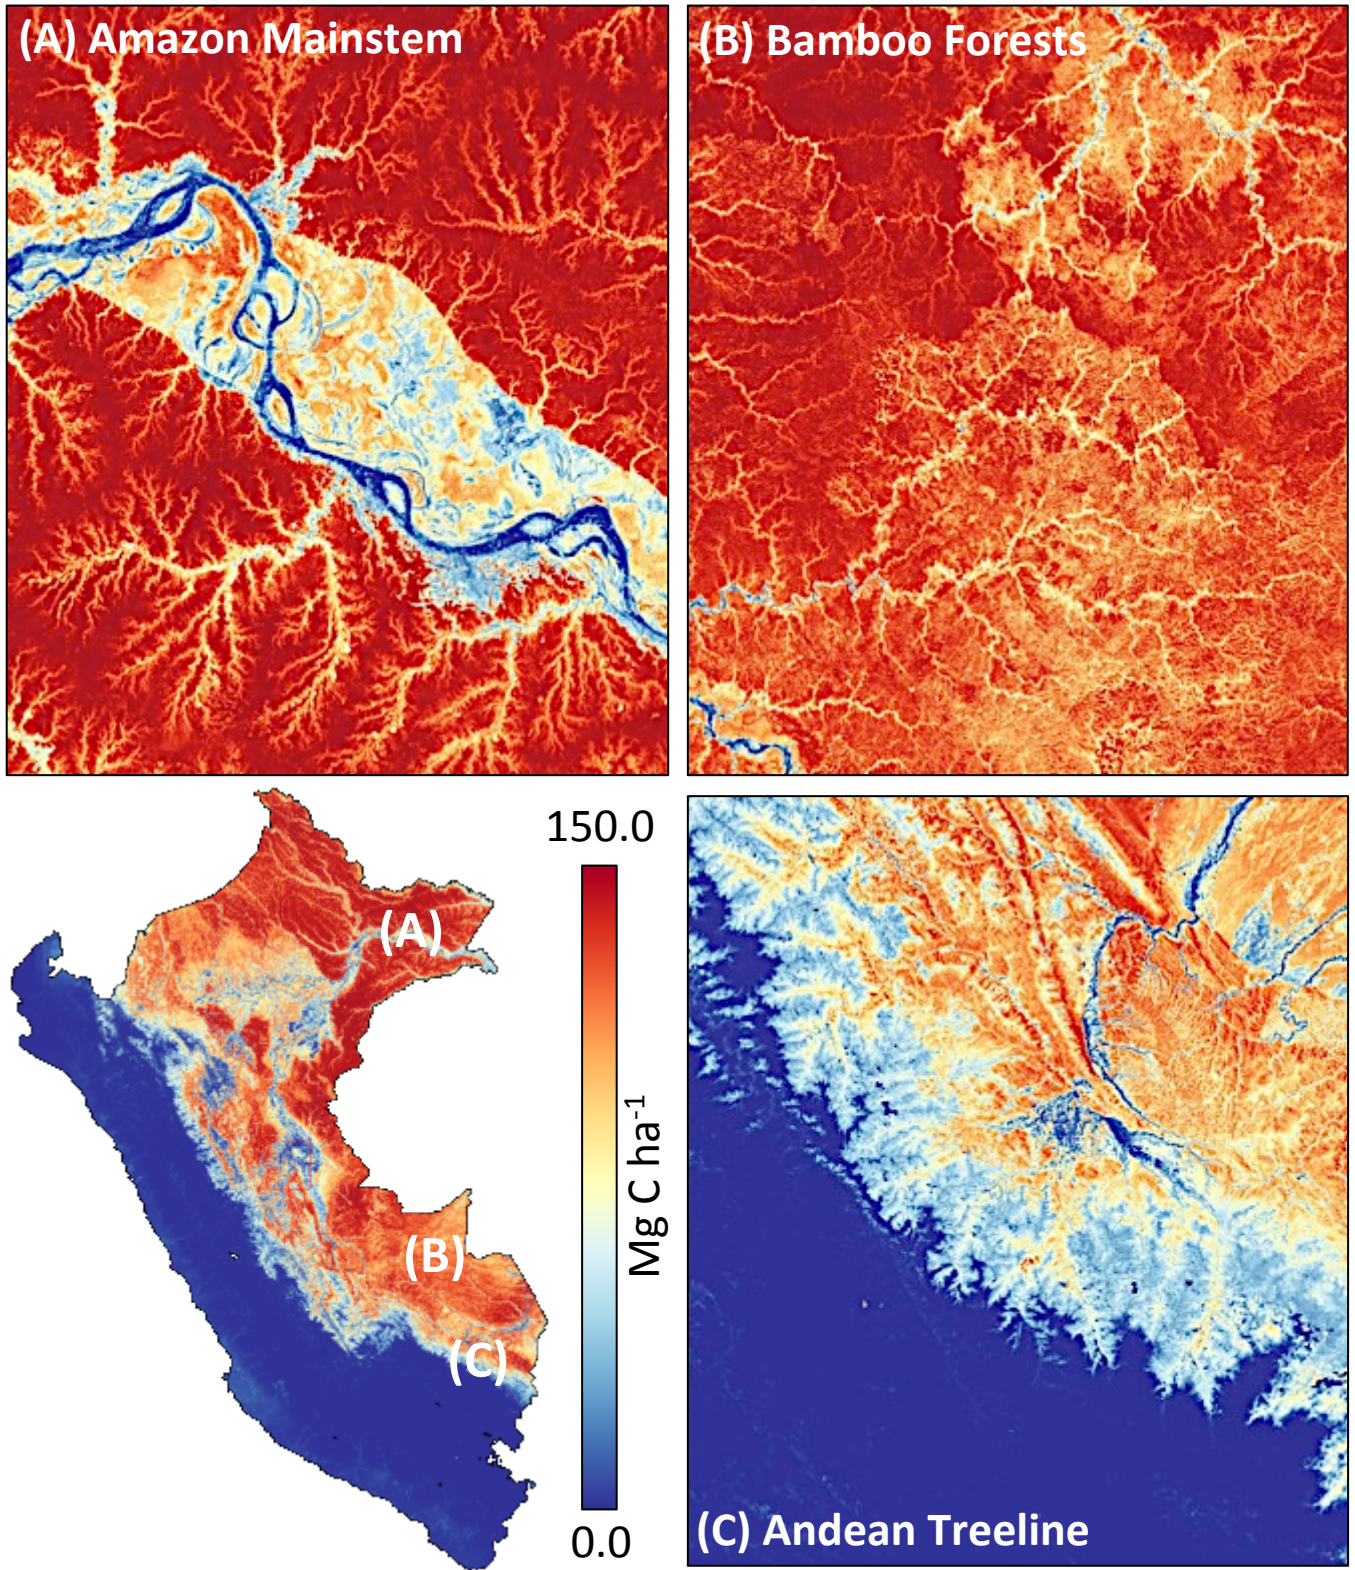

Fig. S10



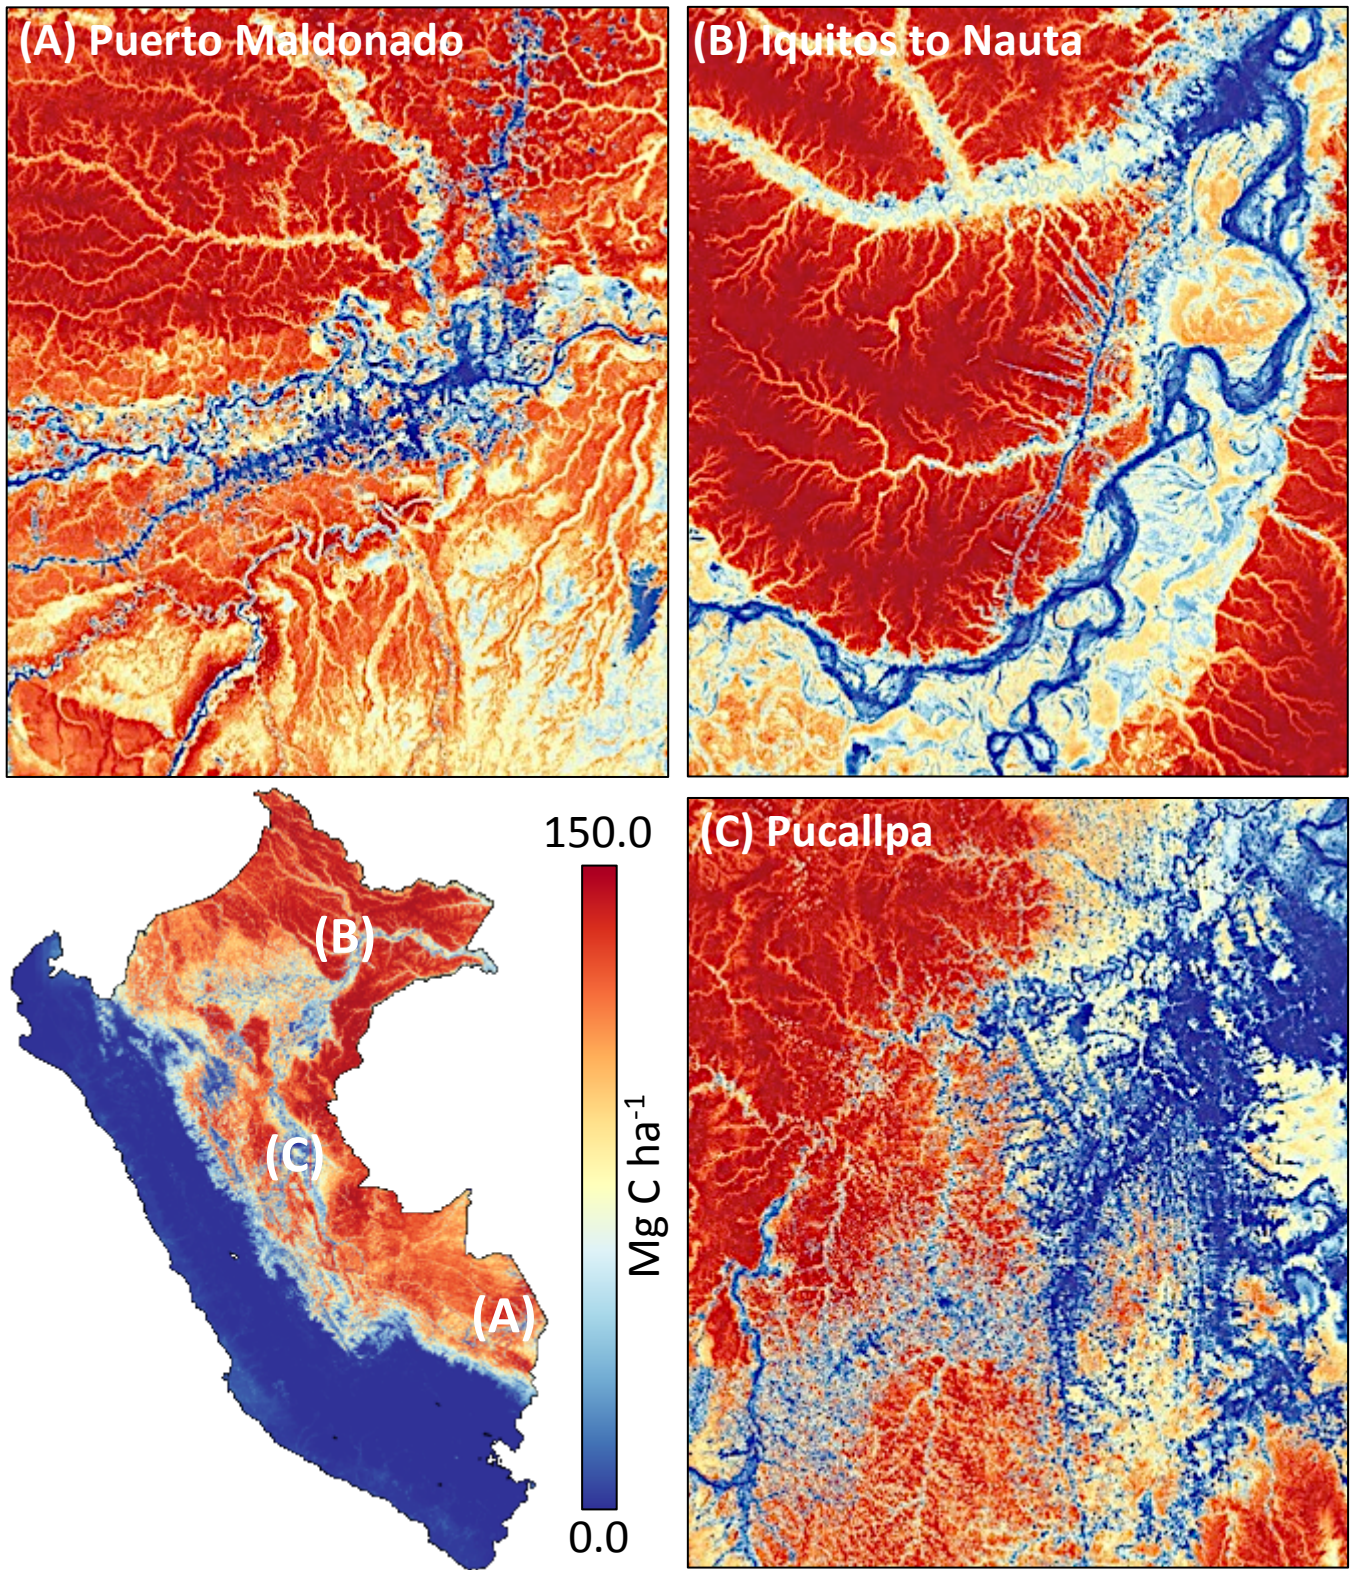

Fig. S11



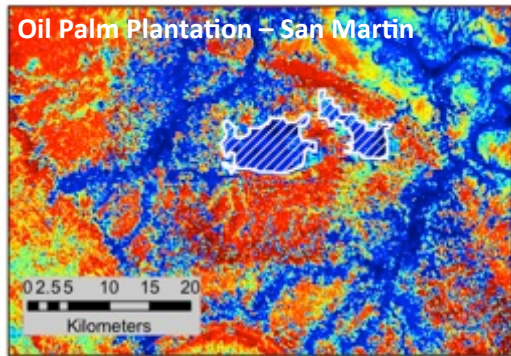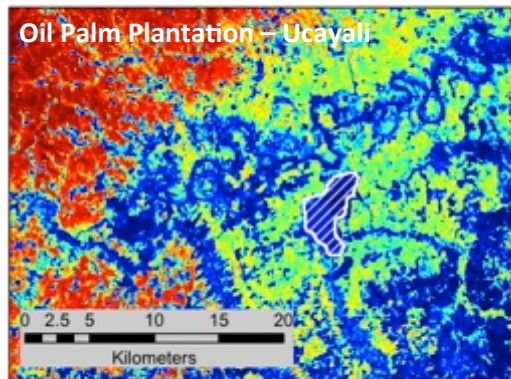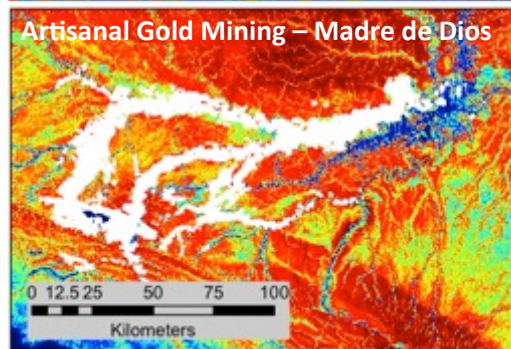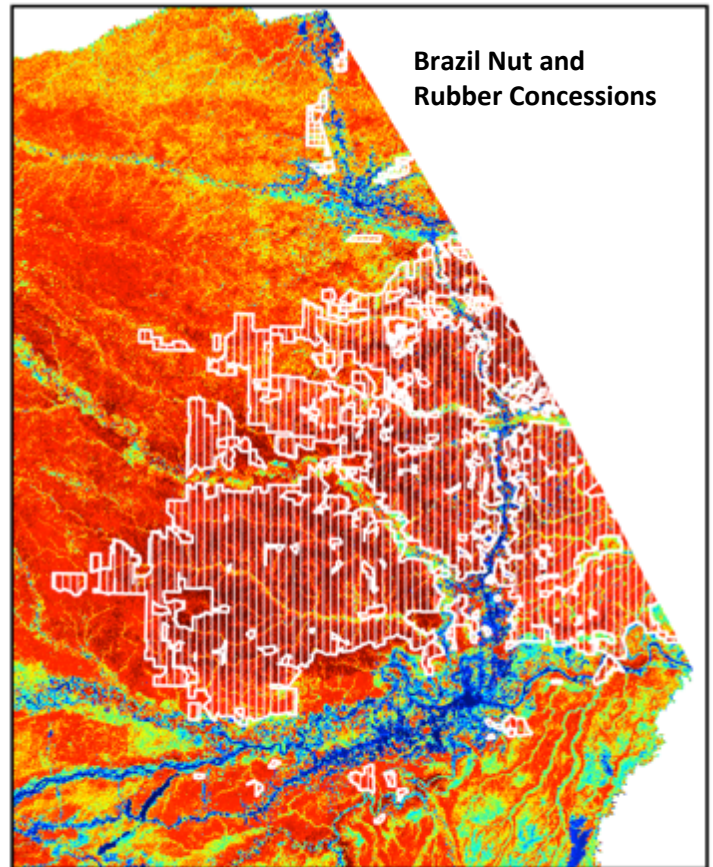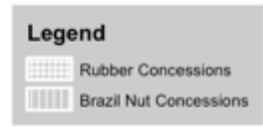

Fig. S12

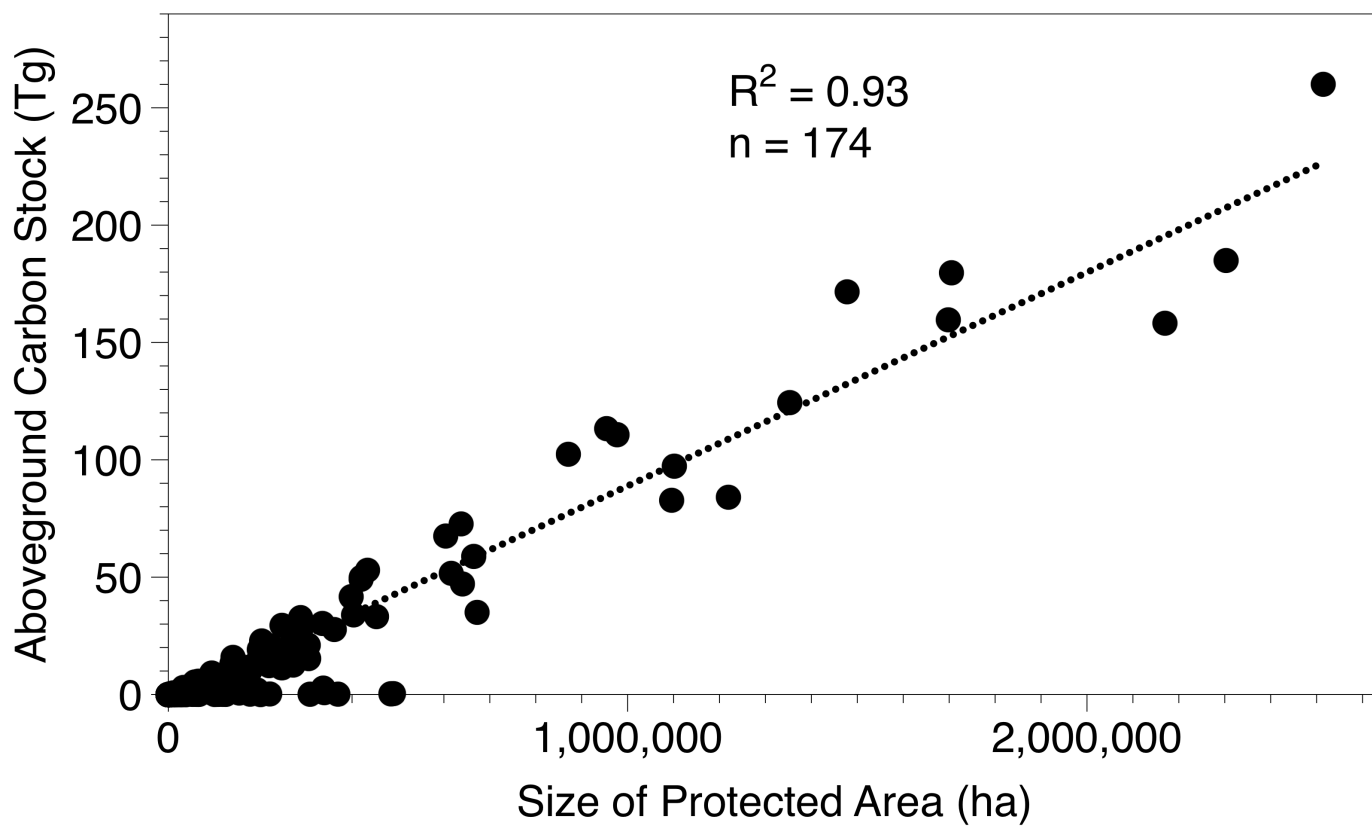



**Table S1.** Mean and standard deviation of aboveground carbon density, and total aboveground carbon stock, for government and non-government administered protected areas in Perú. SD = standard deviation. Tg = Teragram = one million metric tons.

| Name                                     | Type | Area (ha) | Mean Carbon Density (Mg C ha <sup>-1</sup> ) | SD of Carbon Density (Mg C ha <sup>-1</sup> ) | Total Carbon Stock (Tg C) |
|------------------------------------------|------|-----------|----------------------------------------------|-----------------------------------------------|---------------------------|
| A.B. del Canal Nuevo Imperial            | 4    | 17        | 13.7                                         | 3.64                                          | <0.001                    |
| Abra Malaga                              | 8    | 1032      | 18.54                                        | 16.54                                         | 0.019                     |
| Abra Malaga Thastayoc-Royal Cinclodes    | 8    | 74        | 0.76                                         | 0.75                                          | <0.001                    |
| Abra Patricia-Alto Nieva                 | 8    | 1423      | 56.98                                        | 8.35                                          | 0.081                     |
| Airo Pai                                 | 3    | 247884    | 119.29                                       | 15.22                                         | 29.547                    |
| Albufera de Medio Mundo                  | 8    | 685       | 6.08                                         | 2.38                                          | 0.003                     |
| Allpahuayo Mishana                       | 2    | 58084     | 93.38                                        | 25.33                                         | 5.424                     |
| Alto Mayo                                | 4    | 177740    | 57.89                                        | 24.12                                         | 10.009                    |
| Alto Nanay-Pintuyacu Chambira            | 8    | 954646    | 118.75                                       | 11.57                                         | 113.361                   |
| Alto Purus                               | 1    | 2514786   | 103.73                                       | 11.36                                         | 260.091                   |
| Amarakaeri                               | 3    | 403828    | 84.18                                        | 20.1                                          | 33.975                    |
| Amazon Natural Park                      | 8    | 64        | 81.96                                        | 25.34                                         | 0.005                     |
| Amazon Shelter                           | 8    | 12        | 38                                           | 14.56                                         | <0.001                    |
| Ampay                                    | 5    | 3847      | 4.48                                         | 5.56                                          | 0.017                     |
| Ampiyacu Apayacu                         | 8    | 434182    | 122.15                                       | 10.59                                         | 53.037                    |
| Ancon                                    | 7    | 2186      | 11.26                                        | 5.65                                          | 0.000                     |
| Angostura-Faical                         | 8    | 8868      | 16.13                                        | 2.81                                          | 0.143                     |
| Ashaninka                                | 3    | 184462    | 66.6                                         | 27.26                                         | 12.271                    |
| Bahuaja                                  | 8    | 6         | 65.16                                        | 42.64                                         | 0.000                     |
| Bahuaja Sonene                           | 1    | 1102039   | 88.39                                        | 25.55                                         | 97.372                    |
| Berlin                                   | 8    | 61        | 40.88                                        | 9.03                                          | 0.002                     |
| Boa Wadack Dari                          | 8    | 23        | 76.53                                        | 14.48                                         | 0.002                     |
| Bosque Benjamin I                        | 8    | 28        | 98.09                                        | 17.43                                         | 0.003                     |
| Bosque Benjamin II                       | 8    | 29        | 107.96                                       | 14.14                                         | 0.003                     |
| Bosque Benjamin III                      | 8    | 24        | 69.5                                         | 18.92                                         | 0.002                     |
| Bosque de Palmeras de la Comunidad Campe | 8    | 5925      | 4.12                                         | 1.74                                          | 0.024                     |
| Bosque de Pomac                          | 6    | 10919     | 31.7                                         | 17.35                                         | 0.346                     |
| Bosque de Puya Raymond-Titankayocc       | 8    | 6265      | 0.64                                         | 1.01                                          | 0.004                     |
| Bosque de Zarate                         | 7    | 546       | 3.01                                         | 1.56                                          | 0.002                     |
| Bosque Huacrupe-La Calera                | 8    | 7327      | 2.39                                         | 0.64                                          | 0.017                     |
| Bosque Moyan-Palacio                     | 8    | 8527      | 2.46                                         | 1.17                                          | 0.021                     |
| Bosque Nublado                           | 8    | 3372      | 48.59                                        | 14.1                                          | 0.164                     |
| Bosque Seco Amotape                      | 8    | 125       | 4.54                                         | 0.45                                          | 0.001                     |
| Bosques de Neblina y Paramos de Samanga  | 8    | 2906      | 12.02                                        | 12.42                                         | 0.035                     |
| Bosques Nublados de Udim Sector Centro   | 8    | 73        | 3.37                                         | 2.17                                          | 0.000                     |

|                                              |   |         |        |       |         |
|----------------------------------------------|---|---------|--------|-------|---------|
| Bosques Nublados de Udimá Sector Norte       | 8 | 2273    | 2.36   | 1.16  | 0.005   |
| Bosques Nublados de Udimá Sector Sur         | 8 | 9889    | 10.15  | 7.87  | 0.100   |
| Bosques Secos Salitral-Huarmaca Sector Norte | 8 | 3703    | 2.35   | 1.33  | 0.009   |
| Bosques Secos Salitral-Huarmaca Sector Sur   | 8 | 25319   | 1.92   | 0.56  | 0.049   |
| Calipuy                                      | 2 | 4499    | 1.21   | 0.95  | 0.005   |
| Calipuy                                      | 5 | 64099   | 1.76   | 1.56  | 0.112   |
| Camino Verde Baltimore                       | 8 | 20      | 109.92 | 13.23 | 0.002   |
| Canoncillo                                   | 8 | 1506    | 4.59   | 1.3   | 0.007   |
| Cerros de Amotape                            | 1 | 152933  | 12.56  | 6.57  | 1.921   |
| Chacamarca                                   | 6 | 2436    | 0.38   | 1.4   | 0.001   |
| Chancaybanos                                 | 7 | 2659    | 4.33   | 2.13  | 0.012   |
| Chaparrí                                     | 8 | 40524   | 2.13   | 1.02  | 0.086   |
| Chayu Nafn                                   | 3 | 23620   | 57.53  | 21.15 | 1.303   |
| Checca                                       | 8 | 563     | 0.09   | 0.03  | <0.001  |
| Choquechaca                                  | 8 | 2071    | 1.81   | 2.55  | 0.004   |
| Choquequirao                                 | 8 | 103803  | 7.7    | 10.94 | 0.789   |
| Comunal Tamshiyacu Tahuayo                   | 8 | 420071  | 117.01 | 17.67 | 49.153  |
| Copallín                                     | 8 | 11566   | 31.98  | 16.68 | 0.370   |
| Cordillera Azul                              | 1 | 1353375 | 91.97  | 21.82 | 124.463 |
| Cordillera de Colón                          | 5 | 39232   | 53.66  | 21.57 | 2.105   |
| Cordillera Escalera                          | 8 | 150568  | 77.77  | 21.28 | 11.709  |
| Cordillera Huayhuash                         | 7 | 67570   | 2.93   | 2.46  | 0.197   |
| Cutervo                                      | 1 | 8231    | 28.17  | 16.75 | 0.232   |
| De la Pampa de Ayacucho                      | 6 | 298     | 1.41   | 2.94  | <0.001  |
| El Angolo                                    | 8 | 65979   | 2.19   | 1.91  | 0.144   |
| El Gato                                      | 8 | 44      | 76.27  | 16.26 | 0.003   |
| El Sira                                      | 3 | 616380  | 83.88  | 29.03 | 51.700  |
| Gneppf-Sekime                                | 8 | 203676  | 112.44 | 15.11 | 22.874  |
| Gotas de Agua I                              | 8 | 3       | 2.29   | 0.32  | <0.001  |
| Gotas de Agua II                             | 1 | 9       | 2.44   | 0.48  | <0.001  |
| Habana Rural Inn                             | 8 | 29      | 55.99  | 15.11 | 0.002   |
| Hatun Queuna - Quishuarani Ccollana          | 8 | 232     | 0.57   | 0.52  | <0.001  |
| Herman Dantas                                | 8 | 49      | 112.55 | 17.93 | 0.006   |
| Hierba Buena - Allpayacu                     | 8 | 2282    | 34.9   | 14.21 | 0.080   |
| Huamanmarca-Ochuro-Tumpullo                  | 8 | 15680   | 0.29   | 0.35  | 0.005   |
| Huascaran                                    | 1 | 339991  | 2.66   | 3.37  | 0.848   |
| Huaylla Belén-Colcamar                       | 8 | 6341    | 20.5   | 18.89 | 0.130   |
| Huayllapa                                    | 8 | 21043   | 2.87   | 2.29  | 0.060   |
| Huayllay                                     | 5 | 6737    | 0.38   | 0.42  | 0.003   |
| Huaytapallana                                | 8 | 22384   | 3      | 4.54  | 0.067   |
| Huimeki                                      | 3 | 141258  | 112.48 | 16.45 | 15.888  |
| Huiquilla                                    | 8 | 1139    | 23.1   | 15.73 | 0.026   |
| Humedales de Puerto Viejo                    | 7 | 276     | 5.8    | 2.19  | 0.002   |

|                                     |   |         |        |       |         |
|-------------------------------------|---|---------|--------|-------|---------|
| Humedales de Ventanilla             | 8 | 283     | 7.51   | 3.38  | 0.002   |
| Ichigkat Muja-Cordillera del Condor | 1 | 88506   | 81.51  | 16.41 | 7.111   |
| Illescas                            | 7 | 37886   | 0.42   | 0.16  | 0.016   |
| Imiria                              | 8 | 135655  | 33.93  | 24.49 | 4.603   |
| Inotawa-1                           | 8 | 57      | 104.44 | 25.7  | 0.006   |
| Inotawa-2                           | 8 | 16      | 106.89 | 23.43 | 0.002   |
| Japu-Bosque Ukumari Llaqta          | 8 | 18762   | 34.81  | 23.92 | 0.645   |
| Jirishanca                          | 8 | 12085   | 2.39   | 2.25  | 0.029   |
| Junfn                               | 2 | 52561   | 5.18   | 7.2   | 0.134   |
| Juningue                            | 8 | 37      | 38.37  | 16.69 | 0.001   |
| La Huerta del Chaparri              | 8 | 50      | 1.31   | 0.82  | <0.001  |
| La Pampa del Burro                  | 8 | 2781    | 53.82  | 10.97 | 0.150   |
| Lachay                              | 2 | 5131    | 6.98   | 2.21  | 0.036   |
| Laguna de Huacachina                | 7 | 2457    | 10.25  | 0.95  | 0.025   |
| Lagunas de Mejfa                    | 5 | 726     | 10.17  | 5.15  | 0.007   |
| Laquipampa                          | 8 | 8371    | 2      | 1.48  | 0.017   |
| Larga Vista I                       | 8 | 20      | 58.19  | 15.18 | 0.001   |
| Larga Vista II                      | 8 | 25      | 52.36  | 19.67 | 0.001   |
| Las Panguanas 2                     | 8 | 1       | 122.49 | 0     | <0.001  |
| Las Panguanas 3                     | 8 | 7       | 118.2  | 4.09  | 0.001   |
| Las Panguanas 4                     | 8 | 5       | 119.18 | 3.98  | 0.001   |
| Llamac                              | 8 | 6707    | 2.13   | 2.13  | 0.014   |
| Lomas de Ancon                      | 7 | 10959   | 4.76   | 1.6   | 0.052   |
| Lomas de Atiquipa                   | 8 | 19046   | 5.62   | 2.46  | 0.107   |
| Los Chilchos                        | 8 | 45987   | 46.64  | 18.01 | 2.141   |
| Los Pantanos de Villa               | 8 | 256     | 9.21   | 3.66  | 0.002   |
| Machiguenga                         | 3 | 218926  | 80.3   | 26.59 | 17.549  |
| Machupicchu                         | 6 | 37300   | 10.66  | 13.04 | 0.396   |
| Manglares de Tumbes                 | 5 | 3004    | 14.09  | 4.32  | 0.041   |
| Mantanay                            | 8 | 361     | 2.53   | 3.42  | 0.001   |
| Manu                                | 1 | 1698526 | 94.06  | 26.14 | 159.718 |
| Matses                              | 2 | 420596  | 118.83 | 19.18 | 49.978  |
| Megantoni                           | 5 | 215854  | 60.76  | 27.69 | 13.116  |
| Microcuena de Paria                 | 8 | 767     | 3.24   | 2.43  | 0.002   |
| Milpuj-La Heredad                   | 8 | 16      | 2.06   | 0.6   | <0.001  |
| Nor Yauyos-Cochas                   | 8 | 221252  | 1.36   | 2.23  | 0.302   |
| Nuevo Amanecer                      | 8 | 30      | 116.75 | 20.77 | 0.004   |
| Otishi                              | 1 | 305979  | 50.75  | 22.89 | 15.391  |
| Pacaya Samiria                      | 2 | 2170219 | 72.94  | 29.17 | 158.286 |
| Pacllon                             | 8 | 14793   | 2.25   | 2.03  | 0.033   |
| Pagaibamba                          | 4 | 2038    | 11.5   | 7.15  | 0.023   |
| Pampa Galeras Barbara DAchille      | 2 | 8008    | 0.21   | 0.08  | 0.002   |
| Pampa Hermosa                       | 5 | 11541   | 40.68  | 18.97 | 0.469   |

|                                        |   |         |        |       |         |
|----------------------------------------|---|---------|--------|-------|---------|
| Pampacorral                            | 8 | 764     | 0.43   | 0.99  | <0.001  |
| Panguana                               | 8 | 132     | 82.93  | 21.19 | 0.011   |
| Paracas                                | 2 | 335432  | 12.47  | 3.47  | 1.389   |
| Paraiso Natural Iwirati                | 8 | 101     | 93.75  | 13.71 | 0.009   |
| Pillco Grande-Bosque de Pumataki       | 8 | 275     | 6.77   | 7.57  | 0.002   |
| Pta Salinas-Isla Huampano-Isla Mazorca | 2 | 13686   | 2.6    | 1.06  | <0.001  |
| Pucacuro                               | 2 | 637916  | 114.09 | 11.17 | 72.758  |
| Pucunucho                              | 8 | 22      | 25.17  | 9.22  | 0.001   |
| Pui Pui                                | 4 | 54509   | 9.62   | 16.08 | 0.508   |
| Punta Atico                            | 2 | 3451    | 12.21  | 6.33  | 0.001   |
| Punta Coles                            | 2 | 3389    | 10.34  | 5.92  | 0.002   |
| Punta Colorado                         | 2 | 2190    | 6.44   | 0.43  | <0.001  |
| Punta Culebras                         | 2 | 2932    | 4.71   | 1.32  | <0.001  |
| Punta Hornillos                        | 2 | 2772    | 13.01  | 4.77  | 0.001   |
| Punta La Chira                         | 2 | 2448    | 8.45   | 3.13  | <0.001  |
| Punta La Litera                        | 2 | 2043    | 8.77   | 0.84  | 0.001   |
| Punta Lomas                            | 2 | 2398    | 16.25  | 2.3   | <0.001  |
| Puquio Santa Rosa                      | 4 | 68      | 8.09   | 2.96  | 0.001   |
| Purus                                  | 3 | 202659  | 99.03  | 11.15 | 20.050  |
| Qosqocahuarina                         | 8 | 1824    | 0.47   | 0.89  | 0.001   |
| Refugio Kerenda Homet                  | 8 | 35      | 51.54  | 15.62 | 0.002   |
| Reserva Paisajistica Cerro Khapia      | 7 | 18487   | 0.29   | 0.25  | 0.005   |
| Rio Abiseo                             | 1 | 272428  | 46.66  | 33.46 | 12.640  |
| Rio Nieva                              | 7 | 36344   | 62.77  | 15.68 | 2.281   |
| Sagrada Familia                        | 8 | 126     | 67.64  | 20.32 | 0.009   |
| Salinas y Aguada Blanca                | 2 | 369768  | 0.57   | 1.3   | 0.209   |
| San Antonio                            | 8 | 352     | 2.62   | 5.72  | 0.001   |
| San Fernando                           | 2 | 154718  | 6.43   | 2.58  | 0.713   |
| San Juan Bautista                      | 8 | 25      | 52.46  | 33.4  | 0.001   |
| San Marcos                             | 8 | 991     | 13.52  | 15.2  | 0.013   |
| San Matias San Carlos                  | 4 | 149321  | 88.26  | 27.89 | 13.180  |
| Santiago Comaina                       | 7 | 398488  | 104.75 | 15.35 | 41.720  |
| Sele Tecse-Lares Ayllu                 | 8 | 974     | 0.44   | 0.44  | <0.001  |
| Selva Botanica                         | 8 | 171     | 115.1  | 22.41 | 0.020   |
| Selva Virgen                           | 8 | 25      | 80.36  | 19.07 | 0.002   |
| Sierra del Divisor                     | 7 | 1478180 | 116.18 | 15.53 | 171.671 |
| Sub Cuenca del Cotahuasi               | 8 | 490550  | 0.92   | 1.46  | 0.450   |
| Sunchubamba                            | 8 | 61097   | 2.38   | 2.81  | 0.145   |
| Tabaconas Namballe                     | 5 | 32267   | 25.95  | 20.27 | 0.837   |
| Tambo Ilusion                          | 8 | 14      | 27.07  | 22.89 | <0.001  |
| Tambopata                              | 2 | 280234  | 89.38  | 20.22 | 25.046  |
| Taypipina                              | 8 | 659     | 0.1    | 0.05  | <0.001  |
| Tilacancha                             | 8 | 6804    | 3.8    | 7.04  | 0.026   |

|                     |   |        |        |       |         |
|---------------------|---|--------|--------|-------|---------|
| Tingo Marfa         | 1 | 4776   | 75.02  | 20.61 | 0.358   |
| Titicaca            | 2 | 36192  | 0.76   | 1.7   | 0.001   |
| Tumbes              | 2 | 19422  | 20.72  | 5.15  | 0.402   |
| Tuntanain           | 3 | 94994  | 97.49  | 16.32 | 9.261   |
| Tutusima            | 8 | 5      | 35.27  | 8.24  | <0.001  |
| Uchumiri            | 8 | 10250  | 0.29   | 0.37  | 0.003   |
| Vilacota Maure      | 8 | 125175 | 0.88   | 1.84  | 0.110   |
| Yaguas              | 7 | 871383 | 117.57 | 14.79 | 102.448 |
| Yanachaga-Chemillen | 1 | 113611 | 57.55  | 27.03 | 6.359   |
| Yanesha             | 3 | 33398  | 92.25  | 27.41 | 3.081   |

### **Non-Government Protected Areas**

|                                              |    |       |       |      |       |
|----------------------------------------------|----|-------|-------|------|-------|
| Maria Yanet Macochoa Grifa                   | 9  | 301   | 94.9  | 15.8 | 0.029 |
| Roberto Mendoza Mayta                        | 9  | 157   | 95.0  | 12.5 | 0.015 |
| Geovana Lucia Sulla Lizaraso                 | 9  | 195   | 103.4 | 12.8 | 0.020 |
| Gustavo Luis Salgado Peralta                 | 9  | 263   | 102.7 | 15.5 | 0.027 |
| Helmer Gutierrez Preza                       | 9  | 1017  | 98.9  | 14.3 | 0.101 |
| Myriam Garcia Agapito                        | 9  | 632   | 97.5  | 12.0 | 0.062 |
| Usmilda Rosambite Araujo                     | 9  | 143   | 88.5  | 13.0 | 0.013 |
| Percy Pascualvaldez Sahuarico                | 9  | 584   | 107.7 | 10.7 | 0.063 |
| Luis Alberto Garcia Agapito                  | 9  | 185   | 101.7 | 12.0 | 0.019 |
| Miriam Flores Silva                          | 9  | 732   | 101.5 | 11.6 | 0.074 |
| Concepcion Pablo Parillo Yerva               | 9  | 381   | 96.3  | 17.3 | 0.037 |
| Rosa Trinidad Cachique Vela                  | 9  | 511   | 109.0 | 19.7 | 0.048 |
| Carmen Méndez Torres                         | 9  | 1670  | 78.0  | 16.1 | 0.130 |
| Jesús Augusto Preza Pisco                    | 9  | 244   | 84.8  | 22.9 | 0.012 |
| Alfredo Silverio Aguilar Gallegos            | 9  | 201   | 84.8  | 11.7 | 0.017 |
| Aurelio Chuquitaipa Ayala                    | 9  | 209   | 89.7  | 16.4 | 0.019 |
| Jorge Raúl Chávez Masías                     | 9  | 162   | 83.6  | 18.9 | 0.014 |
| Eduardo López Huesembe                       | 9  | 1197  | 93.1  | 20.8 | 0.111 |
| Eduardo López Huesembe                       | 9  | 4525  | 88.2  | 16.8 | 0.399 |
| Eduardo López Huesembe                       | 9  | 1091  | 72.3  | 25.8 | 0.079 |
| Eduardo López Huesembe                       | 9  | 1169  | 91.0  | 11.5 | 0.106 |
| Roque Flores Tapuy                           | 9  | 83    | 92.8  | 11.2 | 0.008 |
| Elias Melendez Castro                        | 9  | 558   | 94.6  | 16.9 | 0.053 |
| Celso Robles Gutierrez                       | 9  | 137   | 78.3  | 23.2 | 0.011 |
| Lotty del Carmen Morey Amacifuen             | 10 | 38699 | 64.1  | 28.8 | 2.481 |
| Asociacion El Paraiso De Yurilamas           | 10 | 6968  | 93.3  | 31.6 | 0.650 |
| Conservacion Internaciona Rodal Tahuamanu    | 10 | 12875 | 95.1  | 10.0 | 1.225 |
| Picaflor Research Center Tambopata Eirl      | 10 | 1343  | 106.4 | 8.8  | 0.143 |
| Aprodes                                      | 10 | 1872  | 48.3  | 15.8 | 0.090 |
| Estacion Ecologica Turistica Amaru Mayo S.A. | 10 | 3602  | 66.6  | 24.9 | 0.239 |
| Wildlife Conservation Society (Wcs-Peru)     | 10 | 9941  | 81.7  | 19.6 | 0.812 |

|                                                    |    |        |       |      |        |
|----------------------------------------------------|----|--------|-------|------|--------|
| Universidad Alas Peruanas                          | 10 | 12591  | 54.0  | 29.2 | 0.680  |
| Antonio Fernandini Guerrero                        | 10 | 487    | 64.0  | 20.7 | 0.031  |
| Ccnn Queros                                        | 10 | 6984   | 58.1  | 16.1 | 0.406  |
| Carlos Enrique Berninzon                           | 10 | 7509   | 2.2   | 1.9  | 0.010  |
| Asociacion Civil Aves Del Peru                     | 10 | 515    | 8.0   | 2.1  | 0.004  |
| Cuenca Del Rio Huayabamba                          | 10 | 143829 | 20.6  | 22.5 | 2.965  |
| Asoc. para la Conservación de la Cuenca Amazonica* | 10 | 10154  | 107.9 | 11.5 | 1.095  |
| Asoc. para la Conservación de la Cuenca Amazonica* | 10 | 136402 | 105.7 | 13.0 | 14.416 |
| ONG Aicon                                          | 10 | 30139  | 74.1  | 32.4 | 2.232  |
| Lourdes Consuelo Fernandez Felipe-Morales          | 10 | 480    | 89.2  | 16.4 | 0.043  |
| Javier Manuel Salazar Carbajal                     | 10 | 224618 | 110.0 | 15.9 | 24.647 |
| Ong Naturaleza Y Cultura Internacional             | 10 | 7981   | 1.2   | 0.4  | 0.009  |
| Inversiones Manguare S.A.C                         | 11 | 128    | 110.1 | 10.7 | 0.014  |
| Ismael Cisneros Chunga (Lote A)                    | 11 | 34     | 0.6   | 0.1  | <0.001 |
| Ismael Cisneros Chunga (Lote B)                    | 11 | 41     | 1.3   | 0.2  | <0.001 |
| Jesus Ricardo Pissani Urdales                      | 11 | 31     | 4.6   | 0.3  | <0.001 |
| Proyecto Agua Negra                                | 11 | 285    | 58.1  | 23.3 | 0.017  |
| Gilberto Vela Cardenas                             | 11 | 989    | 89.9  | 22.7 | 0.089  |
| Tambopata Expeditions S.A                          | 11 | 4498   | 100.7 | 21.8 | 0.453  |
| Reserva Ecologica Taricay                          | 11 | 480    | 100.1 | 14.7 | 0.048  |
| Complejoturistico Ayaymam                          | 11 | 591    | 87.8  | 13.0 | 0.052  |
| Reserva Natural Lagartococha                       | 11 | 2545   | 76.9  | 30.7 | 0.196  |
| Mader Sur Oriental Sosten-Madesos                  | 11 | 3416   | 100.6 | 18.4 | 0.344  |
| Amtuset                                            | 11 | 393    | 110.3 | 9.2  | 0.043  |
| Inversiones Leniperu                               | 11 | 10     | 4.5   | 0.2  | <0.001 |
| Jungle Odyssey Peru Eirl                           | 11 | 1069   | 84.4  | 23.9 | 0.090  |
| Justiniano Zuñiga Guzman                           | 11 | 2081   | 73.8  | 23.0 | 0.154  |
| Ccnn Infierno                                      | 11 | 1664   | 89.4  | 24.2 | 0.149  |
| Amaitus                                            | 11 | 3793   | 66.3  | 35.4 | 0.252  |
| Zafre S.Ac.                                        | 11 | 9725   | 101.3 | 14.8 | 0.985  |
| Martin Alejo Condori Quispe                        | 11 | 2004   | 87.3  | 15.2 | 0.175  |
| Empresa Maveco Sand Tour                           | 11 | 1436   | 10.4  | 1.3  | 0.015  |
| Pantiacolla Tours Srltda                           | 11 | 680    | 87.5  | 25.8 | 0.059  |
| Inkaterra                                          | 11 | 7861   | 63.8  | 21.9 | 0.501  |
| Ecoamazonia Lodge Srl                              | 11 | 6316   | 77.5  | 29.9 | 0.490  |
| Juan Carlos Hidalgo Mendoza                        | 11 | 5347   | 76.4  | 18.4 | 0.409  |
| Abraham Aguirre Apaza                              | 11 | 1292   | 97.9  | 25.1 | 0.126  |
| Rainforest Expeditions Sac                         | 11 | 375    | 93.4  | 12.2 | 0.035  |
| Ecoturismo Amazonico Y Andino Del Peru             | 11 | 245    | 58.6  | 13.6 | 0.014  |
| Ecoturismo Perla Sac                               | 11 | 3200   | 45.4  | 10.7 | 0.145  |
| Jaime Perez Del Solar                              | 11 | 299    | 35.3  | 13.2 | 0.011  |

|                                                     |    |      |       |      |         |
|-----------------------------------------------------|----|------|-------|------|---------|
| Erasmus Sumalave                                    | 11 | 598  | 84.5  | 20.5 | 0.051   |
| Asociacion De Productores De Ranas Venenosas Progr. | 12 | 3859 | 58.6  | 29.5 | 0.226   |
| Perufish Aquarium Eirl                              | 12 | 729  | 113.0 | 10.9 | 0.082   |
| Eber Moises Quispe Albergrin                        | 13 | 580  | 41.3  | 10.2 | 0.024   |
| Transfacao                                          | 13 | 171  | 37.7  | 9.5  | 0.006   |
| Mario Puma Guillen                                  | 13 | 75   | 32.3  | 7.8  | 0.002   |
| Suilberto Arias Leon                                | 13 | 234  | 33.6  | 11.5 | 0.008   |
| Maria Isabel Cavero Macedo                          | 13 | 256  | 37.8  | 8.7  | 0.010   |
| Luis Alberto Yalico Castañeda                       | 13 | 33   | 37.9  | 15.4 | 0.001   |
| Esther Bachmann Keller                              | 13 | 833  | 37.8  | 10.9 | 0.031   |
| Edmundo Frey Martinez                               | 13 | 423  | 33.1  | 14.8 | 0.014   |
| Kurt Antonio Verde Taquir                           | 13 | 296  | 45.4  | 7.6  | 0.013   |
| Teodosia Melgarejo Ponce                            | 13 | 223  | 30.8  | 12.4 | 0.007   |
| Piero Italo Costa Dall Orso                         | 13 | 1033 | 38.4  | 9.7  | 0.040   |
| Rolando Edmundo Piskulich Johnson                   | 13 | 102  | 56.4  | 11.9 | 0.006   |
| Guillermo Lopez Barbachan                           | 13 | 72   | 58.4  | 12.7 | 0.004   |
| Santiago Osorio Ortiz                               | 13 | 284  | 41.3  | 9.5  | 0.012   |
| Jose Manuel Abadia Duarte                           | 13 | 20   | 32.7  | 13.9 | < 0.001 |
| Salbador Choque Quinto                              | 13 | 49   | 41.8  | 8.7  | 0.002   |
| Gregorio Garcia Ramirez                             | 13 | 20   | 49.2  | 11.9 | < 0.001 |
| Paulino Garcia Gomez                                | 13 | 14   | 43.8  | 10.8 | < 0.001 |
| Juana Herrera Luyo                                  | 13 | 16   | 49.5  | 7.2  | < 0.001 |
| Ana Lourdes Rios Egg                                | 13 | 12   | 52.5  | 5.2  | < 0.001 |
| Jorge Antonio Chuqui Castillejo                     | 13 | 50   | 39.8  | 8.6  | 0.002   |
| Carlos Frey Martinez                                | 13 | 206  | 38.9  | 12.0 | 0.008   |
| Samuel Beto Villar Soto                             | 13 | 93   | 34.9  | 17.9 | 0.003   |
| Nery Pardave Soto                                   | 13 | 195  | 40.9  | 7.2  | 0.008   |
| Felix Maximo Rivera Galarza                         | 13 | 258  | 36.4  | 6.6  | 0.009   |
| Juan Pomazongo Miranda                              | 13 | 330  | 38.0  | 5.6  | 0.013   |
| Felix Orbezo Adrian                                 | 13 | 23   | 40.6  | 8.3  | 0.001   |
| Nora Eugenia Ratto Garcia                           | 13 | 655  | 42.4  | 10.0 | 0.028   |
| Esio Mario Arbocco Joann                            | 13 | 676  | 47.0  | 9.4  | 0.032   |
| Ruth Arbocco De Venegas                             | 13 | 629  | 48.6  | 12.4 | 0.031   |
| Armando Quispe Santos                               | 13 | 564  | 39.6  | 8.0  | 0.022   |
| Eligio Albengrin Gallo                              | 13 | 1933 | 33.2  | 14.8 | 0.064   |
| Guillermo Guido Beingolea Vingerhoets               | 13 | 702  | 37.3  | 8.1  | 0.026   |
| Everardo Bao Richle                                 | 13 | 861  | 28.2  | 12.5 | 0.024   |
| Maria Jesus Galindo Arriola                         | 13 | 47   | 34.8  | 8.1  | 0.002   |
| Ana Karina Estrada Santamaria                       | 13 | 1389 | 1.2   | 0.3  | 0.002   |
| Eduardo Palma Lama                                  | 13 | 10   | 2.4   | 0.3  | < 0.001 |
| Jean Carlo Freundt Suarez                           | 13 | 1    | 3.4   | 0.0  | < 0.001 |
| Avelina Cumpa Chura                                 | 13 | < 1  | NA    | NA   | < 0.001 |

|                                     |    |      |       |      |         |
|-------------------------------------|----|------|-------|------|---------|
| Cecilio Alarcon Espinoza            | 13 | 8    | 8.0   | 3.5  | < 0.001 |
| Hector Jaime Jaime                  | 13 | 1    | 7.8   | 0.0  | < 0.001 |
| Asociacion de Junqueros de Playa Ci | 13 | 87   | 7.7   | 3.2  | < 0.001 |
| Isabel Blanca Vilchez Ninahuanca    | 13 | 1019 | 39.4  | 11.1 | 0.040   |
| Mercedes Guarnizo Coll de Pinedo    | 13 | 4620 | 40.0  | 14.7 | 0.185   |
| Nelly Peña Herrera                  | 13 | 1009 | 94.1  | 8.0  | 0.095   |
| Cornelio Olivares Uchupe            | 13 | 770  | 92.9  | 8.5  | 0.072   |
| Juana Quilca Lluscca                | 13 | 745  | 95.1  | 7.9  | 0.071   |
| Margarita Fortunata Garcia Gutierre | 13 | 901  | 92.1  | 7.5  | 0.083   |
| Hipolito Melo Achata                | 13 | 786  | 93.0  | 6.2  | 0.073   |
| Augusto Eli Moreno Trujillo         | 13 | 938  | 95.0  | 19.3 | 0.089   |
| Elba Tatiana Espinosa Quiñones      | 13 | 924  | 79.2  | 21.9 | 0.073   |
| Esteban Cansaya Quispe              | 13 | 350  | 83.0  | 9.9  | 0.029   |
| Efrain Santos Quispe Cjuno          | 13 | 353  | 83.7  | 11.1 | 0.030   |
| Beatriz Mio Villa                   | 13 | 361  | 88.9  | 11.9 | 0.032   |
| Antonieta Quispe Loaiza             | 13 | 352  | 91.1  | 12.6 | 0.032   |
| Alfonso Mulisaca Pacori             | 13 | 356  | 101.4 | 9.2  | 0.036   |
| Arturo Lazaro Chacon                | 13 | 350  | 106.9 | 3.3  | 0.037   |
| Alejandro Mendez Huanca             | 13 | 265  | 60.0  | 34.2 | 0.016   |
| Angel Damazo Salinas Tapia          | 13 | 265  | 61.1  | 32.5 | 0.016   |
| Alejandro Chillihuani Condori       | 13 | 261  | 58.0  | 32.7 | 0.015   |
| Edgar Barrios Zamata                | 13 | 266  | 83.6  | 17.6 | 0.022   |
| Juan Apaza Quispe                   | 13 | 261  | 85.3  | 15.8 | 0.022   |
| Jesús Cascamayta Pari               | 13 | 266  | 74.1  | 30.6 | 0.020   |
| Concepción Condori Leon             | 13 | 267  | 51.4  | 34.2 | 0.014   |
| Isaac Contreras Pinares             | 13 | 149  | 73.5  | 24.0 | 0.011   |
| Hilario Sevillano Santa Cruz        | 13 | 205  | 76.2  | 21.7 | 0.016   |
| Jorge Minga Huayto                  | 13 | 199  | 74.6  | 25.1 | 0.015   |
| Celso Villavicencio Fernandez       | 13 | 199  | 69.5  | 24.3 | 0.014   |
| Jorge Lopez Molina                  | 13 | 210  | 65.9  | 25.3 | 0.014   |
| Edmundo Vasquez Pinto               | 13 | 395  | 79.8  | 18.0 | 0.032   |
| Edmundo Vasquez Vicente             | 13 | 396  | 81.8  | 16.4 | 0.032   |
| Billy Javier Zea Gavilan            | 13 | 388  | 81.7  | 15.8 | 0.032   |
| German Mario Fernández Hanco        | 13 | 396  | 80.9  | 16.4 | 0.032   |
| Alberto Zúñiga Llanllay             | 13 | 187  | 80.8  | 30.2 | 0.015   |
| Felipe Martín Luque Quispe          | 13 | 180  | 83.3  | 26.8 | 0.015   |
| Benito Mendoza Bastidas             | 13 | 177  | 69.6  | 29.3 | 0.012   |
| Humberto Vargas Fernández           | 13 | 186  | 67.9  | 27.3 | 0.013   |
| Jesús Luque Llanllay                | 13 | 173  | 60.3  | 25.7 | 0.010   |
| Juan Carlos Lara Rivas              | 13 | 186  | 77.3  | 17.7 | 0.014   |
| Celestino Nicolás Lara Salon        | 13 | 190  | 74.4  | 21.3 | 0.014   |
| Benito Huayllasi Valdivia           | 13 | 170  | 79.5  | 17.8 | 0.014   |
| Alexander Huaña Tuya                | 13 | 181  | 78.4  | 23.1 | 0.014   |



|                                      |    |      |       |      |       |
|--------------------------------------|----|------|-------|------|-------|
| Josefina Huaman Huillca              | 13 | 189  | 80.9  | 22.1 | 0.015 |
| Alicia Vargas Llanllay               | 13 | 181  | 82.0  | 21.9 | 0.015 |
| Gladys Georgina Llicahua Paccosoncco | 13 | 419  | 71.0  | 22.0 | 0.030 |
| Hilaria Ricarde Diaz                 | 13 | 402  | 79.8  | 15.9 | 0.032 |
| Asunción Fernández Champi            | 13 | 382  | 79.5  | 16.6 | 0.030 |
| Augusta Paccosoncco Hualla           | 13 | 376  | 68.3  | 23.0 | 0.026 |
| Juan Saravia Flores                  | 13 | 76   | 97.7  | 10.6 | 0.007 |
| Eulogio Capquique Vargas             | 13 | 208  | 85.1  | 16.0 | 0.018 |
| Adriel Ttito Mamani                  | 13 | 385  | 71.8  | 21.6 | 0.028 |
| Abraham Pomari Lopez                 | 13 | 1589 | 103.3 | 13.9 | 0.164 |
| Orlando Campos Collantes             | 13 | 1012 | 112.6 | 12.3 | 0.114 |
| Raúl Palomino Rojas                  | 13 | 178  | 102.1 | 6.3  | 0.018 |
| Roger Grimaldo Moscoso Mamani        | 13 | 348  | 84.5  | 11.5 | 0.029 |
| Rufino Quispe Chicasaca              | 13 | 351  | 86.1  | 15.2 | 0.030 |
| Leandro Quispe Mamani                | 13 | 361  | 87.5  | 13.3 | 0.032 |
| Oswaldo Quispe Ramos                 | 13 | 353  | 88.0  | 12.8 | 0.031 |
| Luis Aguilar Loayza                  | 13 | 363  | 93.6  | 12.8 | 0.034 |
| Rosaura Quispe Ramos                 | 13 | 359  | 105.3 | 5.5  | 0.038 |
| Mauro Cansaya Aranibal               | 13 | 343  | 104.0 | 5.9  | 0.036 |
| Raymundo Aguilar Simaraura           | 13 | 263  | 57.7  | 34.2 | 0.015 |
| Juan Vara Surco                      | 13 | 260  | 86.2  | 10.0 | 0.022 |
| Nicomedes Quispe Puma                | 13 | 265  | 59.5  | 35.1 | 0.016 |
| Ricardina Pillco De Nina             | 13 | 262  | 86.3  | 14.0 | 0.023 |
| Valentina Llocle Saire               | 13 | 269  | 81.5  | 20.2 | 0.022 |
| Juana Quecaño Quispe                 | 13 | 264  | 62.9  | 35.9 | 0.017 |
| Teresa Chillihuani Layme             | 13 | 264  | 59.4  | 35.2 | 0.016 |
| Mamerto Holgado Huilca               | 13 | 265  | 60.0  | 32.6 | 0.016 |
| Luz Elizet Lopez Zurita              | 13 | 265  | 54.6  | 34.3 | 0.014 |
| Mauricio Flores Huayta               | 13 | 267  | 53.4  | 32.5 | 0.014 |
| Juan Carmen Palomino Ustua           | 13 | 203  | 83.9  | 17.2 | 0.017 |
| Vicente Emiliano Cutire Pari         | 13 | 207  | 67.8  | 27.2 | 0.014 |
| Victor Huaman Ccama                  | 13 | 146  | 78.5  | 20.3 | 0.011 |
| Sixto Luis Fernandez Barrientos      | 13 | 383  | 82.7  | 17.1 | 0.032 |
| Saul Salvador Zea Gavilan            | 13 | 388  | 81.4  | 14.9 | 0.032 |
| Leoncio David Mendoza Ticona         | 13 | 400  | 84.6  | 12.5 | 0.034 |
| Pascual Mendoza Huarache             | 13 | 402  | 86.6  | 10.3 | 0.035 |
| Juan Julio Fernandez Hanco           | 13 | 396  | 85.2  | 12.4 | 0.034 |
| Luis Reynaldo Rodríguez Fernandez    | 13 | 385  | 80.5  | 18.4 | 0.031 |
| Juan Pablo Gordillo Arias            | 13 | 189  | 89.4  | 24.8 | 0.017 |
| Juvenal Chirinos Cusihuaman          | 13 | 182  | 79.9  | 27.8 | 0.015 |
| Matilde Cadenas Quispe               | 13 | 180  | 78.9  | 31.3 | 0.014 |
| Julián Paucar Gómez                  | 13 | 185  | 74.3  | 24.4 | 0.014 |
| Rosa Hermelinda Huaña Tuya           | 13 | 177  | 71.8  | 28.4 | 0.013 |

|                                   |    |      |       |      |       |
|-----------------------------------|----|------|-------|------|-------|
| Vicente Mamani Mendoza            | 13 | 185  | 64.0  | 31.7 | 0.012 |
| Mercedes Merma Guzman             | 13 | 190  | 63.2  | 23.8 | 0.012 |
| Santos Dionisio Chirinos Zavala   | 13 | 190  | 71.1  | 21.3 | 0.014 |
| Luis Ocsa Tacuri                  | 13 | 174  | 80.4  | 20.2 | 0.014 |
| Lucien Clare Quillahuaman Romero  | 13 | 161  | 61.7  | 27.2 | 0.010 |
| Rufino Quispe Navarro             | 13 | 164  | 60.5  | 28.0 | 0.010 |
| Camilo Lelis Enrique Supo Picha   | 13 | 154  | 60.4  | 29.3 | 0.009 |
| Miguel Angel Ahuanari Manuyama    | 13 | 168  | 67.0  | 27.1 | 0.011 |
| Henry Edmundo Gil Peña            | 13 | 156  | 60.2  | 29.5 | 0.009 |
| Pablo Fernández Suaquita          | 13 | 437  | 82.2  | 13.6 | 0.036 |
| Weaver Wilson Cari Mogrovejo      | 13 | 3051 | 109.5 | 13.0 | 0.334 |
| Marlene Huillca Sutta             | 13 | 383  | 103.9 | 11.1 | 0.040 |
| Alejandro Villanueva Mamani       | 13 | 189  | 52.8  | 29.6 | 0.010 |
| Ricardo Quispe Puma               | 13 | 189  | 53.9  | 29.7 | 0.010 |
| Lurdes Quispe Tueros              | 13 | 154  | 66.5  | 26.3 | 0.010 |
| Jose Adrian Moscoso Delgado       | 13 | 192  | 58.2  | 31.6 | 0.011 |
| Nestor Fuentes León               | 13 | 435  | 96.2  | 14.7 | 0.042 |
| Jesusa Puma De Huamaní            | 13 | 447  | 87.0  | 17.0 | 0.039 |
| Jenny Lexi Izquierdo Reategui     | 13 | 186  | 55.9  | 30.2 | 0.010 |
| Hilario Chura Quispe              | 13 | 174  | 53.4  | 28.9 | 0.009 |
| Jacinta Mollo Ticona              | 13 | 155  | 65.3  | 29.9 | 0.010 |
| Gladys Roxana Fernández Guerreros | 13 | 151  | 61.0  | 32.6 | 0.009 |
| Gildo Quispe Gomez                | 13 | 160  | 62.4  | 27.7 | 0.010 |
| Jimmy Ponce De Leon Andagua       | 13 | 70   | 57.3  | 25.7 | 0.004 |
| Donato Yapura Huillca             | 13 | 185  | 55.4  | 28.3 | 0.010 |
| Ciriaco Benito Mollo Ticona       | 13 | 150  | 61.5  | 31.9 | 0.009 |
| Cuber Luis Sullca                 | 13 | 1010 | 94.6  | 24.4 | 0.096 |
| Mishari Rolando García Roca       | 13 | 912  | 91.2  | 17.8 | 0.083 |
| Oscar Quispe Sotomayor            | 13 | 148  | 63.8  | 27.6 | 0.009 |
| Elizabeth Tuero Carbajal          | 13 | 164  | 67.1  | 17.0 | 0.011 |
| Celestina Navarro Huamani         | 13 | 134  | 86.2  | 10.4 | 0.012 |
| Segundo Torres Sanchez            | 13 | 1250 | 114.1 | 10.0 | 0.143 |
| Saulo Vasquez Irigoin             | 13 | 1075 | 112.8 | 10.9 | 0.121 |
| Rosendo Horacio Vita Benito       | 13 | 100  | 101.7 | 13.6 | 0.010 |
| Reynel Alfonso Rivas Corrales     | 13 | 107  | 105.9 | 8.8  | 0.011 |
| Juvenal Moisés Rivas Corales      | 13 | 106  | 83.1  | 28.0 | 0.009 |
| Juan Carlos Céspedes Flores       | 13 | 105  | 102.6 | 9.2  | 0.011 |
| German Enrique Rivas Corrales     | 13 | 105  | 102.9 | 8.2  | 0.011 |
| Elard Edison Rocha Huayllani      | 13 | 104  | 78.0  | 23.9 | 0.008 |
| Froilan Quispe Mamani             | 13 | 109  | 106.8 | 9.4  | 0.012 |
| Dalmecio Champi Cabrera           | 13 | 101  | 106.4 | 8.3  | 0.011 |
| Ciriaco Ronal Flores Escalante    | 13 | 151  | 63.5  | 24.4 | 0.010 |
| Rolando Gil Peña                  | 13 | 165  | 64.7  | 26.6 | 0.011 |

|                                     |    |      |       |      |       |
|-------------------------------------|----|------|-------|------|-------|
| Pablo Quispe Mátame                 | 13 | 263  | 84.8  | 13.2 | 0.022 |
| Juan Carlos Velásquez Molero        | 13 | 107  | 101.7 | 12.1 | 0.011 |
| Willian Céspedes Huamani            | 13 | 108  | 104.9 | 9.8  | 0.011 |
| Jaime Velásquez Molero              | 13 | 114  | 102.5 | 8.9  | 0.012 |
| Emilio Huaman Apaza                 | 13 | 110  | 103.3 | 7.3  | 0.011 |
| Ebaristo Condori Machaca            | 13 | 114  | 106.9 | 5.8  | 0.012 |
| Violeta Rivas Corrales              | 13 | 100  | 106.2 | 8.5  | 0.011 |
| Teodoro Pantia Huaman               | 13 | 72   | 66.8  | 23.3 | 0.005 |
| Victor Rojas Sabino                 | 13 | 76   | 69.9  | 29.4 | 0.005 |
| Gladys Sussy Shamaire Murayari      | 13 | 68   | 88.2  | 28.2 | 0.006 |
| Roxana Mendoza Huaman               | 13 | 75   | 74.6  | 28.7 | 0.006 |
| Yolanda Mendoza Huaman              | 13 | 80   | 96.6  | 25.4 | 0.008 |
| Vicente Pacheco Flores              | 13 | 71   | 101.1 | 21.2 | 0.007 |
| Miguel Chambi Ccallomamani          | 13 | 75   | 103.4 | 20.2 | 0.008 |
| Evarista Huayllasi Valdivia         | 13 | 66   | 98.2  | 29.6 | 0.006 |
| Esteban Vargas Tejada               | 13 | 78   | 85.7  | 23.3 | 0.007 |
| Ernesto Huaman Flores               | 13 | 74   | 108.0 | 7.7  | 0.008 |
| Ronal Rado Quispe                   | 13 | 71   | 95.8  | 20.3 | 0.007 |
| Eloy Orestes Chambi Chura           | 13 | 86   | 65.6  | 20.3 | 0.006 |
| Asociacion De Comerciantes-Agrofocm | 13 | 221  | 99.9  | 18.1 | 0.022 |
| Asociacion De Comerciantes-Agrofocm | 13 | 3176 | 71.6  | 30.4 | 0.228 |
| Juan Perez Sanchez                  | 13 | 281  | 106.6 | 11.2 | 0.030 |
| Ciro Alagon Huamani                 | 13 | 790  | 106.2 | 13.2 | 0.084 |
| Alfredo Vrako Neuenschwander        | 13 | 2563 | 97.8  | 14.3 | 0.251 |
| Julio Zea Valdivia                  | 13 | 848  | 51.5  | 42.7 | 0.044 |
| Juan Velasquez Cabrera              | 13 | 827  | 84.1  | 8.1  | 0.070 |
| Guido Jesus Llicahua Pacosonco      | 13 | 781  | 88.5  | 15.0 | 0.069 |
| Julio Gil Moscoso                   | 13 | 1113 | 88.9  | 6.3  | 0.099 |
| Serafin Moscoso Mamani              | 13 | 1008 | 74.5  | 40.0 | 0.075 |
| Mario Alagon Huamani                | 13 | 407  | 97.0  | 26.0 | 0.039 |
| Jesus Valverde Vargas               | 13 | 753  | 100.1 | 10.1 | 0.075 |
| Francisca Sicos Vda De Cespedes     | 13 | 879  | 88.9  | 7.8  | 0.078 |
| Fernando Mamani Cutipa              | 13 | 900  | 88.0  | 6.0  | 0.079 |
| Alfredo Asto                        | 13 | 871  | 102.0 | 6.8  | 0.089 |
| Pedro Puma Champi                   | 13 | 796  | 83.2  | 6.6  | 0.066 |
| Domingo Llicahua Pecca              | 13 | 878  | 84.8  | 32.0 | 0.074 |
| Cirilo Huaynapata Montesinos        | 13 | 862  | 79.5  | 32.2 | 0.069 |
| Hugo Champiu Quispe                 | 13 | 606  | 86.0  | 13.7 | 0.052 |
| Ladislao Cespedes Sicus             | 13 | 663  | 95.1  | 7.7  | 0.063 |
| Esteban Huamani Cayllahua           | 13 | 526  | 85.8  | 9.8  | 0.045 |
| Valentin Quillahuaman Inquiltupa    | 13 | 900  | 86.2  | 7.0  | 0.078 |
| Villanueva Rojas Martinez           | 13 | 957  | 92.4  | 9.1  | 0.088 |
| Guido Lipa Gil                      | 13 | 915  | 105.9 | 10.6 | 0.097 |

|                                       |    |      |       |      |       |
|---------------------------------------|----|------|-------|------|-------|
| Susono Ninantay                       | 13 | 984  | 96.5  | 8.3  | 0.095 |
| Hilda Champi Ocampo                   | 13 | 818  | 109.4 | 4.1  | 0.090 |
| Areas para la Asociacion-Area N    02 | 13 | 973  | 104.5 | 5.2  | 0.102 |
| Candelaria Maldonado Cuadros          | 13 | 1004 | 96.9  | 13.6 | 0.097 |
| Parcelas en Evaluacion de la Asocia   | 13 | 1966 | 75.1  | 42.9 | 0.148 |
| Andres Huayllani Llerena              | 13 | 793  | 94.9  | 9.6  | 0.075 |
| Alejandro Guillen Amao                | 13 | 1147 | 106.4 | 7.7  | 0.122 |
| Carlos Barra Caller                   | 13 | 791  | 107.6 | 7.1  | 0.085 |
| Areas para la Asociacion-Area N    01 | 13 | 1187 | 51.2  | 47.6 | 0.061 |
| Guido Molina Valdez                   | 13 | 908  | 104.1 | 10.1 | 0.095 |
| Simeon Ernesto Centeno Castro         | 13 | 695  | 104.4 | 6.2  | 0.073 |
| Grimaldo Augusto Inca Vilca           | 13 | 750  | 97.7  | 8.0  | 0.073 |
| Daniel Condori Huayhua                | 13 | 769  | 94.5  | 6.7  | 0.073 |
| Maribel Medina Valencia               | 13 | 753  | 98.7  | 7.3  | 0.074 |
| Justina Arcos Pajuelo                 | 13 | 968  | 100.3 | 6.9  | 0.097 |
| Wilver Dionisio Quispe Guzman         | 13 | 907  | 101.8 | 7.5  | 0.092 |
| Antonio Rodriguez Diaz                | 13 | 906  | 102.1 | 8.2  | 0.092 |
| Marcial Reymundo Tellez Heredia       | 13 | 201  | 89.1  | 13.5 | 0.018 |
| Emilio Sancama Chavez                 | 13 | 209  | 84.2  | 14.9 | 0.018 |
| Francisco Solano Ponce De Leon Merc   | 13 | 868  | 103.7 | 7.3  | 0.090 |
| Eustaquio Eduardo Ccansaya Quispe     | 13 | 472  | 105.6 | 7.9  | 0.050 |
| Juana Cahuana Huanaco                 | 13 | 703  | 101.1 | 12.6 | 0.071 |
| Candida Rodriguez Diaz                | 13 | 1005 | 106.4 | 8.4  | 0.107 |
| Rebeca Mariela Chucuya Alfaro         | 13 | 969  | 102.2 | 8.9  | 0.099 |
| Lucia Ttito Quispe                    | 13 | 950  | 104.5 | 8.2  | 0.099 |
| Ubalдина Vargas Aroni                 | 13 | 814  | 101.9 | 8.8  | 0.083 |
| Miguel Grimaldo Moscoso Delgado       | 13 | 603  | 104.3 | 8.2  | 0.063 |
| Rosendo Antonio Castillo Cahuana      | 13 | 758  | 99.2  | 8.2  | 0.075 |
| Antonio Apaza Choqueluque             | 13 | 761  | 98.3  | 6.5  | 0.075 |
| Juliana Quispe Vda De Champi          | 13 | 710  | 90.5  | 6.9  | 0.064 |
| Jardy Hugo Nina Iquiapaza             | 13 | 158  | 97.3  | 7.8  | 0.015 |
| Valentina Lopez Nina                  | 13 | 190  | 87.8  | 17.0 | 0.017 |
| Emilio Palomino Ccoa                  | 13 | 152  | 92.7  | 8.8  | 0.014 |
| Raymundo Huaynasi Lopez               | 13 | 391  | 104.2 | 9.0  | 0.041 |
| Gladys Guerrero Rumaldo               | 13 | 777  | 104.4 | 8.6  | 0.081 |
| Onofre Basilebez Guerreros Rumaldo    | 13 | 737  | 100.0 | 9.3  | 0.074 |
| Mamerto Rodriguez Huaman              | 13 | 584  | 100.9 | 10.2 | 0.059 |
| Carmen Rosa Diaz Hanco                | 13 | 720  | 98.7  | 11.9 | 0.071 |
| Domingo Jose Fernandez Urdanivia      | 13 | 701  | 99.4  | 7.3  | 0.070 |
| Daniel Andia Monzon                   | 13 | 506  | 96.6  | 9.4  | 0.049 |
| Basilio Yana Vaga                     | 13 | 460  | 99.3  | 8.4  | 0.046 |
| Vicente Escobar Huarcaya              | 13 | 123  | 104.8 | 6.9  | 0.013 |
| Agripina Nicolasa Andia Espinosa      | 13 | 121  | 99.3  | 8.3  | 0.012 |

|                                   |    |      |       |      |         |
|-----------------------------------|----|------|-------|------|---------|
| Monica Gonzales Rodriguez         | 13 | 121  | 100.4 | 10.8 | 0.012   |
| Alejandrina Condori Vargas        | 13 | 78   | 104.0 | 6.2  | 0.008   |
| Liz Mayra Quispe Rodriguez        | 13 | 568  | 105.1 | 7.7  | 0.060   |
| Juana Fernandez Champi            | 13 | 658  | 103.2 | 11.6 | 0.068   |
| Roman Ttito Quispe                | 13 | 688  | 98.9  | 8.1  | 0.068   |
| Prudencia Tuero Soel              | 13 | 990  | 102.7 | 10.0 | 0.102   |
| Adriel Champi Quispe              | 13 | 706  | 90.0  | 14.8 | 0.064   |
| Odilon Sinti Condori              | 13 | 797  | 84.4  | 8.6  | 0.067   |
| Ana Lucia Hurtado Abad            | 13 | 101  | 99.3  | 4.5  | 0.010   |
| Haydee Giovana Alarcon Pillco     | 13 | 88   | 94.7  | 13.2 | 0.008   |
| Wilbert Villegas Alvarez          | 13 | 105  | 97.2  | 5.0  | 0.010   |
| Gregoria Castro Chalco            | 13 | 88   | 91.7  | 9.5  | 0.008   |
| Miguel Angel Puclla Gutierrez     | 13 | 103  | 85.4  | 15.5 | 0.009   |
| Pedro Huaman Apaza                | 13 | 96   | 88.4  | 11.0 | 0.008   |
| Elmer Velasquez Valdivieso        | 13 | 91   | 89.8  | 12.2 | 0.008   |
| Carlos Mendoza Huaman             | 13 | 88   | 89.5  | 9.7  | 0.008   |
| Pastora Condori Torres            | 13 | 96   | 90.3  | 5.8  | 0.009   |
| Escolastico Zely Paye Condori     | 13 | 95   | 89.3  | 5.4  | 0.008   |
| Vicente Flore Cruz                | 13 | 94   | 90.3  | 6.5  | 0.008   |
| Alfredo Palomino Lopez            | 13 | 91   | 99.4  | 7.2  | 0.009   |
| Celestono Mendoza Llanos          | 13 | 96   | 104.3 | 5.3  | 0.010   |
| Jose Luis Lara Rivas              | 13 | 90   | 102.8 | 8.4  | 0.009   |
| Edwin Donato Cayo Yapura          | 13 | 90   | 99.6  | 9.8  | 0.009   |
| Celso Ortiz Maqque                | 13 | 260  | 103.1 | 11.9 | 0.027   |
| Lucio Velasques Ttito             | 13 | 762  | 102.3 | 8.6  | 0.078   |
| Aurelio Yana Taipe                | 13 | 339  | 104.3 | 8.6  | 0.035   |
| Tadeo Quispe Gomez                | 13 | 707  | 104.2 | 10.9 | 0.074   |
| Fortunato Adrian Centeno Checalla | 13 | 415  | 102.0 | 17.8 | 0.042   |
| Lius Clodoveo Perez Sanchez       | 13 | 511  | 110.4 | 5.5  | 0.056   |
| Josefina Yeny Lipa Gil            | 13 | 1187 | 106.2 | 10.4 | 0.126   |
| Saturdino Demetrio Pacheco Estaca | 13 | 838  | 110.1 | 5.2  | 0.092   |
| Javier Palomino Rojas             | 13 | 912  | 108.1 | 8.7  | 0.099   |
| Jesus Camacho Acasaba             | 13 | 505  | 99.2  | 8.9  | 0.050   |
| Antonio Jaime Lopez Nieto         | 13 | 3297 | 44.5  | 21.1 | 0.147   |
| Remberto Reategui Paredes         | 13 | 5    | 58.4  | 4.0  | < 0.001 |
| Mercedes Villarreal De Galindo    | 13 | 5    | 6.8   | 0.9  | < 0.001 |
| Felix Cesar Calderon Urtecho      | 13 | 4    | 6.1   | 1.2  | < 0.001 |
| Antonio Fernandini Guerrero       | 13 | 1711 | 90.2  | 21.5 | 0.154   |
| Maximo Julio Ventura Monasterio   | 14 | 307  | 115.0 | 15.1 | 0.035   |
| Maximo Cahuana Rivera             | 14 | 720  | 112.0 | 17.6 | 0.081   |
| Juan Saavedra Meza                | 14 | 1272 | 112.7 | 15.5 | 0.143   |
| Antonio Valdez Simons             | 14 | 629  | 103.5 | 27.0 | 0.065   |
| Manuel Vargas Cucho               | 14 | 2762 | 107.1 | 19.6 | 0.296   |

|                                  |    |      |       |      |       |
|----------------------------------|----|------|-------|------|-------|
| Miguel Farfan Gomez              | 14 | 2475 | 101.1 | 23.1 | 0.250 |
| Guillermo Chota Leon             | 14 | 655  | 90.2  | 34.4 | 0.059 |
| Maria Jesus Grandiller Olivera   | 14 | 98   | 112.9 | 16.1 | 0.011 |
| Armando Valdes Simons            | 14 | 1137 | 119.6 | 11.2 | 0.136 |
| Marcelino Sayago Ortega          | 14 | 312  | 116.8 | 10.5 | 0.036 |
| Julio Chambi Cahuana             | 14 | 735  | 103.7 | 12.2 | 0.076 |
| Juan Gualberto Chota Leon        | 14 | 61   | 118.8 | 3.7  | 0.007 |
| Ursula Ursina Pizango Navi       | 14 | 1977 | 103.8 | 8.8  | 0.205 |
| Neri Alcida Diaz De Agapito      | 14 | 232  | 97.1  | 21.4 | 0.023 |
| Angel Augusto Cespedes Tapia     | 14 | 691  | 117.4 | 9.8  | 0.081 |
| Ismael Solorzano Huanuire        | 14 | 416  | 111.3 | 12.7 | 0.046 |
| Alberto Alfredo Palla Panduro    | 14 | 950  | 118.1 | 12.4 | 0.112 |
| Sixto Carazas Quispe             | 14 | 1053 | 117.8 | 16.7 | 0.124 |
| Victor Eusebio Diaz Moreno       | 14 | 719  | 117.9 | 11.6 | 0.085 |
| Nelson Arnaldo Morey Silva       | 14 | 795  | 118.4 | 9.5  | 0.094 |
| Justino Collante Guzman          | 14 | 173  | 76.9  | 43.1 | 0.013 |
| Eduardo Palomino Melo            | 14 | 399  | 117.1 | 9.9  | 0.046 |
| Victor Macochoa Machoa           | 14 | 301  | 119.3 | 11.2 | 0.036 |
| Zenobio Grandiller Olivera       | 14 | 263  | 119.2 | 18.7 | 0.031 |
| Pedro Marchena Mendieta          | 14 | 204  | 101.3 | 32.8 | 0.021 |
| Encarnación Mamani Larico        | 14 | 1120 | 118.6 | 13.9 | 0.133 |
| Justino Palla Dea                | 14 | 1139 | 105.9 | 16.7 | 0.121 |
| Felicitas Troncoso Huayta        | 14 | 798  | 114.4 | 16.3 | 0.091 |
| Nemesio Mamani Machacca          | 14 | 1044 | 118.2 | 14.9 | 0.123 |
| Adolfina Yalta Gonzales          | 14 | 137  | 113.5 | 20.1 | 0.016 |
| Braulio Valencia Valencia        | 14 | 1054 | 120.5 | 8.0  | 0.127 |
| Julia Saca Alvarez               | 14 | 999  | 122.2 | 11.9 | 0.122 |
| Francisco Tapia Mamani           | 14 | 1358 | 108.7 | 26.4 | 0.148 |
| Santiago Castellanos Laynes      | 14 | 2010 | 111.0 | 13.1 | 0.223 |
| Santiago Taipe Chuima            | 14 | 763  | 112.4 | 9.8  | 0.086 |
| Guillermo Calderon Ramirez       | 14 | 1050 | 114.8 | 11.8 | 0.121 |
| Diguer Mario Villafuerte Cornejo | 14 | 998  | 109.0 | 8.0  | 0.109 |
| Adis Aurora Villafuerte Cornejo  | 14 | 688  | 107.8 | 9.6  | 0.074 |
| Inmer Camargo Chavez             | 14 | 938  | 88.1  | 19.2 | 0.083 |
| Francisco Quispe Chani           | 14 | 2012 | 107.8 | 9.4  | 0.217 |
| Jeronimo Emiliano Taipe Chuima   | 14 | 652  | 112.3 | 10.7 | 0.073 |
| Mohasi Vasquez Rolin             | 14 | 991  | 116.0 | 8.5  | 0.115 |
| Alicia Fatima Noa Grifa          | 14 | 1211 | 108.1 | 14.9 | 0.131 |
| Carlos Antonio Valdivia Sanchez  | 14 | 564  | 112.5 | 8.1  | 0.063 |
| Emilio Macochoa Noa              | 14 | 918  | 113.4 | 10.7 | 0.104 |
| Armando Mejia Lopez              | 14 | 789  | 105.1 | 18.5 | 0.083 |
| Enrique Tije Arasaire            | 14 | 560  | 123.9 | 7.8  | 0.069 |
| Rosa Tapia De Ramirez            | 14 | 262  | 110.9 | 14.4 | 0.029 |

|                                      |    |      |       |      |       |
|--------------------------------------|----|------|-------|------|-------|
| Fidel Yupanqui Dueñas                | 14 | 593  | 120.2 | 11.8 | 0.071 |
| Pedro Quispe Kana                    | 14 | 1261 | 114.3 | 13.0 | 0.144 |
| Julio Alejandro Espinoza Loayza      | 14 | 1592 | 101.1 | 27.6 | 0.161 |
| Claudio Augusto Tacoma Pontisil      | 14 | 716  | 111.8 | 18.5 | 0.080 |
| Martin Laura Herrera                 | 14 | 758  | 111.5 | 21.7 | 0.085 |
| Dario Ccoica Medoza                  | 14 | 1389 | 116.4 | 13.1 | 0.162 |
| Dolly Magdalena Simplicio Arias      | 14 | 1049 | 99.9  | 16.3 | 0.105 |
| Celinda Gonzales Carrillo            | 14 | 213  | 123.6 | 4.9  | 0.026 |
| Cancio Huaman Hurtado                | 14 | 632  | 113.6 | 17.7 | 0.072 |
| Jacinto Parillo Quispe               | 14 | 534  | 111.9 | 12.1 | 0.060 |
| Alberto Garcia Rojas                 | 14 | 293  | 121.6 | 13.5 | 0.036 |
| Blanca Victoria Sahuarico De Aradivi | 14 | 268  | 111.2 | 27.1 | 0.030 |
| Ernesto Mendoza Huancacuri           | 14 | 1676 | 101.2 | 25.5 | 0.170 |
| Amancio Dimas Ibañez Tapuy           | 14 | 400  | 117.5 | 8.7  | 0.047 |
| Macario Dionicio Cuadros Quispe      | 14 | 609  | 115.4 | 13.8 | 0.070 |
| Jose de la Cruz Carrasco             | 14 | 646  | 110.0 | 23.0 | 0.071 |
| Luz Marina Grandiller Olivera        | 14 | 88   | 124.3 | 3.7  | 0.011 |
| Maria Adela Moreno Tapuy             | 14 | 205  | 97.1  | 12.0 | 0.020 |
| Vidal Diaz Vargas                    | 14 | 520  | 112.3 | 16.1 | 0.058 |
| Manuel Auquipata Santa Cruz          | 14 | 123  | 110.0 | 18.2 | 0.014 |
| Yordi Ronald Arimuya Rodriguez       | 14 | 679  | 118.8 | 10.7 | 0.081 |
| Rodolfo Herrera Inuma                | 14 | 497  | 110.2 | 27.1 | 0.055 |
| Laura Palla Panduro                  | 14 | 635  | 112.4 | 14.1 | 0.071 |
| Clemente Ccolque Champi              | 14 | 746  | 118.7 | 12.9 | 0.089 |
| Juan Sanchez Montes                  | 14 | 62   | 80.5  | 39.2 | 0.005 |
| Juan Crisostomo Prada Bravo          | 14 | 231  | 103.2 | 27.3 | 0.023 |
| Gregorio Torres Melendez             | 14 | 400  | 109.8 | 30.5 | 0.044 |
| Franklin Torres Caller               | 14 | 213  | 122.1 | 4.5  | 0.025 |
| Favio Celestino Palacios Mejia       | 14 | 707  | 114.4 | 17.4 | 0.081 |
| Adelma Alicia Palla Dea              | 14 | 660  | 120.6 | 10.9 | 0.080 |
| Aurelio Garcia Caceres               | 14 | 561  | 121.2 | 3.2  | 0.068 |
| Rigoberto Paredes Martinez           | 14 | 474  | 109.2 | 10.3 | 0.052 |
| Alejandrina Huesembe De Marchena     | 14 | 554  | 114.2 | 13.4 | 0.063 |
| Mariano Cahuantico Huaman            | 14 | 237  | 113.5 | 23.8 | 0.027 |
| Sergio Flores Lloza                  | 14 | 531  | 118.7 | 11.6 | 0.063 |
| Mirian Marice Herbozo Reategui       | 14 | 1854 | 107.4 | 19.7 | 0.199 |
| Gregoria Cahuantico Lizaraso         | 14 | 662  | 120.2 | 11.8 | 0.080 |
| Mauro Flores Trigoso                 | 14 | 1365 | 104.0 | 12.5 | 0.142 |
| Luis Enrique del Aguila Sinuire      | 14 | 1911 | 105.4 | 11.3 | 0.201 |
| Jorge Choquehuanca Mamani            | 14 | 1182 | 112.0 | 10.6 | 0.132 |
| Wilfredo Condori Obando              | 14 | 831  | 109.7 | 12.3 | 0.091 |
| Julio Ramirez Montes                 | 14 | 511  | 112.8 | 19.9 | 0.058 |
| Wilfredo De La Peña Gonzales         | 14 | 1020 | 116.0 | 13.9 | 0.118 |

|                                    |    |      |       |      |       |
|------------------------------------|----|------|-------|------|-------|
| David Rodriguez Grifa              | 14 | 955  | 110.9 | 20.6 | 0.106 |
| Regina Palla De Calle              | 14 | 645  | 107.5 | 23.2 | 0.069 |
| Cesar Macochoa Noa                 | 14 | 666  | 113.8 | 11.1 | 0.076 |
| Nicanor Vasquez Huisa              | 14 | 378  | 118.2 | 10.5 | 0.045 |
| Ignacio Macochoa Noa               | 14 | 606  | 106.6 | 23.3 | 0.065 |
| David Rodriguez Tenoy              | 14 | 942  | 113.4 | 14.1 | 0.107 |
| Eduardo Macochoa Noa               | 14 | 237  | 121.7 | 9.2  | 0.029 |
| Mariano Barbaro Jacinto Irco       | 14 | 1193 | 111.1 | 25.5 | 0.133 |
| Melchor Huaracha Yauri             | 14 | 727  | 111.6 | 9.5  | 0.081 |
| Suplicio Herrera Anayanqui         | 14 | 247  | 88.8  | 33.2 | 0.022 |
| Cipriano Tito Quispe               | 14 | 927  | 117.8 | 14.5 | 0.109 |
| Vilma Sueros Ramirez               | 14 | 434  | 92.1  | 32.4 | 0.040 |
| Alfredo Zambrano Tapia             | 14 | 513  | 116.6 | 13.6 | 0.060 |
| Oscar Sahuarico Begazo             | 14 | 1366 | 99.5  | 35.8 | 0.136 |
| Cesar Delgado Andia                | 14 | 1105 | 97.5  | 19.6 | 0.108 |
| Juan Jose Alberto Salazar Valencia | 14 | 103  | 102.9 | 33.9 | 0.011 |
| Edwin Espinoza Nina                | 14 | 112  | 69.6  | 35.6 | 0.008 |
| Alejandro Vilca Mamani             | 14 | 843  | 112.5 | 8.9  | 0.095 |
| Miguel Antonio Grandiller Olivera  | 14 | 356  | 122.2 | 6.9  | 0.044 |
| Gumerindo Panduro Linares          | 14 | 498  | 116.5 | 23.1 | 0.058 |
| Agustin Diaz Aparicio              | 14 | 24   | 105.9 | 24.2 | 0.003 |
| Luz Eva Valdivia Sanchez           | 14 | 816  | 113.2 | 15.5 | 0.092 |
| Jorge Lipa Menacho                 | 14 | 235  | 112.6 | 27.3 | 0.026 |
| Juliana Parillo Quispe             | 14 | 803  | 104.8 | 8.3  | 0.084 |
| Nancy Rosmeri Macochoa Tapia       | 14 | 464  | 111.9 | 10.1 | 0.052 |
| Maria Zaida Rodriguez Tapuy        | 14 | 519  | 104.1 | 16.1 | 0.054 |
| Luis Collque Quispe                | 14 | 1023 | 113.3 | 10.9 | 0.116 |
| Berlinda Arias De Simplicio        | 14 | 1761 | 110.6 | 12.8 | 0.195 |
| Hilario Grifa Palla                | 14 | 1053 | 114.7 | 16.2 | 0.121 |
| Lina Sahuarico Begazo              | 14 | 850  | 115.7 | 12.8 | 0.098 |
| Andres Cutipa Gonzales             | 14 | 260  | 99.8  | 29.8 | 0.025 |
| Francisca Consuelo Cahuana Saravia | 14 | 276  | 120.4 | 25.0 | 0.033 |
| Madeley Tapuy Palla                | 14 | 578  | 109.9 | 9.7  | 0.064 |
| Carlos Gongora Cabaña              | 14 | 643  | 109.7 | 21.4 | 0.071 |
| Javier Roman Mejia Flores          | 14 | 1544 | 109.3 | 8.2  | 0.169 |
| Yobana Melendez Tamachiro          | 14 | 1020 | 109.6 | 11.9 | 0.112 |
| Delfin Hugo Mejia Rivera           | 14 | 528  | 103.3 | 29.4 | 0.055 |
| Eufrosia Parillo Quispe            | 14 | 443  | 111.6 | 9.5  | 0.049 |
| Edgar Collado Delgado              | 14 | 2929 | 98.4  | 11.1 | 0.288 |
| Miguel Silva Pereira               | 14 | 571  | 92.5  | 22.4 | 0.053 |
| Ignacio Noa Grifa                  | 14 | 563  | 96.3  | 14.0 | 0.054 |
| Wilfredo Valdez Macochoa           | 14 | 843  | 105.5 | 14.4 | 0.089 |
| Hipolito Cesar Condori Limpe       | 14 | 625  | 112.3 | 11.3 | 0.070 |



|                                   |    |      |       |      |       |
|-----------------------------------|----|------|-------|------|-------|
| Aurelio Armando Mamani Mamani     | 14 | 1173 | 114.3 | 11.7 | 0.134 |
| Francisco Almanza Diaz            | 14 | 240  | 86.1  | 29.7 | 0.021 |
| Saturnino Demetrio Parillo Quispe | 14 | 1628 | 107.2 | 7.6  | 0.174 |
| Maria Elvira Cahuana Tapuy        | 14 | 1215 | 111.2 | 13.9 | 0.135 |
| Juan Gutierrez Inuma              | 14 | 697  | 105.8 | 28.2 | 0.074 |
| Fermin Cruz Rodriguez             | 14 | 240  | 100.6 | 28.6 | 0.024 |
| Eustaquio Paro Cayo               | 14 | 1024 | 117.0 | 11.3 | 0.120 |
| Marcelino Cruz Apaza              | 14 | 725  | 113.3 | 16.6 | 0.082 |
| Felix Alvarez Gonzales            | 14 | 1033 | 114.0 | 13.2 | 0.118 |
| Marcial Pacco Espinoza            | 14 | 503  | 102.2 | 9.6  | 0.051 |
| Lener Vilchez Vasquez             | 14 | 527  | 104.2 | 12.5 | 0.055 |
| Edwin Mamani Suri                 | 14 | 1162 | 109.2 | 8.5  | 0.127 |
| Luis Alberto Ingaruca Báez        | 14 | 503  | 94.0  | 9.2  | 0.047 |
| Iris Tije Dea                     | 14 | 509  | 104.2 | 8.7  | 0.053 |
| Jose Luis Huayllani Huamani       | 14 | 1595 | 103.9 | 11.8 | 0.166 |
| Edwin Yoel Puma Tapuy             | 14 | 970  | 99.2  | 8.5  | 0.096 |
| Elena Paredes Espinoza            | 14 | 998  | 106.2 | 9.5  | 0.106 |
| Manuel Huanuire Econema           | 14 | 887  | 106.6 | 9.6  | 0.095 |
| Edwin Tineo Villafuerte           | 14 | 1171 | 104.8 | 9.0  | 0.123 |
| Telésforo Vásquez Zavaleta        | 14 | 1083 | 99.8  | 9.3  | 0.108 |
| Juana Contreras Suclli            | 14 | 1065 | 96.2  | 9.2  | 0.102 |
| Olger Jacinto Mochcco Muñoz       | 14 | 1417 | 99.2  | 8.5  | 0.141 |
| Carmen Rosa Olivera Gutierrez     | 14 | 943  | 99.5  | 8.2  | 0.094 |
| Gabriela Rossana Parillo Quispe   | 14 | 603  | 105.2 | 10.2 | 0.063 |
| Claudia Rosa Gutierrez Cruz       | 14 | 951  | 94.0  | 13.7 | 0.089 |
| Hilaria Gina Lipa Gil             | 14 | 1157 | 104.8 | 8.9  | 0.121 |
| Alipio Arnolio Poma Checalla      | 14 | 998  | 107.8 | 9.4  | 0.108 |
| Olga Gutierrez Cruz               | 14 | 909  | 103.2 | 8.7  | 0.094 |
| Laly Delcy Sahuarico Tuesta       | 14 | 745  | 101.1 | 11.0 | 0.075 |
| Jose Carmen Saavedra Damian       | 14 | 818  | 93.7  | 13.0 | 0.077 |
| Elar Parillo Quispe               | 14 | 1223 | 103.6 | 10.1 | 0.127 |
| Hubert Daniel Padilla Flores      | 14 | 754  | 93.5  | 14.4 | 0.071 |
| Silvestre Núñez Vásquez           | 14 | 647  | 101.2 | 11.5 | 0.065 |
| Sonia Blanco Yupanqui             | 14 | 779  | 103.8 | 16.9 | 0.081 |
| Nathi Jesica Sánchez Vera         | 14 | 1558 | 99.3  | 10.8 | 0.155 |
| Eusebio Lima Laura                | 14 | 778  | 101.6 | 7.7  | 0.079 |
| Diana Natalia Tohalino Rios       | 14 | 662  | 105.1 | 9.3  | 0.070 |
| Jose Luis Quispe Condori          | 14 | 950  | 101.0 | 12.6 | 0.096 |
| Telly Lisbeth Mendoza Vera        | 14 | 519  | 90.4  | 12.4 | 0.047 |
| Javier Luis Limpías Howard        | 14 | 760  | 100.1 | 8.8  | 0.076 |
| Rosa Gonzáles Cruz                | 14 | 1504 | 98.8  | 12.2 | 0.149 |
| Georgina Lezama López             | 14 | 1193 | 103.7 | 10.1 | 0.124 |
| Agustina Zavala Mamani            | 14 | 503  | 91.3  | 15.7 | 0.046 |

|                                   |    |      |       |      |       |
|-----------------------------------|----|------|-------|------|-------|
| Elkjaer Albert Farfán Noa         | 14 | 768  | 82.4  | 17.1 | 0.063 |
| Isabel Vizcarra Yatto             | 14 | 1127 | 94.0  | 10.5 | 0.106 |
| Lebana Olivia Quispe Sueros       | 14 | 205  | 107.0 | 26.3 | 0.022 |
| José Cahuana Saravia              | 14 | 861  | 95.1  | 15.1 | 0.082 |
| Emma Tije Dea                     | 14 | 1282 | 93.9  | 16.6 | 0.120 |
| Roger Tije Dea                    | 14 | 723  | 103.0 | 9.6  | 0.074 |
| Urias Valdéz Tapuy                | 14 | 643  | 101.6 | 12.5 | 0.065 |
| Víctor Macochoa Noa               | 14 | 43   | 113.1 | 27.8 | 0.005 |
| Víctor Elmer Sahuarico Begazo     | 14 | 362  | 92.1  | 14.2 | 0.033 |
| Martín Noel Quispe Vicente        | 14 | 1166 | 104.3 | 11.9 | 0.122 |
| Rocío Luz Mamani Ancco            | 14 | 689  | 84.6  | 19.3 | 0.058 |
| Lina Adneyda Valdéz Sahuarico     | 14 | 982  | 98.2  | 17.9 | 0.096 |
| Pascual Flores Castillejos        | 14 | 1009 | 102.8 | 9.7  | 0.104 |
| Nelson Herrin Noa Grifa           | 14 | 483  | 90.7  | 30.7 | 0.044 |
| Lucidio Acosta Juvino             | 14 | 1384 | 101.0 | 9.0  | 0.140 |
| María Mory Cumary                 | 14 | 721  | 85.5  | 16.3 | 0.062 |
| Estanislao Rodríguez Ramos        | 14 | 499  | 106.4 | 8.5  | 0.053 |
| Raul Poviz Rojas                  | 14 | 588  | 96.9  | 11.5 | 0.057 |
| Ulises Arimuya Grifa              | 14 | 835  | 117.1 | 10.1 | 0.098 |
| Teresa Pizango Navi               | 14 | 681  | 107.3 | 12.7 | 0.073 |
| Martina Sabina Mamani Cahuana     | 14 | 319  | 108.8 | 13.7 | 0.035 |
| José Mario Noa Grifa              | 14 | 1093 | 121.0 | 8.2  | 0.132 |
| Juan Navarrete Huamán             | 14 | 471  | 110.2 | 9.2  | 0.052 |
| Hilda Dea Rodríguez               | 14 | 444  | 114.4 | 9.8  | 0.051 |
| Héctor Ernesto Pizango Navi       | 14 | 911  | 117.7 | 10.1 | 0.107 |
| Factor Calatayud Curo             | 14 | 1403 | 105.6 | 24.5 | 0.148 |
| Edilberto Dea Rodríguez           | 14 | 526  | 118.8 | 9.3  | 0.062 |
| Daniel Mamani Jaramillo           | 14 | 861  | 115.9 | 11.9 | 0.100 |
| Carlos Dea Campo                  | 14 | 920  | 117.5 | 14.2 | 0.108 |
| Asunta Olivia Díaz Moreno         | 14 | 845  | 119.0 | 11.1 | 0.101 |
| Gerónimo Quispe Quispe            | 14 | 1046 | 116.6 | 23.0 | 0.122 |
| Sebastian Tapuy Panduro           | 14 | 1057 | 118.0 | 11.9 | 0.125 |
| Valentín Parrillo Yerba           | 14 | 988  | 112.5 | 9.4  | 0.111 |
| Lucio Andrés Pizango Navi         | 14 | 2432 | 116.8 | 9.9  | 0.284 |
| Augusto Arimuya Quispe            | 14 | 500  | 115.6 | 9.9  | 0.058 |
| Ángel Torres Racua                | 14 | 735  | 109.0 | 21.3 | 0.080 |
| Alejandroloboasayag               | 14 | 458  | 106.0 | 13.1 | 0.049 |
| Manuelriverodíaz                  | 14 | 1538 | 93.9  | 10.3 | 0.144 |
| María Vilmarojaspari              | 14 | 727  | 98.4  | 15.2 | 0.072 |
| Rony Cardicel Perez               | 14 | 791  | 114.5 | 12.1 | 0.091 |
| Teodoro Mamani Mamani             | 14 | 317  | 87.9  | 27.9 | 0.028 |
| Carlos Alejandro Balarezo Panduro | 14 | 197  | 87.3  | 22.4 | 0.017 |
| Edgar Belluma Huanuire            | 14 | 1057 | 120.4 | 8.2  | 0.127 |

|                                         |    |      |       |      |       |
|-----------------------------------------|----|------|-------|------|-------|
| Noemi Quiroz Diaz                       | 14 | 924  | 114.1 | 13.4 | 0.105 |
| Fredy Aliaga Condori                    | 14 | 2029 | 114.5 | 12.6 | 0.232 |
| Agustin Huamani Anco                    | 14 | 85   | 102.4 | 12.2 | 0.009 |
| Jose Javier Huinga Maceda               | 14 | 433  | 105.5 | 11.2 | 0.046 |
| Carmelo Moreno Huanuire                 | 14 | 599  | 114.6 | 6.5  | 0.069 |
| Maria Encarnacion Perdiz Guzman         | 14 | 545  | 116.1 | 8.5  | 0.063 |
| Gabriel Eduardo Tejada Aguirre          | 14 | 818  | 115.0 | 9.3  | 0.094 |
| Gloria Gonzales Guzman                  | 14 | 518  | 113.9 | 13.1 | 0.059 |
| Benancio Huani Inuma                    | 14 | 3529 | 109.1 | 9.1  | 0.385 |
| Oscar Vega Navi                         | 14 | 174  | 89.9  | 19.3 | 0.016 |
| Luis Racua Salazar                      | 14 | 519  | 110.2 | 20.4 | 0.057 |
| Leonardo Quispe Quispe                  | 14 | 322  | 102.1 | 14.5 | 0.033 |
| Maria Rosa Vargas Racua                 | 14 | 617  | 108.2 | 23.1 | 0.067 |
| Esteban Halanocca Quispe                | 14 | 238  | 108.8 | 14.8 | 0.026 |
| Maria Del Carmen Cristina Perdiz Valera | 14 | 1800 | 110.7 | 19.9 | 0.199 |
| Nely Quispe Miranda                     | 14 | 1566 | 106.9 | 8.2  | 0.167 |
| Teobaldo Reategui Rodriguez             | 14 | 662  | 115.1 | 8.9  | 0.076 |
| Santos Agapito Cruz                     | 14 | 148  | 89.5  | 31.1 | 0.013 |
| Roy Mario Dueñas Taricuarima            | 14 | 1752 | 115.6 | 8.8  | 0.203 |
| Pascual Huaman Fuentes                  | 14 | 224  | 117.2 | 7.8  | 0.026 |
| Odilia Tehuay Sanda                     | 14 | 658  | 98.5  | 13.2 | 0.065 |
| Nicolas Argandoña Piña                  | 14 | 104  | 115.6 | 14.8 | 0.012 |
| Maximo Loayza Benites                   | 14 | 347  | 108.9 | 32.2 | 0.038 |
| Martin Enriquez Valencia                | 14 | 775  | 108.0 | 11.3 | 0.084 |
| Maria Paccosoncco Castillo              | 14 | 630  | 121.9 | 12.7 | 0.077 |
| Maria Estela Perdiz Valera              | 14 | 1164 | 117.2 | 17.6 | 0.136 |
| Maria Argandoña Piña                    | 14 | 51   | 114.8 | 7.9  | 0.006 |
| Marcelina Flores Rengifo                | 14 | 795  | 118.6 | 7.3  | 0.094 |
| Leonidas Morales Zegarra                | 14 | 2706 | 119.2 | 7.4  | 0.323 |
| Julia Yumbo Canelos                     | 14 | 1381 | 119.7 | 7.3  | 0.165 |
| Juan Tito Condori Suyo                  | 14 | 242  | 118.1 | 17.1 | 0.029 |
| Jorge W. Galindo Tineo                  | 14 | 395  | 109.9 | 11.7 | 0.043 |
| Jesus Racua Rodriguez                   | 14 | 62   | 106.5 | 25.4 | 0.007 |
| Jesus Chavez Vargas                     | 14 | 190  | 98.7  | 28.4 | 0.019 |
| Jessica Sharmey Cordova Narvaez         | 14 | 586  | 119.8 | 8.7  | 0.070 |
| Ignacio Condori Flores                  | 14 | 326  | 113.9 | 24.2 | 0.037 |
| Hugo Alvarez Belzon                     | 14 | 584  | 115.8 | 10.7 | 0.068 |
| Hermelinda Pacco Molina                 | 14 | 484  | 105.7 | 24.2 | 0.051 |
| Hermelinda Argandoña Piña               | 14 | 82   | 113.6 | 14.9 | 0.009 |
| Guillermo Miguel Racua Caya             | 14 | 216  | 91.1  | 31.8 | 0.020 |
| Edwinson Edgar Torres Gonzales          | 14 | 316  | 105.3 | 29.4 | 0.033 |
| Edinson Eloy Gongora Martinez           | 14 | 521  | 96.3  | 25.9 | 0.050 |
| Cristobal Sullca Huaman                 | 14 | 892  | 107.2 | 12.4 | 0.096 |

|                                 |    |      |       |      |       |
|---------------------------------|----|------|-------|------|-------|
| Cirilo Condori Atamari          | 14 | 2585 | 115.8 | 15.3 | 0.299 |
| Braulio Serrano Valenzuela      | 14 | 659  | 120.1 | 7.8  | 0.079 |
| Benito Escalante Quispe         | 14 | 554  | 111.9 | 10.5 | 0.062 |
| Asunta Amasifuen De Llamas      | 14 | 1369 | 120.3 | 10.2 | 0.165 |
| Anselmo Racua Mariche           | 14 | 131  | 98.0  | 42.9 | 0.013 |
| Alfredo Zeballos Mozombite      | 14 | 363  | 126.3 | 4.6  | 0.046 |
| Alfredo Alberto Collazos Caycho | 14 | 51   | 110.0 | 29.2 | 0.006 |
| Adan Baltazar Pacherez Salazar  | 14 | 515  | 114.4 | 10.0 | 0.059 |
| Abigail Sanz Salinas            | 14 | 896  | 112.6 | 12.9 | 0.101 |
| Jorge Vargas Quiroz             | 14 | 1358 | 109.9 | 18.2 | 0.149 |
| Flora Yatto Flores              | 14 | 990  | 103.8 | 13.1 | 0.103 |
| Miguel Jorge Zevallos Narvaes   | 14 | 736  | 111.8 | 19.2 | 0.082 |
| Rene Toribio Coral Reategui     | 14 | 1905 | 106.5 | 8.3  | 0.203 |
| Juan Becerra Gallegos           | 14 | 1067 | 117.6 | 10.1 | 0.125 |
| Juan Diaz Huesembe              | 14 | 1704 | 118.8 | 6.2  | 0.202 |
| Gueisa Gonzales De Rodriguez    | 14 | 442  | 108.8 | 21.1 | 0.048 |
| Elia Del Aguila Chavez          | 14 | 676  | 107.4 | 26.9 | 0.073 |
| Patricia Jilapa De Flores       | 14 | 1262 | 112.3 | 11.4 | 0.142 |
| Juan Araujo Sangama             | 14 | 1459 | 108.8 | 14.4 | 0.159 |
| Eulogia Cutipa Ayma             | 14 | 353  | 107.8 | 11.0 | 0.038 |
| Celso Flores Sanipico           | 14 | 1442 | 113.3 | 11.8 | 0.163 |
| Cesar Augusto Reyna Durand      | 14 | 172  | 100.9 | 17.6 | 0.017 |
| Melquiades Farfan Blanco        | 14 | 489  | 101.7 | 31.6 | 0.050 |
| Serapio Velasquez Limpi         | 14 | 1144 | 118.8 | 6.6  | 0.136 |
| Nilda Mendoza Arguedas          | 14 | 1324 | 106.1 | 19.4 | 0.140 |
| Felipe Borda Flores             | 14 | 438  | 104.9 | 23.7 | 0.046 |
| Santos Saul Moreno Econema      | 14 | 795  | 116.5 | 10.5 | 0.093 |
| Leopoldo Flores Rodriguez       | 14 | 1016 | 117.1 | 20.1 | 0.119 |
| Andres Guerra Irarica           | 14 | 428  | 110.2 | 19.3 | 0.047 |
| Milqueades Hanco Sulla          | 14 | 1250 | 94.3  | 19.2 | 0.118 |
| Julian Condori Atamari          | 14 | 992  | 116.7 | 11.3 | 0.116 |
| Maria Belma Bemuya Gongora      | 14 | 1095 | 119.0 | 8.3  | 0.130 |
| Matilde Giersch Dumay           | 14 | 916  | 100.7 | 15.9 | 0.092 |
| Nazreth Mayta Chirinos          | 14 | 568  | 113.7 | 10.8 | 0.065 |
| Victor Quispe Flores            | 14 | 1475 | 110.6 | 11.9 | 0.163 |
| Ines Pastor Gongora             | 14 | 569  | 105.8 | 16.1 | 0.060 |
| Enrique Moreno Aguirre          | 14 | 1377 | 115.3 | 11.1 | 0.159 |
| Luz M Menacho Sanchez           | 14 | 992  | 112.3 | 12.6 | 0.111 |
| Wilber Jacinto Pierola Huasco   | 14 | 400  | 110.6 | 6.7  | 0.044 |
| Manuel Caituiro Barriales       | 14 | 295  | 113.1 | 16.1 | 0.033 |
| Delia Howard De Limpias         | 14 | 273  | 38.8  | 40.1 | 0.011 |
| Julio Saldaña Grandes           | 14 | 1058 | 116.6 | 7.3  | 0.123 |
| Evangelino Leguia Palacios      | 14 | 486  | 101.0 | 18.0 | 0.049 |

|                                |    |      |       |      |       |
|--------------------------------|----|------|-------|------|-------|
| Omar Maileva Vargas            | 14 | 687  | 97.1  | 13.9 | 0.067 |
| Lola Ibañez Flores             | 14 | 1096 | 116.8 | 11.0 | 0.128 |
| Hector Pautre Miashiro         | 14 | 1354 | 119.5 | 10.3 | 0.162 |
| Alejandrina Troncoso Valdivia  | 14 | 1558 | 114.8 | 10.8 | 0.179 |
| Andrea Ramos Papa              | 14 | 1082 | 115.5 | 11.4 | 0.125 |
| Norma Sanchez Irarica          | 14 | 452  | 122.1 | 6.0  | 0.055 |
| Enrique Paucar Valdivia        | 14 | 2640 | 118.5 | 7.1  | 0.313 |
| Rafael Pedraza Ariza           | 14 | 1929 | 101.6 | 23.5 | 0.196 |
| Luis Pautre Perez              | 14 | 1540 | 106.9 | 15.7 | 0.165 |
| Bernabe Ccarita Florez         | 14 | 972  | 90.0  | 24.6 | 0.087 |
| Julian Laura Duran             | 14 | 691  | 104.7 | 9.9  | 0.072 |
| Sabino Huaman Ccopa            | 14 | 770  | 105.9 | 15.2 | 0.082 |
| Mario Huaman Ccopa             | 14 | 575  | 121.1 | 4.2  | 0.070 |
| Eugenio Carrasco Durand        | 14 | 649  | 114.6 | 11.5 | 0.074 |
| Zenia Luna Centeno             | 14 | 1137 | 116.6 | 8.4  | 0.133 |
| Facundo Cahuantico Cahuantico  | 14 | 856  | 114.8 | 13.3 | 0.098 |
| Enrique Montesinos Tinta       | 14 | 1225 | 103.3 | 10.5 | 0.127 |
| Segundina Quispe Vera          | 14 | 1804 | 119.4 | 9.2  | 0.215 |
| Andres Avelino Rojas Aguirre   | 14 | 828  | 115.8 | 11.6 | 0.096 |
| Bradimiro Grifa Noa            | 14 | 384  | 117.9 | 9.2  | 0.045 |
| Hortensia Canelos Macochoa     | 14 | 1767 | 116.7 | 10.9 | 0.206 |
| Juan Lucio Palomino Choque     | 14 | 886  | 105.0 | 8.0  | 0.093 |
| Salome Lesmes Chavez Cardenas  | 14 | 1310 | 101.3 | 13.0 | 0.133 |
| Laurentis Huamani Valdez       | 14 | 1022 | 117.7 | 15.4 | 0.120 |
| Lucia Taricuarima De Dueñas    | 14 | 845  | 118.4 | 6.6  | 0.100 |
| Juan Melendres Perez           | 14 | 1536 | 109.2 | 16.4 | 0.168 |
| Gavino Huayhua Vilca           | 14 | 1529 | 115.0 | 9.6  | 0.176 |
| Jesus Torres Vasquez           | 14 | 1120 | 108.1 | 13.5 | 0.121 |
| Elvira Yatto Tibubay           | 14 | 1195 | 110.1 | 13.7 | 0.132 |
| Fidelia Quiros Grifa           | 14 | 1159 | 105.8 | 17.2 | 0.123 |
| Alejandro Aranibar Ochoa       | 14 | 204  | 116.7 | 9.1  | 0.024 |
| Felipa Huamani Anco            | 14 | 1336 | 101.6 | 15.5 | 0.136 |
| Elda Luz Vera Gonzales         | 14 | 612  | 101.6 | 10.7 | 0.062 |
| Jorge Sota Santos              | 14 | 862  | 105.3 | 15.2 | 0.091 |
| Juan Manuel Huamani Anco       | 14 | 622  | 97.2  | 19.2 | 0.060 |
| Justa Castro Quispe            | 14 | 615  | 104.8 | 32.0 | 0.064 |
| Raymundo Jaen Salva            | 14 | 764  | 106.9 | 17.4 | 0.082 |
| Segundo Chavez Giersch         | 14 | 684  | 101.2 | 15.6 | 0.069 |
| Leonarda Otorongo Quispe       | 14 | 839  | 105.2 | 21.1 | 0.088 |
| Doralisa Muchari Viuda de Soto | 14 | 2959 | 115.0 | 8.3  | 0.340 |
| Lizardo Rodriguez Sanchez      | 14 | 647  | 120.5 | 8.7  | 0.078 |
| Maria Domiciana Vela Medina    | 14 | 622  | 116.3 | 9.8  | 0.072 |
| Isabel Canales Flores          | 14 | 1895 | 115.1 | 11.5 | 0.218 |

|                                |    |      |       |      |       |
|--------------------------------|----|------|-------|------|-------|
| Andres Martin Lazo Pizango     | 14 | 1667 | 120.9 | 6.4  | 0.202 |
| Fidelia Mamani Pari            | 14 | 620  | 117.6 | 18.6 | 0.073 |
| Florentino Cañari Turpo        | 14 | 789  | 117.7 | 8.0  | 0.093 |
| Maria Lopez Vera               | 14 | 1554 | 115.9 | 12.0 | 0.180 |
| Angel Bustamante Huallpayunca  | 14 | 269  | 115.7 | 8.8  | 0.031 |
| Domingo Carpio Claros          | 14 | 904  | 115.5 | 19.7 | 0.104 |
| Julio Izquierdo Sangama        | 14 | 1083 | 108.1 | 14.8 | 0.117 |
| Luis Reynaldo Canelos Grifa    | 14 | 746  | 113.9 | 15.6 | 0.085 |
| Alida Arias Pizango            | 14 | 467  | 112.0 | 12.9 | 0.052 |
| Vicencio Yaricahua Nieto       | 14 | 1235 | 103.8 | 14.2 | 0.128 |
| Albino Gonzales Erpillo        | 14 | 1013 | 95.0  | 22.8 | 0.096 |
| Anselmo Leonidas Estrada Yepez | 14 | 591  | 94.6  | 14.4 | 0.056 |
| Enrique Escompani Viñas        | 14 | 1011 | 122.5 | 4.1  | 0.124 |
| Francisco Chavez Chura         | 14 | 176  | 111.0 | 24.3 | 0.020 |
| German Revilla Gonzales        | 14 | 539  | 103.4 | 26.7 | 0.056 |
| Hernan Bermudez Aparicio       | 14 | 2009 | 119.4 | 7.4  | 0.240 |
| Isabel Enriquez De Vela        | 14 | 1366 | 117.3 | 9.7  | 0.160 |
| Leonor Quispe Huaman           | 14 | 2075 | 104.7 | 9.2  | 0.217 |
| Liberata Luna Yupanqui         | 14 | 1100 | 112.9 | 10.1 | 0.124 |
| Madeleyne Valdivia Vela        | 14 | 1873 | 117.3 | 8.1  | 0.220 |
| Mario Valencia Ccoñislla       | 14 | 1892 | 94.3  | 15.9 | 0.178 |
| Nelson Belluma Huanuyre        | 14 | 191  | 85.3  | 31.3 | 0.016 |
| Wily Alfredo Torrejon Machaca  | 14 | 3320 | 114.0 | 10.6 | 0.378 |
| Alejandro Sajami Sinti         | 14 | 1159 | 118.1 | 9.3  | 0.137 |
| Juan Moreno Aguirre            | 14 | 981  | 112.6 | 13.2 | 0.110 |
| Juana Julia Gongora Cabana     | 14 | 493  | 111.1 | 14.6 | 0.055 |
| Erasmus Cardicel Tananta       | 14 | 793  | 116.1 | 9.3  | 0.092 |
| Gavino Rojas Montalvo          | 14 | 500  | 110.3 | 19.6 | 0.055 |
| Mirta Carreño Guevara          | 14 | 3393 | 117.9 | 8.4  | 0.400 |
| Ines Siani Beyuma              | 14 | 660  | 119.5 | 7.1  | 0.079 |
| Saturnina Maileva Chavez       | 14 | 1136 | 118.8 | 12.7 | 0.135 |
| Rosa Julia Huanca Tintaya      | 14 | 1041 | 120.7 | 5.1  | 0.126 |
| Tiburcio Mescoco Segundo       | 14 | 1048 | 104.1 | 13.8 | 0.109 |
| Tomasa Huaman Oblitas          | 14 | 231  | 117.8 | 5.1  | 0.027 |
| Luis Hernan Lopez Torres       | 14 | 1250 | 106.6 | 22.8 | 0.133 |
| Bertha Olivera Palomino        | 14 | 576  | 102.9 | 17.0 | 0.059 |
| Luisa Ochoa Puma               | 14 | 950  | 108.9 | 14.8 | 0.103 |
| Alfredo Moreno Fuller          | 14 | 1026 | 120.0 | 10.7 | 0.123 |
| Alcides Bocangel Estrada       | 14 | 1359 | 120.6 | 8.1  | 0.164 |
| Angel Fuentes Torres           | 14 | 1172 | 106.2 | 12.2 | 0.125 |
| Dominga Mayta Salcedo          | 14 | 1215 | 100.1 | 17.3 | 0.122 |
| Helberth Merma Ancco           | 14 | 889  | 102.8 | 16.4 | 0.091 |
| Julian Vera Papa               | 14 | 722  | 104.9 | 23.5 | 0.076 |

|                                     |    |      |       |      |       |
|-------------------------------------|----|------|-------|------|-------|
| Margarita Venilda Rodriguez Benites | 14 | 726  | 109.4 | 15.7 | 0.079 |
| Romulo Condori Condori              | 14 | 418  | 109.1 | 7.5  | 0.045 |
| Reynaldo Kuno Cumpa                 | 14 | 621  | 117.0 | 12.2 | 0.073 |
| Ruben Uartiaga Murrieta             | 14 | 440  | 121.1 | 9.9  | 0.053 |
| Sabina Condori de Chura             | 14 | 41   | 96.5  | 30.1 | 0.004 |
| Teofilo Pedraza Ariza               | 14 | 806  | 117.9 | 11.2 | 0.095 |
| Margarita Azucena Morales Zegarra   | 14 | 888  | 108.7 | 15.3 | 0.096 |
| Matias Huamani Flores               | 14 | 604  | 100.9 | 16.7 | 0.061 |
| Ana Aimituma Huanca                 | 14 | 1426 | 103.1 | 20.3 | 0.146 |
| Leonardo Sanchez Pinedo             | 14 | 654  | 118.7 | 11.6 | 0.078 |
| Pedro Quispe Quispe                 | 14 | 648  | 106.9 | 26.9 | 0.069 |
| Mateo Vargas Dueñas                 | 14 | 639  | 112.7 | 11.8 | 0.072 |
| Andres Igidio Gamarra Ayma          | 14 | 1012 | 102.5 | 17.1 | 0.104 |
| Samuel Huamani Aranguri             | 14 | 371  | 111.2 | 16.3 | 0.041 |
| Alcides Ccuno Chahuara              | 14 | 1187 | 106.1 | 9.8  | 0.126 |
| Robustiano Lima Quispe              | 14 | 579  | 114.3 | 17.5 | 0.066 |
| Felix Mamani Yucra                  | 14 | 1546 | 113.2 | 8.1  | 0.175 |
| Domingo Guzman Borda Flores         | 14 | 1172 | 109.6 | 11.6 | 0.128 |
| Rene Florencio Vargas Pineda        | 14 | 293  | 107.2 | 14.6 | 0.031 |
| Benilde Pacherras Salazar           | 14 | 1192 | 117.2 | 8.6  | 0.140 |
| Damaso Irco Mamani                  | 14 | 877  | 106.3 | 10.7 | 0.093 |
| Marta Condori Quispe                | 14 | 978  | 103.6 | 14.3 | 0.101 |
| Raymundo Caballero Gonzales         | 14 | 166  | 112.9 | 19.8 | 0.019 |
| Adrian Miranda Martinez             | 14 | 1153 | 114.9 | 12.6 | 0.132 |
| Humberto Mayta Aguirre              | 14 | 444  | 106.7 | 17.8 | 0.047 |
| Antonio Pinedo Ramirez              | 14 | 843  | 107.1 | 11.5 | 0.090 |
| Hernan Jimenes Llanos               | 14 | 119  | 100.8 | 28.6 | 0.012 |
| Julissa Roxana Herrera Alpiri       | 14 | 527  | 106.9 | 9.3  | 0.056 |
| Blanca Luz Vargas Pashanaste        | 14 | 849  | 118.0 | 13.5 | 0.100 |
| Pedro Crisologo Moreno Huanuyre     | 14 | 1057 | 115.8 | 16.9 | 0.122 |
| Juan Enrique Pereyra Guerra         | 14 | 1362 | 122.0 | 12.8 | 0.166 |
| Julian Mora Huaman                  | 14 | 723  | 117.5 | 10.0 | 0.085 |
| Guillermo Velarde Castro            | 14 | 1004 | 100.2 | 10.8 | 0.101 |
| Guillermo Flores Cama               | 14 | 1084 | 102.6 | 27.4 | 0.111 |
| Regina Mamani De Ramirez            | 14 | 954  | 99.5  | 18.0 | 0.095 |
| Luis Anarco Mamani Balarezo         | 14 | 908  | 107.4 | 14.6 | 0.098 |
| Julio Cesar Moreno Aguirre          | 14 | 385  | 114.8 | 18.1 | 0.044 |
| Alipio Olivera Estrada              | 14 | 874  | 93.2  | 21.6 | 0.081 |
| Evangelina Molina Huallpa           | 14 | 1126 | 98.3  | 15.0 | 0.111 |
| Juan Mario Gonzales Rodriguez       | 14 | 1216 | 112.6 | 9.9  | 0.137 |
| Miguel Huaman Salas                 | 14 | 1021 | 112.0 | 8.6  | 0.114 |
| Rolando Samuel Toalino Perez        | 14 | 624  | 102.1 | 19.2 | 0.064 |
| Saturnino Solis Muñoz               | 14 | 1071 | 117.6 | 9.6  | 0.126 |

|                                        |    |      |       |      |       |
|----------------------------------------|----|------|-------|------|-------|
| Leoncio Pacheco Ayala                  | 14 | 336  | 120.1 | 8.3  | 0.040 |
| Pacifico Ferro Capa                    | 14 | 1020 | 104.3 | 13.2 | 0.106 |
| Juan Arnolfo Camargo Nakaganeku        | 14 | 981  | 117.6 | 9.2  | 0.115 |
| Matilde Rodriguez Guevara              | 14 | 850  | 118.4 | 7.3  | 0.101 |
| Vilma Torres Quispe                    | 14 | 832  | 107.8 | 11.9 | 0.090 |
| Manuel Machaca Chambi                  | 14 | 276  | 116.2 | 8.5  | 0.032 |
| Esther Armas Diaz                      | 14 | 955  | 117.9 | 11.5 | 0.113 |
| Silverio Quispe Ttupa                  | 14 | 402  | 109.2 | 25.8 | 0.044 |
| Guilma Guevara Macahuache              | 14 | 1135 | 100.0 | 14.9 | 0.114 |
| Adolfo Vela Hidalgo                    | 14 | 2222 | 102.6 | 16.8 | 0.228 |
| Rosas Condori Condori                  | 14 | 1419 | 90.2  | 32.7 | 0.128 |
| Miguel Angel Maceda Guerra             | 14 | 327  | 107.1 | 4.9  | 0.035 |
| Juan Bautista Uscamayta Huillca        | 14 | 710  | 113.1 | 24.3 | 0.080 |
| Emilio Mercado Roque                   | 14 | 1357 | 105.2 | 25.1 | 0.143 |
| Gerardo Cesar Guzman Quispe            | 14 | 956  | 104.9 | 26.3 | 0.100 |
| Marcos Olgado Quispe                   | 14 | 244  | 100.2 | 24.0 | 0.024 |
| Delfin Rodriguez Flores                | 14 | 1336 | 110.6 | 10.7 | 0.148 |
| Valentin Huaman Amachi                 | 14 | 1100 | 109.6 | 19.2 | 0.121 |
| Ubaldo Fernandez Choquehuanca          | 14 | 1241 | 99.1  | 13.2 | 0.123 |
| Luis Zamalloa Bolivar                  | 14 | 847  | 99.2  | 24.4 | 0.084 |
| Cesario Claudio Espinoza Lenes         | 14 | 844  | 102.4 | 14.4 | 0.086 |
| Fermin Barriga Villamar                | 14 | 1128 | 119.9 | 7.1  | 0.135 |
| Inely Mestanza Villaroel               | 14 | 1253 | 117.1 | 8.9  | 0.147 |
| Julian Onecimo Mercado Palomino        | 14 | 1270 | 110.8 | 17.6 | 0.141 |
| Julio Mercado Sanchez                  | 14 | 400  | 109.9 | 18.5 | 0.044 |
| Grimanesa Magdalena Gonzales Huatanabe | 14 | 1117 | 105.2 | 16.5 | 0.118 |
| Jackeline E. Ugarte Guerra             | 14 | 1403 | 101.9 | 14.7 | 0.143 |
| Jose Audon Auquilla Condori            | 14 | 1072 | 114.3 | 13.0 | 0.123 |
| Hernan Hidalgo Guevara                 | 14 | 1848 | 114.9 | 10.8 | 0.212 |
| Silveria Mamani Choque                 | 14 | 377  | 101.8 | 15.8 | 0.038 |
| Elva Nieves Moreno Econema             | 14 | 797  | 92.5  | 18.0 | 0.074 |
| Martin Ascue Sallo                     | 14 | 406  | 111.2 | 10.5 | 0.045 |
| Silvia Mendoza Bermudes                | 14 | 448  | 112.9 | 8.5  | 0.051 |
| Eddie Lizardo Jimenez Gonzales         | 14 | 1328 | 119.1 | 7.9  | 0.158 |
| Catherine Melendez Vargas              | 14 | 271  | 107.6 | 28.0 | 0.029 |
| Luciano Mamani Perez                   | 14 | 420  | 103.1 | 31.2 | 0.043 |
| Mario Pablo Mamani Chura               | 14 | 644  | 115.4 | 10.4 | 0.074 |
| Teofila Oscalla Espinoza               | 14 | 376  | 106.1 | 11.9 | 0.040 |
| Jose Mamani Choque                     | 14 | 867  | 108.6 | 10.6 | 0.094 |
| Rosita Marisol Trigoso Vargas          | 14 | 666  | 113.3 | 10.6 | 0.075 |
| Romulo Nemesio Perez Mercado           | 14 | 782  | 113.7 | 15.6 | 0.089 |
| Manuel Gamarra. Fuentes                | 14 | 1070 | 109.5 | 17.3 | 0.117 |
| Olimpia Adela Balbin Castañeda         | 14 | 1155 | 116.2 | 10.1 | 0.134 |



|                                        |    |      |       |      |       |
|----------------------------------------|----|------|-------|------|-------|
| Pedro Surco Achahuanca                 | 14 | 803  | 108.0 | 21.2 | 0.087 |
| Armando Taricuarima Mozombite          | 14 | 675  | 109.1 | 18.5 | 0.074 |
| Matilde Vicentina Idme Idme            | 14 | 95   | 107.5 | 20.3 | 0.010 |
| Segundo Salas Pizango                  | 14 | 561  | 104.6 | 13.8 | 0.059 |
| Pedro Nina Huamantica                  | 14 | 467  | 106.7 | 21.4 | 0.050 |
| Enrique Huaman Quispe                  | 14 | 1220 | 106.0 | 21.0 | 0.129 |
| Pedro Torres Racua                     | 14 | 892  | 112.7 | 13.8 | 0.101 |
| Fransisco Diaz Vargas                  | 14 | 425  | 112.0 | 13.2 | 0.048 |
| Martha Sandoval Laurente               | 14 | 682  | 116.9 | 9.4  | 0.080 |
| Victor Huamani Ccamo                   | 14 | 1176 | 117.5 | 10.6 | 0.138 |
| Hermancia Rodriguez Flores             | 14 | 561  | 114.5 | 16.1 | 0.064 |
| Daniel Idme Guetierrez                 | 14 | 24   | 103.5 | 31.7 | 0.002 |
| Manuel Escalante Huaman                | 14 | 1328 | 108.8 | 19.8 | 0.145 |
| Carlos Gutierrez Villamar              | 14 | 370  | 114.4 | 16.4 | 0.042 |
| Isaac Gutierrez Orconi                 | 14 | 422  | 114.8 | 7.1  | 0.048 |
| Adrian Ttito Arenas                    | 14 | 1024 | 112.2 | 18.4 | 0.115 |
| Jose Ayerbes Andaluz                   | 14 | 927  | 101.2 | 23.6 | 0.094 |
| Patricio Leon Mayta Mendoza            | 14 | 270  | 78.7  | 29.1 | 0.021 |
| Segundino Torres Huaman                | 14 | 1427 | 111.4 | 9.2  | 0.159 |
| Juan Gualberto Condori Sullo           | 14 | 395  | 113.5 | 27.4 | 0.045 |
| Celestino Romero Peña                  | 14 | 469  | 114.4 | 13.9 | 0.054 |
| Francisco Mamani Condori               | 14 | 549  | 103.5 | 11.6 | 0.057 |
| Lucinda Novoa De Romero                | 14 | 440  | 112.3 | 20.1 | 0.049 |
| Hilda Giersch De Kojagura              | 14 | 719  | 91.6  | 19.8 | 0.066 |
| Agripino Quispe Tinta                  | 14 | 667  | 103.2 | 13.3 | 0.069 |
| Hector Cardicel Perez                  | 14 | 880  | 112.9 | 9.6  | 0.099 |
| Sofia del Carpio Chair                 | 14 | 678  | 93.8  | 16.7 | 0.064 |
| Antolin Tupac Choque                   | 14 | 855  | 115.9 | 10.7 | 0.099 |
| Lucas Gallegos Mejia                   | 14 | 926  | 106.8 | 18.4 | 0.099 |
| Sotero Gonzales Pacco                  | 14 | 1045 | 117.4 | 9.2  | 0.123 |
| Alfredo Gonzales Romero                | 14 | 744  | 112.6 | 15.8 | 0.084 |
| Jose Flores Pereyra                    | 14 | 410  | 115.0 | 12.4 | 0.047 |
| Celso Julio Zegarra Paiva              | 14 | 1182 | 98.8  | 20.5 | 0.117 |
| Juan Mayta Choque                      | 14 | 582  | 102.8 | 17.0 | 0.060 |
| Nila Delia Peña Mamani                 | 14 | 1113 | 121.4 | 7.7  | 0.135 |
| Honorio Huesembe Chota                 | 14 | 737  | 100.8 | 13.3 | 0.074 |
| Eloy Bernabe Cassanca Rosombite        | 14 | 865  | 104.7 | 9.4  | 0.091 |
| Genaro Concho Gutierrez                | 14 | 669  | 102.6 | 17.7 | 0.069 |
| Jesus Ramos Huaman                     | 14 | 1016 | 110.2 | 8.3  | 0.112 |
| Alvino Lima Cconchoy                   | 14 | 734  | 111.0 | 8.5  | 0.082 |
| Ana Gonzales De Rodriguez              | 14 | 358  | 114.7 | 11.2 | 0.041 |
| Alejandra Celiana Villagaray Gutierrez | 14 | 1355 | 112.7 | 11.8 | 0.153 |
| Leoncio Jasmani Huaraca Jaquehua       | 14 | 277  | 121.3 | 7.6  | 0.034 |

|                                |    |      |       |      |       |
|--------------------------------|----|------|-------|------|-------|
| Alfredo Quispe Ramos           | 14 | 242  | 110.7 | 11.8 | 0.027 |
| Moises Rodriguez Loaiza        | 14 | 613  | 104.6 | 12.0 | 0.064 |
| Wilmer Alvaro Mamani Balarezo  | 14 | 2045 | 115.4 | 10.0 | 0.236 |
| Richard Apaza Mamani           | 14 | 471  | 113.5 | 11.6 | 0.053 |
| Santos Gutierrez Cahuantico    | 14 | 173  | 91.7  | 19.4 | 0.016 |
| Pedro Pipa Maucaylla           | 14 | 357  | 93.2  | 24.7 | 0.033 |
| Felicitas Ramirez Surco        | 14 | 297  | 109.1 | 27.0 | 0.032 |
| Julia Rita Peña Mamani         | 14 | 2158 | 107.2 | 14.7 | 0.231 |
| Raimundo Idme Tihuallanca      | 14 | 481  | 115.3 | 14.6 | 0.055 |
| Serapio Condori Flores         | 14 | 1734 | 94.7  | 17.9 | 0.164 |
| Ynocencio Bacilio Huaman       | 14 | 154  | 112.6 | 22.8 | 0.017 |
| Cirilo Ayma Puma               | 14 | 932  | 102.0 | 33.1 | 0.095 |
| Rosas Condori Condori          | 14 | 553  | 111.0 | 11.0 | 0.061 |
| Lucio Mendoza Quispe           | 14 | 687  | 101.2 | 14.2 | 0.070 |
| Sergio Mendoza Quispe          | 14 | 660  | 107.7 | 12.0 | 0.071 |
| Leonidas Sollace Carpio        | 14 | 507  | 97.5  | 19.5 | 0.049 |
| Delio Mendiguri Mendoza        | 14 | 417  | 108.3 | 25.5 | 0.045 |
| Segundo Torres Sanchez         | 14 | 3547 | 108.5 | 11.3 | 0.385 |
| Juan Carlos Zuñiga Mejia       | 14 | 1017 | 117.6 | 10.1 | 0.120 |
| Exaltacion Carrion Telsi       | 14 | 1851 | 94.6  | 17.7 | 0.175 |
| Georgina Sangama Huesembe      | 14 | 995  | 114.7 | 17.1 | 0.114 |
| Teodocio Ancalle Llamoca       | 14 | 849  | 93.2  | 22.9 | 0.078 |
| Marcelina Gamarra Carrillo     | 14 | 766  | 115.9 | 10.7 | 0.089 |
| Oscar Duran Quispe             | 14 | 2928 | 93.3  | 18.4 | 0.273 |
| Luis Alberto Huesembe Huesembe | 14 | 529  | 102.3 | 13.5 | 0.054 |
| Abel Galindo Izquierdo         | 14 | 1597 | 119.5 | 6.3  | 0.191 |
| Empresa Eko Hotel S.A.C        | 14 | 1457 | 98.0  | 18.2 | 0.143 |
| Rosa Ayma Condori              | 14 | 468  | 113.0 | 10.6 | 0.053 |
| Rafael Lorenzo Jara Quispe     | 14 | 278  | 108.6 | 12.8 | 0.030 |
| Felipe Mayo Yapura             | 14 | 1130 | 122.2 | 10.8 | 0.138 |
| Nelida Cortez Zegarra          | 14 | 2078 | 116.0 | 9.6  | 0.241 |
| Jorge Huamani Chacondori       | 14 | 446  | 118.4 | 5.5  | 0.053 |
| Georgina Pereira Lima          | 14 | 591  | 113.4 | 14.3 | 0.067 |
| Florentino Navi Guevara        | 14 | 653  | 115.9 | 17.1 | 0.076 |
| Fidel Caballero Sajami         | 14 | 467  | 110.7 | 22.5 | 0.052 |
| Ceferina Bautista Ferro        | 14 | 111  | 106.4 | 20.3 | 0.012 |
| Avelino Ricardo Tuesta Guevara | 14 | 95   | 120.2 | 5.3  | 0.011 |
| Agustina Quispe Condo          | 14 | 872  | 92.8  | 23.7 | 0.081 |
| Sergio Papa Manuyama           | 14 | 753  | 112.7 | 22.0 | 0.085 |
| Marcos Mestanza Villaroel      | 14 | 3432 | 121.9 | 9.4  | 0.418 |
| Oswaldo Ponpilla Rosas         | 14 | 597  | 103.9 | 19.2 | 0.062 |
| Carlos Caviñas Balarezo        | 14 | 1841 | 102.9 | 13.8 | 0.189 |
| Sergio Cusi Huaman             | 14 | 71   | 91.9  | 36.1 | 0.007 |

|                                         |    |      |       |      |       |
|-----------------------------------------|----|------|-------|------|-------|
| Victoria Ortega Flores                  | 14 | 689  | 105.9 | 11.3 | 0.073 |
| Juan De Mata Jara Juarez                | 14 | 1167 | 114.7 | 14.9 | 0.134 |
| Alberto Arroyo Merma                    | 14 | 409  | 114.3 | 6.6  | 0.047 |
| Sonia Victoria Santibanez Caceres       | 14 | 607  | 120.3 | 6.9  | 0.073 |
| Esteban Rene Lopez Torres               | 14 | 482  | 114.3 | 16.6 | 0.055 |
| Martina Arenas Callañaupa               | 14 | 1328 | 120.7 | 7.9  | 0.160 |
| Alberto Arroyo Merma                    | 14 | 124  | 109.2 | 5.0  | 0.014 |
| Hipolito Muñoz Sarmiento                | 14 | 394  | 110.4 | 19.8 | 0.043 |
| Nieves Vergas Canamari                  | 14 | 548  | 105.1 | 18.2 | 0.058 |
| Rene Gualberto Mejia David              | 14 | 397  | 106.5 | 25.7 | 0.042 |
| Pablo Callo Condori                     | 14 | 564  | 109.1 | 26.4 | 0.062 |
| Hernando Vega Alpiri                    | 14 | 586  | 94.5  | 26.1 | 0.055 |
| Dionisia Ccorahua De Zapana             | 14 | 624  | 113.6 | 22.2 | 0.071 |
| Juan Tito Meza Huayta                   | 14 | 406  | 99.6  | 33.7 | 0.040 |
| Teresa Argandoño Piña                   | 14 | 544  | 100.4 | 19.1 | 0.055 |
| Javier Ernesto Vera Guevara             | 14 | 1086 | 107.8 | 22.4 | 0.117 |
| Juan Vicente Sanchez Pinedo             | 14 | 2369 | 112.8 | 10.8 | 0.267 |
| Casiano Cahuana Arque                   | 14 | 348  | 115.4 | 14.6 | 0.040 |
| Felipe Mosqueira Trujillo               | 14 | 525  | 106.8 | 11.5 | 0.056 |
| Eulalia Gongora Vera                    | 14 | 827  | 116.0 | 11.5 | 0.096 |
| Juan Gualberto Aguirre Perez            | 14 | 564  | 114.6 | 14.5 | 0.065 |
| Felicitas Macochoa Grifa                | 14 | 277  | 119.5 | 7.4  | 0.033 |
| Victor Collazos Sanchez                 | 14 | 810  | 111.4 | 11.0 | 0.090 |
| Bethy Maria Antas Vasquez               | 14 | 716  | 111.8 | 11.8 | 0.080 |
| Empresa Sol De Selva Rep Tacano Junkich | 14 | 1508 | 104.6 | 21.4 | 0.158 |
| Rodolfo Mamani Yari                     | 14 | 1112 | 108.4 | 26.8 | 0.121 |
| Emperatriz Barra Paucar                 | 14 | 114  | 82.5  | 28.2 | 0.009 |
| Jacinto Moscoso Ramirez                 | 14 | 563  | 113.6 | 10.8 | 0.064 |
| Jose Victor Flores Rodriguez            | 14 | 649  | 115.3 | 16.6 | 0.075 |
| Isabel Tejada Aguirre                   | 14 | 926  | 116.8 | 10.2 | 0.108 |
| Edgar Mendoza Rodriguez                 | 14 | 304  | 94.8  | 33.6 | 0.029 |
| Segundo Juan Izuiza Papa                | 14 | 259  | 103.8 | 7.8  | 0.027 |
| Mauricio Cassa Champi                   | 14 | 200  | 110.0 | 27.9 | 0.022 |
| Jorge David Trigoso Reategui            | 14 | 491  | 115.3 | 9.9  | 0.057 |
| Sonia Flores Dancuar                    | 14 | 2266 | 95.0  | 23.2 | 0.215 |
| Jose Chavez Chambi                      | 14 | 1489 | 117.0 | 7.5  | 0.174 |
| Rafael Mariche Econema                  | 14 | 758  | 115.3 | 10.6 | 0.087 |
| Juan Cansio Chalco Irarica              | 14 | 1500 | 104.3 | 8.7  | 0.156 |
| Carmen Lucy Leon Amasifuen              | 14 | 808  | 114.3 | 9.7  | 0.092 |
| Angelica Amasifuen Palomeque            | 14 | 894  | 112.1 | 11.1 | 0.100 |
| Alfredo Aguirre Rolin                   | 14 | 614  | 116.0 | 9.9  | 0.071 |
| Alfonsa Moreno Aguirre                  | 14 | 989  | 103.6 | 18.1 | 0.102 |
| Grimaldo Sanz Palza                     | 14 | 1169 | 107.3 | 11.5 | 0.125 |

|                                    |    |      |       |      |       |
|------------------------------------|----|------|-------|------|-------|
| Arturo Odon Vela Moreno            | 14 | 508  | 115.7 | 9.4  | 0.059 |
| Antonio Ayma Aranzabal             | 14 | 170  | 109.2 | 27.2 | 0.019 |
| Cecilio Quighua Melo               | 14 | 783  | 98.3  | 25.5 | 0.077 |
| Froilan Quispe Ttupa               | 14 | 1046 | 100.7 | 31.8 | 0.105 |
| Eugenia Ramos Salcedo              | 14 | 965  | 111.8 | 12.8 | 0.108 |
| Liliana Octavia Huamani Pillaca    | 14 | 1061 | 117.3 | 10.0 | 0.124 |
| Villanueva Huamani Suarez          | 14 | 963  | 120.4 | 9.0  | 0.116 |
| Wilson Guzman Ramirez              | 14 | 1876 | 120.0 | 9.2  | 0.225 |
| Javier Marcelino Huaman Quinto     | 14 | 915  | 120.4 | 7.9  | 0.110 |
| Emiliano Flores Merma              | 14 | 46   | 96.3  | 25.6 | 0.004 |
| Juan Toribio Panduro Pizango       | 14 | 276  | 108.6 | 18.8 | 0.030 |
| Roberto Vega Barroso               | 14 | 1305 | 121.6 | 7.7  | 0.159 |
| Aldo Aguirre Rolin                 | 14 | 1040 | 104.7 | 18.4 | 0.109 |
| Juan De La Cruz Cusihuaman Condori | 14 | 381  | 111.6 | 12.9 | 0.043 |
| Maria Francizca Barros Guerra      | 14 | 562  | 112.9 | 9.9  | 0.063 |
| Inocencio Caceres Saloma           | 14 | 768  | 102.9 | 31.7 | 0.079 |
| Cecilia Cacuna Racua               | 14 | 2148 | 106.6 | 22.8 | 0.229 |
| Maria Salome Mendivil Medina       | 14 | 1206 | 111.4 | 18.0 | 0.134 |
| Mateo Tejeira Huillca              | 14 | 596  | 107.2 | 26.1 | 0.064 |
| Cristina Pariguana De Mamani       | 14 | 695  | 112.3 | 17.7 | 0.078 |
| Leonidas Cuno Solis                | 14 | 770  | 119.4 | 9.1  | 0.092 |
| Ambrosio Ayala Huaman              | 14 | 367  | 98.0  | 30.3 | 0.036 |
| Consuelo Arevalo Martinez          | 14 | 719  | 106.1 | 20.7 | 0.076 |
| Pascual Reategui Roque             | 14 | 990  | 116.8 | 12.3 | 0.116 |
| Cecilio Reategui Aguirre           | 14 | 846  | 119.8 | 10.6 | 0.101 |
| Luis Tuesta Guevara                | 14 | 1375 | 122.2 | 6.0  | 0.168 |
| Alfredo Vera Burga                 | 14 | 731  | 98.6  | 12.0 | 0.072 |
| Juaquin Perez Rengifo              | 14 | 970  | 108.0 | 20.6 | 0.105 |
| Mercedes Soria Olgado              | 14 | 544  | 113.9 | 12.9 | 0.062 |
| Angel Fuentes Yupanqui             | 14 | 1453 | 106.6 | 15.1 | 0.155 |
| Luisa Cruz de Viza                 | 14 | 825  | 103.4 | 14.4 | 0.085 |
| Jacinta Huaman Apaza               | 14 | 220  | 109.5 | 18.3 | 0.024 |
| Moises Gutierrez Galicia           | 14 | 991  | 122.4 | 13.5 | 0.121 |
| Jaime Llamas Martinez              | 14 | 1390 | 107.0 | 19.6 | 0.149 |
| Angelica Carrasco De Rocca         | 14 | 1784 | 101.2 | 24.1 | 0.181 |
| Cecilia Adriana Tamashiro Cato     | 14 | 1850 | 98.6  | 23.8 | 0.182 |
| Vicente Oroche Condori             | 14 | 826  | 106.1 | 17.2 | 0.088 |
| Federico Barrientos Martinez       | 14 | 1129 | 121.6 | 5.7  | 0.137 |
| Zoila Berta Vela Vera              | 14 | 1178 | 117.6 | 9.6  | 0.139 |
| Wilfredo Ahuanari Patiño           | 14 | 560  | 112.6 | 16.1 | 0.063 |
| Constantino Huaman Casas           | 14 | 688  | 112.6 | 14.6 | 0.077 |
| Marcelino Huaman Llacma            | 14 | 936  | 96.8  | 19.0 | 0.091 |
| Octavio Montesinos Quispe          | 14 | 814  | 98.6  | 12.9 | 0.080 |

|                                     |    |      |       |      |       |
|-------------------------------------|----|------|-------|------|-------|
| Gumercinda Colque Quispe            | 14 | 1174 | 100.8 | 9.3  | 0.118 |
| Celestino Silva Mamani              | 14 | 1271 | 118.0 | 8.7  | 0.150 |
| Gregorio Garsez Aucapifia           | 14 | 572  | 97.7  | 23.9 | 0.056 |
| Martha Huaman Quispe                | 14 | 738  | 107.0 | 24.1 | 0.079 |
| Jose Moasi Acosta Jovino            | 14 | 958  | 117.5 | 9.6  | 0.113 |
| Aura Dueñas Quispitupa              | 14 | 676  | 117.3 | 8.9  | 0.079 |
| Saturnino Condori Cahuantico        | 14 | 578  | 120.9 | 9.8  | 0.070 |
| Faustino Mamani Huayta              | 14 | 874  | 120.7 | 9.7  | 0.106 |
| Mirian Hanco Bernal                 | 14 | 440  | 123.1 | 3.9  | 0.054 |
| Jessica Mesías Lopez                | 14 | 1038 | 104.9 | 16.5 | 0.109 |
| Pascual Huamani Anco                | 14 | 914  | 96.3  | 12.9 | 0.088 |
| Justo Montaña Avila                 | 14 | 432  | 102.6 | 15.9 | 0.044 |
| Marilin Luz Bautista Barros         | 14 | 546  | 120.4 | 5.5  | 0.066 |
| Serapio Chilca Huaman               | 14 | 1272 | 111.1 | 17.6 | 0.141 |
| Domingo Quispe Pinedo               | 14 | 495  | 117.6 | 8.5  | 0.058 |
| Tito Alfredo Mercado Sanchez        | 14 | 846  | 109.8 | 19.7 | 0.093 |
| Pablo Bolivar Alvarez               | 14 | 298  | 123.2 | 5.4  | 0.037 |
| Juan Onesimo Ayerbes Ohuichi        | 14 | 343  | 109.1 | 19.2 | 0.037 |
| Wilder Reategui Camargo             | 14 | 1012 | 120.1 | 7.1  | 0.122 |
| Nimia Medina Bate                   | 14 | 1998 | 119.9 | 8.6  | 0.240 |
| Juana Mendoza De Escobar            | 14 | 471  | 106.6 | 21.3 | 0.050 |
| Maria Bertha Sangama De Benites     | 14 | 1597 | 106.6 | 20.9 | 0.170 |
| Cosme Dueñas Merma                  | 14 | 1562 | 113.8 | 15.2 | 0.178 |
| Dionicio Quispe Betancur            | 14 | 1672 | 117.9 | 10.9 | 0.197 |
| Maximo Eleuterio Tapia Santos       | 14 | 1363 | 111.6 | 13.7 | 0.152 |
| Ladio Bolivar Huamani               | 14 | 801  | 114.7 | 13.4 | 0.092 |
| Fernando Grifa Palla                | 14 | 1608 | 118.7 | 8.3  | 0.191 |
| Elvis Rodriguez Aguirre             | 14 | 1156 | 120.3 | 8.1  | 0.139 |
| Norma Lute Moreno De Noriega        | 14 | 2446 | 120.0 | 8.1  | 0.293 |
| Jorge Carlos Gonzales Irarica       | 14 | 217  | 100.4 | 17.7 | 0.022 |
| Carlos Aguilar Huaman               | 14 | 244  | 98.5  | 31.0 | 0.024 |
| David Palomino Turpo                | 14 | 151  | 111.4 | 15.0 | 0.017 |
| Marcelo Choque Ramos                | 14 | 191  | 111.9 | 16.0 | 0.021 |
| Esther Sanchez Silva                | 14 | 891  | 114.6 | 5.9  | 0.102 |
| Edith Glady Herboso Reategui        | 14 | 1201 | 120.2 | 10.6 | 0.144 |
| Zaida Huillca Herboso               | 14 | 620  | 111.9 | 11.4 | 0.069 |
| Abed Mancilla Munchari              | 14 | 591  | 98.5  | 15.6 | 0.058 |
| Aureliano Francisco Donaires Orosco | 14 | 2415 | 104.5 | 14.1 | 0.252 |
| Teodocia Victoria Huaraca Maquehua  | 14 | 1126 | 121.1 | 12.0 | 0.136 |
| Joyse Magdalena Moreno Inuma        | 14 | 593  | 114.8 | 8.3  | 0.068 |
| Honorato Pacamia Guerra             | 14 | 795  | 114.1 | 13.1 | 0.091 |
| León Kkano Umalla                   | 14 | 633  | 112.9 | 18.3 | 0.071 |
| Adolfo Morey Tuesta                 | 14 | 1205 | 96.5  | 13.4 | 0.116 |

|                                         |    |      |       |      |       |
|-----------------------------------------|----|------|-------|------|-------|
| Paulino Quispe Ramirez                  | 14 | 1456 | 121.8 | 10.0 | 0.177 |
| Carlos Narciso Moreno Fuller            | 14 | 693  | 110.4 | 14.5 | 0.077 |
| Gregoria Roca Guerra                    | 14 | 704  | 107.8 | 28.6 | 0.076 |
| Julio Saloma Perez                      | 14 | 600  | 109.5 | 27.6 | 0.066 |
| Victoria Cahuana Arque                  | 14 | 1180 | 112.4 | 15.8 | 0.133 |
| Saturnino Villafuerte Blanco            | 14 | 218  | 109.9 | 18.4 | 0.024 |
| Washinton Maceda Irarica                | 14 | 1845 | 122.1 | 7.5  | 0.225 |
| Leandro Flores Huillca                  | 14 | 3201 | 103.8 | 15.3 | 0.332 |
| Siles Flores Rengifo                    | 14 | 1030 | 116.7 | 10.0 | 0.120 |
| Nelson Lopez Aguirre                    | 14 | 1358 | 112.2 | 14.8 | 0.152 |
| Lucia Nelida Baca De Beltran            | 14 | 541  | 117.1 | 7.7  | 0.063 |
| Julia Sahuarico Ovalle                  | 14 | 926  | 113.2 | 5.7  | 0.105 |
| Lita Reategui Huesembe                  | 14 | 1135 | 115.5 | 6.7  | 0.131 |
| Fernando Gonzales Garcia                | 14 | 328  | 117.0 | 7.4  | 0.038 |
| Mariacarmen Abarca Choque               | 14 | 1045 | 119.0 | 8.8  | 0.124 |
| Nora Esperanza Belluma Huanuire         | 14 | 1104 | 119.4 | 6.3  | 0.132 |
| Hermelinda Caller Rodriguez             | 14 | 1338 | 116.0 | 9.9  | 0.155 |
| Rolando Espinoza Barrientos             | 14 | 1229 | 116.0 | 10.2 | 0.143 |
| Agustin Paco Mendoza                    | 14 | 768  | 114.6 | 10.4 | 0.088 |
| Irenea Cose Apaza                       | 14 | 1176 | 103.8 | 9.5  | 0.122 |
| Jose Vizcarra Sanchez                   | 14 | 743  | 120.0 | 9.7  | 0.089 |
| Nora Albina Grifa Horiuchi              | 14 | 1094 | 121.9 | 8.8  | 0.133 |
| Elvira Jaqueline Vizcarra Yatto         | 14 | 883  | 120.4 | 6.8  | 0.106 |
| Lidaura Flores Mondragon                | 14 | 994  | 119.7 | 8.3  | 0.119 |
| Irma Tito Cortez                        | 14 | 733  | 119.0 | 6.1  | 0.087 |
| Aprovechamiento y Proyectos en Recursos | 14 | 3030 | 114.7 | 10.9 | 0.348 |
| Alicia Huamani Perez                    | 14 | 442  | 111.6 | 8.0  | 0.049 |
| Luciano Arias Choque                    | 14 | 473  | 95.4  | 11.9 | 0.045 |
| Enrique Navio Arias                     | 14 | 813  | 109.8 | 18.6 | 0.089 |
| Emer Edinson Arimuya Perez              | 14 | 308  | 116.5 | 7.7  | 0.036 |
| Saul Abuid Vargas                       | 14 | 918  | 108.5 | 18.6 | 0.100 |
| Segundo Rodolfo Aguirre Pizango         | 14 | 466  | 123.9 | 4.6  | 0.058 |
| Juan Flores Machaca                     | 14 | 1107 | 101.3 | 31.2 | 0.112 |
| Agapito Pacco Barrientos                | 14 | 408  | 116.7 | 10.3 | 0.048 |
| Hober Luis Del Aguila Izquierdo         | 14 | 1267 | 115.7 | 11.3 | 0.147 |
| Blanca Rosa Ruiz Cardenas               | 14 | 495  | 95.9  | 13.5 | 0.047 |
| Silveria Cruz Montalvo                  | 14 | 1508 | 114.5 | 11.6 | 0.173 |
| Cancio Quispe Nina                      | 14 | 300  | 117.8 | 7.8  | 0.035 |
| Normando Huinga Chapiama                | 14 | 782  | 115.2 | 6.7  | 0.090 |
| Rafael Torres Cacuna                    | 14 | 1501 | 110.4 | 20.4 | 0.166 |
| Salustio Ccopa Aucquilla                | 14 | 1517 | 119.6 | 7.9  | 0.181 |
| Florentina Huaman Quispe                | 14 | 1335 | 116.4 | 10.4 | 0.155 |
| Marco Antonio Gonzales Irarica          | 14 | 611  | 108.5 | 10.4 | 0.066 |

|                                         |    |      |       |      |       |
|-----------------------------------------|----|------|-------|------|-------|
| Juan Condori Jihullanca                 | 14 | 1175 | 107.6 | 13.6 | 0.126 |
| Julio Cacuna Racua                      | 14 | 1269 | 108.6 | 22.0 | 0.138 |
| Aidina Dea Huesembe                     | 14 | 453  | 101.1 | 11.8 | 0.046 |
| Bladimira Cevallos Cachique             | 14 | 1587 | 110.6 | 16.9 | 0.176 |
| Emerson Manuel Vera Guevara             | 14 | 1440 | 120.1 | 8.9  | 0.173 |
| Adrian Canelos Quiroz                   | 14 | 1961 | 118.4 | 9.5  | 0.232 |
| Cecilio Econema Jipa                    | 14 | 1008 | 108.9 | 16.0 | 0.110 |
| Paulina Aguirre Olarte                  | 14 | 655  | 112.3 | 8.0  | 0.074 |
| Paula A. Guerra Flores                  | 14 | 454  | 110.0 | 17.1 | 0.050 |
| Jorge Grifa Noa                         | 14 | 1176 | 106.6 | 17.2 | 0.125 |
| Paulino Roca Guerra                     | 14 | 359  | 109.6 | 21.0 | 0.039 |
| Rufino Condori Cahuata                  | 14 | 886  | 119.9 | 11.2 | 0.106 |
| Benjamin Romulo Moreno Guerra           | 14 | 415  | 115.5 | 10.4 | 0.048 |
| Ciro Juan Morales Bellido               | 14 | 3301 | 113.0 | 7.9  | 0.373 |
| Edmundo Contreras Pumacayo              | 14 | 3787 | 112.2 | 11.3 | 0.425 |
| Pilar Mandujano Baca                    | 14 | 1891 | 115.0 | 8.6  | 0.217 |
| Consuelo Vela Areque                    | 14 | 1334 | 114.9 | 11.0 | 0.153 |
| Juan Ernesto Rivera Lazo                | 14 | 3971 | 118.4 | 11.0 | 0.470 |
| Orfelinda Ochoa Pizango                 | 14 | 852  | 119.6 | 7.4  | 0.102 |
| Dolores Chavez Yumacal                  | 14 | 645  | 110.9 | 9.2  | 0.072 |
| Virgilio Sapa Pineda                    | 14 | 1128 | 114.4 | 9.5  | 0.129 |
| Milciades Gerardo Daniel Alcazar Villeg | 14 | 1814 | 111.9 | 7.3  | 0.203 |
| Carlos Esven Hidalgo Canales            | 14 | 436  | 122.4 | 5.5  | 0.053 |
| Jesus Econema Cacuna                    | 14 | 401  | 103.9 | 23.2 | 0.042 |
| Eduardo Cumari Papa                     | 14 | 497  | 102.8 | 24.8 | 0.051 |
| Raymundo Canelos Yumbo                  | 14 | 674  | 116.5 | 7.8  | 0.079 |
| Abril Natividad Hanco Olivera           | 14 | 747  | 106.7 | 27.5 | 0.080 |
| Nora Beltran Baca                       | 14 | 1319 | 112.8 | 12.2 | 0.149 |
| Hipolito Quiñones Quispe                | 14 | 1089 | 118.5 | 6.6  | 0.129 |
| Luis Andia Sahuarico                    | 14 | 371  | 68.8  | 32.1 | 0.026 |
| Anselmo Vargas Mamani                   | 14 | 723  | 122.7 | 4.2  | 0.089 |
| Benigno Irco Mamani                     | 14 | 874  | 107.7 | 12.1 | 0.094 |
| Laura Baca Econema                      | 14 | 852  | 117.4 | 14.0 | 0.100 |
| Teodoro Becerra Gallegos                | 14 | 1841 | 116.4 | 12.9 | 0.214 |
| Yolanda Apaza Yapura                    | 14 | 287  | 91.4  | 9.0  | 0.026 |
| Casimira Huaman De Mishisaka            | 14 | 730  | 112.4 | 15.6 | 0.082 |
| Nicomedes Ayte Vargas                   | 14 | 836  | 111.7 | 15.8 | 0.093 |
| Nicolai Minaya Cardenas                 | 14 | 1007 | 110.1 | 9.3  | 0.111 |
| Valentin Villena Hinojosa               | 14 | 1897 | 114.7 | 7.1  | 0.218 |
| Susana Margot Pastor Fernandez          | 14 | 1521 | 110.6 | 8.1  | 0.168 |
| Justino Colque Lazaro                   | 14 | 137  | 102.3 | 32.2 | 0.014 |
| Heber Callata Supo                      | 14 | 73   | 93.9  | 36.8 | 0.007 |
| Gustavo Alejandro Rios Hermoza          | 14 | 826  | 125.1 | 4.2  | 0.103 |

|                                 |    |      |       |      |       |
|---------------------------------|----|------|-------|------|-------|
| Wilber Balladares Ramirez       | 14 | 1023 | 116.1 | 6.4  | 0.119 |
| Eleuterio Jurado Frisancho      | 14 | 726  | 105.7 | 9.8  | 0.077 |
| Hilaria Pacco Molina            | 14 | 596  | 116.5 | 9.5  | 0.069 |
| Agapito Delgado Cruz            | 14 | 919  | 121.1 | 8.8  | 0.111 |
| Julian Barragan Haytara         | 14 | 854  | 106.7 | 23.7 | 0.091 |
| Wilbert Mesco Zevallos          | 14 | 781  | 112.1 | 13.6 | 0.088 |
| Wilfredo Mendiguri Mendoza      | 14 | 542  | 112.9 | 19.8 | 0.061 |
| Gregorio Chacon Fernandez       | 14 | 2971 | 118.4 | 10.3 | 0.352 |
| Miguel Torres Cuevas            | 14 | 675  | 108.1 | 19.3 | 0.073 |
| Anelia Valencia Condori         | 14 | 648  | 99.0  | 17.1 | 0.064 |
| Esteban Peña Camaza             | 14 | 991  | 105.9 | 18.3 | 0.105 |
| German Guerra Irarica           | 14 | 247  | 100.5 | 18.3 | 0.025 |
| Alejandro Vela Hidalgo          | 14 | 1194 | 115.4 | 9.7  | 0.138 |
| Jose Raul Lobaton Sequeiros     | 14 | 104  | 75.7  | 44.2 | 0.008 |
| Julio Hurtado Garay             | 14 | 219  | 91.7  | 31.3 | 0.020 |
| Jorge Humberto Tafur Valderrama | 14 | 409  | 97.5  | 24.4 | 0.040 |
| Segundo Moreno Huanuyre         | 14 | 593  | 111.7 | 22.4 | 0.066 |
| Ulises Moreno Huanuire          | 14 | 950  | 118.3 | 18.6 | 0.112 |
| Felipe Quispe Fernandez         | 14 | 511  | 101.5 | 29.8 | 0.052 |
| Avelino Bolivar Zamalloa        | 14 | 1608 | 107.7 | 16.7 | 0.173 |
| Gabriel Ponce Aucaylla          | 14 | 684  | 115.7 | 11.4 | 0.079 |
| Edelmira Flores De Vela         | 14 | 98   | 98.2  | 27.8 | 0.010 |
| Pedro Liberato Amau Gallegos    | 14 | 585  | 100.7 | 19.4 | 0.059 |
| Luis Rojas Quispe               | 14 | 731  | 95.6  | 36.5 | 0.070 |
| Percy Humberto Espirilla Condo  | 14 | 476  | 110.9 | 23.2 | 0.053 |
| Flora Dorila Torres Ahuanari    | 14 | 1473 | 106.8 | 10.3 | 0.157 |
| Rosa Ofelia Fernandez Guerra    | 14 | 1016 | 119.9 | 8.2  | 0.122 |
| Sara Hurtado Orosco             | 14 | 1220 | 113.5 | 12.6 | 0.138 |
| Guillermo Rios Pickman          | 14 | 1584 | 119.0 | 9.5  | 0.188 |
| Julian Mamani Chino             | 14 | 943  | 114.1 | 20.0 | 0.108 |
| Juan Huanuire Econema           | 14 | 663  | 115.7 | 11.9 | 0.077 |
| Cornelio Bolívar Vizarreta      | 14 | 155  | 100.1 | 30.1 | 0.016 |
| Alfonso Vicente Quispe Quiñones | 14 | 158  | 114.4 | 9.9  | 0.018 |
| Juan Emilio Barriga Vissa       | 14 | 1415 | 120.5 | 6.7  | 0.170 |
| Manuel Quispe Gutiérrez         | 14 | 241  | 106.5 | 22.7 | 0.026 |
| Felix Armando Arimuya Inuma     | 14 | 953  | 110.2 | 17.9 | 0.105 |
| Alfonso Valera Perez            | 14 | 280  | 104.7 | 8.3  | 0.029 |
| Milba Bartra Perez              | 14 | 945  | 115.1 | 10.8 | 0.109 |
| Rosa Graciela Sanchez Arquino   | 14 | 1481 | 117.0 | 7.4  | 0.173 |
| Soledad Ruiz Torres             | 14 | 543  | 118.2 | 7.7  | 0.064 |
| Marcos Barriga Villamar         | 14 | 699  | 100.2 | 16.6 | 0.070 |
| Irma Cruz Gutierrez             | 14 | 789  | 105.0 | 10.2 | 0.083 |
| Bonifacio Rocca Ttito           | 14 | 205  | 101.6 | 17.8 | 0.021 |



|                                    |    |      |       |      |       |
|------------------------------------|----|------|-------|------|-------|
| Francisco Vargas Puma              | 14 | 1074 | 115.9 | 16.0 | 0.124 |
| Ysela Aida Bolivar Barriga         | 14 | 438  | 121.5 | 9.2  | 0.053 |
| Pablo Alegre Usca                  | 14 | 556  | 112.9 | 11.5 | 0.063 |
| Igidio Mamani Ccorimanya           | 14 | 189  | 118.3 | 3.7  | 0.022 |
| Jose Quispe Condori                | 14 | 1228 | 115.2 | 8.4  | 0.141 |
| Julian Flores Condori              | 14 | 637  | 95.9  | 17.0 | 0.061 |
| Felix Antonio Huaman Gutierrez     | 14 | 1389 | 123.2 | 5.8  | 0.171 |
| Juan Roberto Delgado Mendoza       | 14 | 324  | 112.4 | 10.9 | 0.036 |
| Fabio Huaman Chavez                | 14 | 1621 | 121.4 | 5.4  | 0.197 |
| Santos Fernandez Alva Zavallos     | 14 | 397  | 115.2 | 9.0  | 0.046 |
| Faustino Chalco Paucar             | 14 | 403  | 109.9 | 11.6 | 0.044 |
| Antonio Mamani Conto               | 14 | 1163 | 103.6 | 8.9  | 0.120 |
| Oscar Angel Alvarez Belson         | 14 | 2358 | 122.9 | 5.6  | 0.290 |
| Teresa Acevedo Alvarado            | 14 | 1245 | 103.4 | 9.6  | 0.129 |
| Rosa Albina Canelos Grifa          | 14 | 818  | 120.0 | 5.9  | 0.098 |
| Hugo Mamani Chavez                 | 14 | 205  | 105.9 | 14.5 | 0.022 |
| Franklin Quispe Gomez              | 14 | 130  | 123.8 | 3.4  | 0.016 |
| Melina Hidalgo Pisco               | 14 | 1575 | 118.4 | 8.8  | 0.187 |
| Bernardo Flores Pereira            | 14 | 928  | 112.8 | 9.0  | 0.105 |
| Aide H. Mejia Ramirez              | 14 | 179  | 102.8 | 29.3 | 0.018 |
| Exilda Shuña Canales               | 14 | 113  | 92.3  | 40.3 | 0.010 |
| Raul Vargas Racua                  | 14 | 433  | 104.7 | 26.0 | 0.045 |
| Ruth Marjorie Flores Saenz         | 14 | 960  | 113.9 | 8.6  | 0.109 |
| Hugo Cesar Huaman Ccopa            | 14 | 776  | 115.7 | 11.3 | 0.090 |
| Gino Castro Molina                 | 14 | 940  | 109.5 | 9.6  | 0.103 |
| Rolando Alberto Molina Bocangel    | 14 | 934  | 105.3 | 10.6 | 0.098 |
| Carmelo Moreno Cachique            | 14 | 664  | 121.7 | 8.3  | 0.081 |
| Nemesio Zavala Perez               | 14 | 340  | 110.6 | 19.5 | 0.038 |
| Nelida Canelos Quiroz              | 14 | 1609 | 123.2 | 5.7  | 0.198 |
| Eulogio Puma Checcori              | 14 | 624  | 110.5 | 20.1 | 0.069 |
| Victor Econema Pacaya              | 14 | 1666 | 117.4 | 8.6  | 0.196 |
| Diana Bouroncle Troncoso           | 14 | 743  | 122.4 | 6.1  | 0.091 |
| Luz Marina Irarica Sanchez         | 14 | 1479 | 115.1 | 8.2  | 0.170 |
| Jesus Francisco Murayari Fasabi    | 14 | 795  | 120.5 | 6.6  | 0.096 |
| Eulogio Amao Romero Rodriguez      | 14 | 1167 | 93.3  | 13.7 | 0.109 |
| Cayetano Pizarro Amao              | 14 | 1540 | 102.8 | 8.3  | 0.158 |
| Francisco Solano Auquilla Condori  | 14 | 950  | 119.9 | 7.4  | 0.114 |
| Eulogia Suni Uturnco               | 14 | 913  | 116.2 | 8.5  | 0.106 |
| Antonio Cose Apaza                 | 14 | 455  | 108.1 | 9.8  | 0.049 |
| Eduardo Alejandro Gutierrez Carpio | 14 | 1458 | 110.9 | 6.7  | 0.162 |
| Aydee Flores De Canales            | 14 | 446  | 94.9  | 26.5 | 0.042 |
| Aladino Racua Cacuna               | 14 | 539  | 110.6 | 16.3 | 0.060 |
| Javier Romeo Chullo Espinoza       | 14 | 1069 | 93.3  | 19.4 | 0.100 |

|                                      |    |      |       |      |       |
|--------------------------------------|----|------|-------|------|-------|
| Esteban Chullo Llanos                | 14 | 921  | 105.6 | 14.4 | 0.097 |
| Pilar Soto Condori                   | 14 | 134  | 115.3 | 12.7 | 0.015 |
| Maria Cristina Loayza Valeriano      | 14 | 781  | 102.0 | 11.8 | 0.080 |
| Felix Condori Taina                  | 14 | 707  | 106.2 | 27.8 | 0.075 |
| Harold Terrazas Flores               | 14 | 848  | 118.1 | 6.9  | 0.100 |
| Libio Guzman Tapia                   | 14 | 459  | 112.5 | 12.1 | 0.052 |
| Marly Villavicencio Mamani           | 14 | 2622 | 109.6 | 7.3  | 0.287 |
| Dyahana Zegarra Ruiz                 | 14 | 1007 | 106.4 | 13.7 | 0.107 |
| Fany Violeta Mostacero Mayo          | 14 | 1014 | 112.6 | 11.2 | 0.114 |
| Julio Lopez Callo                    | 14 | 380  | 119.4 | 5.5  | 0.045 |
| Jesus Carlos Aranzabal Carpio        | 14 | 967  | 109.0 | 12.4 | 0.105 |
| Walter Anselmo Chavez Sanchez        | 14 | 1147 | 114.0 | 11.0 | 0.131 |
| Jose Manuel Corahua Quispe           | 14 | 603  | 114.2 | 11.0 | 0.069 |
| Rocio Miluska Durand Chavez          | 14 | 718  | 116.7 | 9.0  | 0.084 |
| Wilmer Palomino Cordova              | 14 | 262  | 106.6 | 10.6 | 0.028 |
| Luis Alberto Farfan Pezo             | 14 | 901  | 118.7 | 7.5  | 0.107 |
| Janet Encarnacion Capa Panduro       | 14 | 1021 | 113.6 | 10.8 | 0.116 |
| Madison Pilor Aquise Paco            | 14 | 581  | 110.3 | 10.9 | 0.064 |
| Erasmus Condori Flores               | 14 | 1189 | 106.4 | 11.5 | 0.127 |
| Victor Rene Diaz Paredes             | 14 | 1344 | 104.3 | 15.8 | 0.140 |
| Francisco Callo Parhuayo             | 14 | 415  | 101.2 | 33.7 | 0.042 |
| Carlos Revilla Gonzales              | 14 | 1083 | 116.5 | 13.1 | 0.126 |
| Sofia Rosa Paredes Dueñas            | 14 | 1393 | 100.6 | 14.1 | 0.140 |
| Felipe Mauricio Limachi Paucar       | 14 | 571  | 94.2  | 12.2 | 0.054 |
| David Asturima Huamantica            | 14 | 671  | 106.8 | 8.2  | 0.072 |
| Samuel Huamani Vilca                 | 14 | 1828 | 112.8 | 5.8  | 0.206 |
| Guillermo Federico Del Aguila Zuñiga | 14 | 980  | 112.8 | 7.2  | 0.111 |
| Celia Fpuro Taiña                    | 14 | 229  | 97.6  | 18.1 | 0.022 |
| Dagui Marilu Ynuma Beyuma            | 14 | 719  | 115.1 | 7.2  | 0.083 |
| Dennys Pizarro Alarcon               | 14 | 813  | 105.1 | 8.2  | 0.085 |
| Elmer Perez Piño                     | 14 | 124  | 113.6 | 15.6 | 0.014 |
| Jacqueline Solis Vera                | 14 | 660  | 107.0 | 8.3  | 0.071 |
| Karen Elizabeth Frisancho Taborga    | 14 | 1462 | 111.9 | 10.7 | 0.164 |
| Luis A Collazos Sanchez              | 14 | 943  | 118.4 | 8.3  | 0.112 |
| Martin Ricardo Miranda Rivera        | 14 | 147  | 72.0  | 36.0 | 0.011 |
| Matilde Pacherras De Guerra          | 14 | 292  | 110.9 | 5.6  | 0.032 |
| Miguel Ulises Odagawa Sanchez        | 14 | 292  | 117.1 | 7.1  | 0.034 |
| Rita Moreno Jipa                     | 14 | 1637 | 111.9 | 10.7 | 0.183 |
| Guillermina Carpio Ramos             | 14 | 1034 | 112.9 | 15.1 | 0.117 |
| Fredy Quispe Aguilar                 | 14 | 1490 | 105.9 | 11.5 | 0.158 |
| Faustina Quispe Carrasco             | 14 | 864  | 96.1  | 17.1 | 0.083 |
| Daniel Suclli Laura                  | 14 | 901  | 114.6 | 13.1 | 0.103 |
| Paola Dulanto Chapiama               | 14 | 1546 | 122.1 | 5.8  | 0.189 |

|                                     |    |      |       |      |       |
|-------------------------------------|----|------|-------|------|-------|
| Luz Angelica Roca Guerra            | 14 | 431  | 105.1 | 30.2 | 0.045 |
| Rofina Quispe Barreto               | 14 | 912  | 101.7 | 8.4  | 0.093 |
| Dalila Nuñez Fernandez              | 14 | 1051 | 111.2 | 6.8  | 0.117 |
| Rony Asipali Lopez                  | 14 | 524  | 119.7 | 8.6  | 0.063 |
| Juan Huallpa Quispe                 | 14 | 1434 | 115.0 | 10.3 | 0.165 |
| Gumerindo Blanco Vargas             | 14 | 762  | 118.4 | 6.8  | 0.090 |
| Jackelina Morales Troncoso          | 14 | 1859 | 116.0 | 6.0  | 0.216 |
| Edgar Tipula Mullisaca              | 14 | 1547 | 113.6 | 9.1  | 0.176 |
| Francisco Rodrigue Seiko            | 14 | 768  | 118.1 | 9.4  | 0.091 |
| Justo Ticona Colquehuanca           | 14 | 4415 | 107.5 | 10.0 | 0.475 |
| Herver Flores Saavedra              | 14 | 640  | 113.7 | 10.6 | 0.073 |
| Liliana Solis Chalco                | 14 | 1206 | 113.4 | 9.9  | 0.137 |
| Andres Ernesto Cachique Chapiamama  | 14 | 609  | 113.8 | 9.8  | 0.069 |
| Ismenia Mariño Gonzales             | 14 | 859  | 101.8 | 10.0 | 0.087 |
| Yvan Quispe Duran                   | 14 | 1127 | 112.4 | 9.6  | 0.127 |
| Apolinario Carlos Vasquez           | 14 | 1066 | 115.4 | 12.7 | 0.123 |
| Maria Jesus Vargas Ramirez          | 14 | 826  | 112.4 | 8.4  | 0.093 |
| Clara Dorotea Moroco Cartagena      | 14 | 742  | 100.6 | 20.6 | 0.075 |
| Janet Sonia Paucar Muriel           | 14 | 1117 | 114.3 | 11.1 | 0.128 |
| Nelson Wiltembug Gutierrez Carpio   | 14 | 672  | 79.9  | 16.7 | 0.054 |
| Alcibiades Canelos Yumbo            | 14 | 842  | 114.2 | 17.2 | 0.096 |
| Faustina Vicente Paucar             | 14 | 809  | 110.4 | 14.4 | 0.089 |
| Santiago Edelyn Sierra Tito         | 14 | 1111 | 111.2 | 8.8  | 0.124 |
| Aida Evita Gosalvez Campos          | 14 | 1034 | 111.6 | 9.4  | 0.115 |
| Froilan Jaime Aliaga Condori        | 14 | 497  | 102.2 | 7.7  | 0.051 |
| Bacilia Mamani Sucasaire            | 14 | 185  | 108.5 | 26.4 | 0.020 |
| Eleuterio Martinez Arimuya          | 14 | 246  | 96.8  | 22.4 | 0.024 |
| Maria Salome Mendivil Medina        | 14 | 635  | 116.6 | 14.8 | 0.074 |
| Silvia Apaza Hidalgo                | 14 | 855  | 116.5 | 8.1  | 0.100 |
| Dionisio Lima Armuto                | 14 | 877  | 114.7 | 11.5 | 0.101 |
| Jose Cotaluque Maihua               | 14 | 1059 | 119.1 | 12.1 | 0.126 |
| Gregorio Huillcca Gallegos          | 14 | 1420 | 121.5 | 13.1 | 0.173 |
| Justino Palomino Mercado            | 14 | 2503 | 120.2 | 6.1  | 0.301 |
| Rudencinda Gutierrez Garcia         | 14 | 147  | 105.4 | 11.9 | 0.015 |
| Richard Antonio Fernandez Narvaez   | 14 | 628  | 110.9 | 9.8  | 0.070 |
| Lidaura Flores Mondagron            | 14 | 1059 | 122.2 | 8.4  | 0.129 |
| Hilda Chavez Jipa                   | 14 | 522  | 113.1 | 12.7 | 0.059 |
| Cirilo Torres Ttito                 | 14 | 377  | 112.2 | 16.5 | 0.042 |
| Florinda Flora Yupanqui Quispe      | 14 | 2184 | 117.0 | 9.1  | 0.256 |
| Oswaldo Saavedra Gongora            | 14 | 719  | 118.4 | 7.3  | 0.085 |
| Marcos Maximiliano Gonzales Gamarra | 14 | 924  | 119.4 | 8.2  | 0.110 |
| Zoila Norma Racua Guerra            | 14 | 1748 | 104.4 | 21.9 | 0.182 |
| Humberto Ovalle Arana               | 14 | 733  | 109.3 | 6.4  | 0.080 |

|                                      |    |      |       |      |         |
|--------------------------------------|----|------|-------|------|---------|
| Hidelita Josefa Quispe Jacobo        | 14 | 932  | 57.6  | 17.9 | 0.054   |
| Yuri Lima Laura                      | 14 | 706  | 100.8 | 7.4  | 0.071   |
| Agueda Pacherras Salazar             | 14 | 140  | 114.2 | 19.9 | 0.016   |
| Florencio Guerra Irarica             | 14 | 724  | 103.8 | 22.5 | 0.075   |
| Luis Nina Pacheco                    | 14 | 605  | 117.7 | 8.4  | 0.071   |
| Daniel Grifa Noa                     | 14 | 579  | 119.0 | 6.7  | 0.069   |
| Salomon Correa Terrones              | 14 | 635  | 103.7 | 18.8 | 0.066   |
| Estanislao Lopez Vera                | 14 | 737  | 117.4 | 8.0  | 0.086   |
| Asunta Machaca Amanqui               | 14 | 522  | 100.6 | 24.0 | 0.053   |
| Edgar Huaman Palomino                | 14 | 452  | 115.7 | 8.1  | 0.052   |
| Zoila Nelida Yarichua Arimuya        | 14 | 1122 | 91.9  | 20.8 | 0.103   |
| Vicente Guido Achapuri Alanquia      | 14 | 791  | 107.9 | 7.4  | 0.085   |
| Patricia Quispe Vega                 | 14 | 657  | 68.9  | 28.7 | 0.045   |
| Juvenal Torres Cereceda              | 14 | 1    | 120.7 | 0.0  | < 0.001 |
| Miriam Laura Quispe                  | 14 | 814  | 103.1 | 8.0  | 0.084   |
| Nicanor Cjuno Peña                   | 14 | 101  | 104.8 | 27.7 | 0.011   |
| Anastacio Challco Visa               | 14 | 1319 | 101.1 | 12.7 | 0.133   |
| Beatriz Valencia Ayma                | 14 | 1569 | 99.8  | 11.3 | 0.157   |
| Elvis Ivan Barriga Guevara           | 14 | 661  | 104.5 | 11.4 | 0.069   |
| Cirilo Zenon Cari Collanqui          | 14 | 828  | 107.9 | 18.9 | 0.089   |
| Jesusa Cussi Mirano                  | 14 | 815  | 108.7 | 10.5 | 0.089   |
| Bernardino Villafuerte Mamani        | 14 | 2634 | 108.0 | 16.0 | 0.284   |
| Daniel Sanchez Rengifo               | 14 | 584  | 94.9  | 19.0 | 0.055   |
| Eulogio Quispe Chani                 | 14 | 575  | 114.6 | 21.9 | 0.066   |
| Donato Machaca Cruz                  | 14 | 2128 | 107.9 | 16.9 | 0.230   |
| Piero Mirko Trigosso Torres          | 14 | 840  | 108.2 | 21.1 | 0.091   |
| Leni Cacuna Rodriguez                | 14 | 261  | 116.7 | 11.6 | 0.030   |
| Lidia Rosa Torres Canelos            | 14 | 1260 | 122.2 | 7.6  | 0.154   |
| Teobaldo Aristides Reategui Trigosso | 14 | 444  | 118.2 | 12.5 | 0.052   |
| Eritxon Aldo Aguirre Peralta         | 14 | 867  | 110.6 | 11.8 | 0.096   |
| Maribel Yeni Aparicio Carpio         | 14 | 828  | 111.0 | 10.7 | 0.092   |
| Benedicto Baca Rosado                | 14 | 770  | 71.2  | 32.7 | 0.055   |

**\*Protected area type:**

1. National Park
2. National Reserve
3. Communal Reserve
4. Protected Forest
5. National Sanctuary
6. Historical Sanctuary
7. Reserve Zone
8. Other
9. Rubber Concession
10. Conservation Concession
11. Ecotourism Concession
12. Wildlife Management Concession
13. Reforestation Concession
14. Brazil Nut Concession
